# Supplementary material for: Mapping the Literature on Diet and Multiple Sclerosis: A Data-Driven Approach
Source: Nutrients. 2022 Nov 14;14(22):4820. doi: 10.3390/nu14224820 (PMC9696310; doi:10.3390/nu14224820)
Supplement: Supplementary file 1 [file nutrients-14-04820-s001.zip › Supplementary File S1-All retrieved articles by clusters.xlsx]

## Sheet: Sheet1
Supplementary Spreadsheet 1. All retrieved articles by clusters
authors	title	source	year	doi	cit_score	cluster_level_1	cluster_level_2	cluster_level_3	cluster_level_4	omnibus_cluster_designation
zhang, wh; becker, h; stuifbergen, ak; brown, a	`predicting health promotion and quality of life with symptom clusters and social supports among older adults with multiple sclerosis	journal of gerontological nursing	2017	10.3928/00989134-20170406-04	0	NA	NA	NA	NA	NA_NA_NA_NA
tian, h; cheng, yh; zhang, yy; bai, xy; jiang, y; li, jj; fan, sq; ding, h	18 beta-glycyrrhetinic acid alleviates demyelination by modulating the microglial m1/m2 phenotype in a mouse model of cuprizone-induced demyelination	neuroscience letters	2021	10.1016/j.neulet.2021.135871	0	2	a	NA	NA	2_a_NA_NA
tian, h; cheng, yh; zhang, yy; bai, xy; jiang, y; li, jj; fan, sq; ding, h	18 beta-glycyrrhetinic acid alleviates demyelination by modulating the microglial m1/m2 phenotype in a mouse model of cuprizone-induced demyelination	neuroscience letters	2021	10.1016/j.neulet.2021.135871	0	2	NA	NA	NA	2_NA_NA_NA
geisler, jg	2,4 dinitrophenol as medicine	cells	2019	10.3390/cells8030280	0	1	b	b	NA	1_b_b_NA
geisler, jg	2,4 dinitrophenol as medicine	cells	2019	10.3390/cells8030280	0	1	b	NA	NA	1_b_NA_NA
geisler, jg	2,4 dinitrophenol as medicine	cells	2019	10.3390/cells8030280	0	1	NA	NA	NA	1_NA_NA_NA
leoni, v; caccia, c	24s-hydroxycholesterol in plasma: a marker of cholesterol turnover in neurodegenerative diseases	biochimie	2013	10.1016/j.biochi.2012.09.025	1	2	NA	NA	NA	2_NA_NA_NA
dekremer, rd; kelley, ri; deboldini, cd; decapra, ap; corbella, l; givogri, i; deayala, ag; albarenque, m	3-hydroxy-3-methylglutaryl coenzyme-a lyase deficiency as a cause of severe neurological damage	medicina-buenos aires	1992	NA	0	NA	NA	NA	NA	NA_NA_NA_NA
[anonymous]	48th annual congress of the canadian neurological sciences federation, montreal, quebec, canada, june 12-14, 2013 abstracts	canadian journal of neurological sciences	2013	10.1017/s031716710001708x	0	NA	NA	NA	NA	NA_NA_NA_NA
moriguchi, k; miyamoto, k; kusunoki, s	4-aminopyridine ameliorates experimental autoimmune neuritis in lewis rats	journal of neuroimmunology	2017	10.1016/j.jneuroim.2017.01.023	0	NA	NA	NA	NA	NA_NA_NA_NA
lillemae, k; ress, k; harro, j; merenakk, l; maaroos, hi; uibo, r; uibo, o	a 10-year serological follow-up of celiac disease in an estonian population	european journal of gastroenterology & hepatology	2012	10.1097/meg.0b013e32834d09b9	0	NA	NA	NA	NA	NA_NA_NA_NA
aubourg, p; adamsbaum, c; lavallardrousseau, mc; rocchiccioli, f; cartier, n; jambaque, i; jakobezak, c; lemaitre, a; boureau, f; wolf, c; bougneres, pf	a 2-year trial of oleic and erucic acids (lorenzo oil) as treatment for adrenomyeloneuropathy	new england journal of medicine	1993	10.1056/nejm199309093291101	5	NA	NA	NA	NA	NA_NA_NA_NA
rossi, g; vallesi, g; raggi, f; giustozzi, m	a case report of dietary integration therapy based on hairmineral analysis slows the progression of multiple sclerosis. implication for cancer prevention	world cancer research journal	2014	NA	0	NA	NA	NA	NA	NA_NA_NA_NA
mcdonald, j; graves, j; waldman, a; lotze, t; schreiner, t; belman, a; greenberg, b; weinstock-guttman, b; aaen, g; tillema, jm; hart, j; lulu, s; ness, j; harris, y; rubin, j; candee, m; krupp, lb; gorman, m; benson, l; rodriguez, m; chitnis, t; mar, s; barcellos, lf; laraia, b; rose, j; roalstad, s; simmons, t; casper, tc; waubant, e	a case-control study of dietary salt intake in pediatric-onset multiple sclerosis	multiple sclerosis and related disorders	2016	10.1016/j.msard.2016.02.011	17	1	b	a	NA	1_b_a_NA
mcdonald, j; graves, j; waldman, a; lotze, t; schreiner, t; belman, a; greenberg, b; weinstock-guttman, b; aaen, g; tillema, jm; hart, j; lulu, s; ness, j; harris, y; rubin, j; candee, m; krupp, lb; gorman, m; benson, l; rodriguez, m; chitnis, t; mar, s; barcellos, lf; laraia, b; rose, j; roalstad, s; simmons, t; casper, tc; waubant, e	a case-control study of dietary salt intake in pediatric-onset multiple sclerosis	multiple sclerosis and related disorders	2016	10.1016/j.msard.2016.02.011	17	1	b	NA	NA	1_b_NA_NA
mcdonald, j; graves, j; waldman, a; lotze, t; schreiner, t; belman, a; greenberg, b; weinstock-guttman, b; aaen, g; tillema, jm; hart, j; lulu, s; ness, j; harris, y; rubin, j; candee, m; krupp, lb; gorman, m; benson, l; rodriguez, m; chitnis, t; mar, s; barcellos, lf; laraia, b; rose, j; roalstad, s; simmons, t; casper, tc; waubant, e	a case-control study of dietary salt intake in pediatric-onset multiple sclerosis	multiple sclerosis and related disorders	2016	10.1016/j.msard.2016.02.011	17	1	NA	NA	NA	1_NA_NA_NA
rosser, ec; mauri, c	a clinical update on the significance of the gut microbiota in systemic autoimmunity	journal of autoimmunity	2016	10.1016/j.jaut.2016.06.009	5	1	b	c	NA	1_b_c_NA
rosser, ec; mauri, c	a clinical update on the significance of the gut microbiota in systemic autoimmunity	journal of autoimmunity	2016	10.1016/j.jaut.2016.06.009	5	1	b	NA	NA	1_b_NA_NA
rosser, ec; mauri, c	a clinical update on the significance of the gut microbiota in systemic autoimmunity	journal of autoimmunity	2016	10.1016/j.jaut.2016.06.009	5	1	NA	NA	NA	1_NA_NA_NA
pierpaoli, w	a common etiology and a common therapy	reversal of aging: resetting the pineal clock	2005	10.1196/annals.1356.024	0	NA	NA	NA	NA	NA_NA_NA_NA
burrai, f; hasan, w; luppi, m; micheluzzi, v	a conceptual framework encompassing the psychoneuroimmunoendocrinological influences of listening to music in patients with heart failure	holistic nursing practice	2018	10.1097/hnp.0000000000000253	0	NA	NA	NA	NA	NA_NA_NA_NA
akbay, gd; karakullukcu, e; mutlu, aa	a controlled descriptive study to determine the nutritional status and biochemical parameters of multiple sclerosis patients	neurology india	2020	10.4103/0028-3886.293462	0	1	a	b	NA	1_a_b_NA
akbay, gd; karakullukcu, e; mutlu, aa	a controlled descriptive study to determine the nutritional status and biochemical parameters of multiple sclerosis patients	neurology india	2020	10.4103/0028-3886.293462	0	1	a	NA	NA	1_a_NA_NA
akbay, gd; karakullukcu, e; mutlu, aa	a controlled descriptive study to determine the nutritional status and biochemical parameters of multiple sclerosis patients	neurology india	2020	10.4103/0028-3886.293462	0	1	NA	NA	NA	1_NA_NA_NA
coe, s; tektonidis, tg; coverdale, c; penny, s; collett, j; chu, bty; izadi, h; middleton, r; dawes, h	a cross sectional assessment of nutrient intake and the association of the inflammatory properties of nutrients and foods with symptom severity in a large cohort from the uk multiple sclerosis registry	nutrition research	2021	10.1016/j.nutres.2020.11.006	0	1	a	a	a	1_a_a_a
coe, s; tektonidis, tg; coverdale, c; penny, s; collett, j; chu, bty; izadi, h; middleton, r; dawes, h	a cross sectional assessment of nutrient intake and the association of the inflammatory properties of nutrients and foods with symptom severity in a large cohort from the uk multiple sclerosis registry	nutrition research	2021	10.1016/j.nutres.2020.11.006	0	1	a	a	NA	1_a_a_NA
coe, s; tektonidis, tg; coverdale, c; penny, s; collett, j; chu, bty; izadi, h; middleton, r; dawes, h	a cross sectional assessment of nutrient intake and the association of the inflammatory properties of nutrients and foods with symptom severity in a large cohort from the uk multiple sclerosis registry	nutrition research	2021	10.1016/j.nutres.2020.11.006	0	1	a	NA	NA	1_a_NA_NA
coe, s; tektonidis, tg; coverdale, c; penny, s; collett, j; chu, bty; izadi, h; middleton, r; dawes, h	a cross sectional assessment of nutrient intake and the association of the inflammatory properties of nutrients and foods with symptom severity in a large cohort from the uk multiple sclerosis registry	nutrition research	2021	10.1016/j.nutres.2020.11.006	0	1	NA	NA	NA	1_NA_NA_NA
senadim, s; cabalar, m; gedik, h; kasim, ab; bulut, a; yayla, v; erdogdu, z	a cross-sectional evaluation of home health service in patients with chronic neurologic diseases in a province of turkey	acta neurologica belgica	2016	10.1007/s13760-015-0509-x	0	NA	NA	NA	NA	NA_NA_NA_NA
choi, iy; piccio, l; childress, p; bollman, b; ghosh, a; brandhorst, s; suarez, j; michalsen, a; cross, ah; morgan, te; wei, m; paul, f; bock, m; longo, vd	a diet mimicking fasting promotes regeneration and reduces autoimmunity and multiple sclerosis symptoms	cell reports	2016	10.1016/j.celrep.2016.05.009	42	1	b	b	NA	1_b_b_NA
choi, iy; piccio, l; childress, p; bollman, b; ghosh, a; brandhorst, s; suarez, j; michalsen, a; cross, ah; morgan, te; wei, m; paul, f; bock, m; longo, vd	a diet mimicking fasting promotes regeneration and reduces autoimmunity and multiple sclerosis symptoms	cell reports	2016	10.1016/j.celrep.2016.05.009	42	1	b	NA	NA	1_b_NA_NA
choi, iy; piccio, l; childress, p; bollman, b; ghosh, a; brandhorst, s; suarez, j; michalsen, a; cross, ah; morgan, te; wei, m; paul, f; bock, m; longo, vd	a diet mimicking fasting promotes regeneration and reduces autoimmunity and multiple sclerosis symptoms	cell reports	2016	10.1016/j.celrep.2016.05.009	42	1	NA	NA	NA	1_NA_NA_NA
akbay, gd; karakullukcu, e; mutlu, aa	a gender stratified controlled descriptive study to identify how specific food and drink consumption differentiate in ms	progress in nutrition	2021	10.23751/pn.v23i1.9064	0	1	a	b	NA	1_a_b_NA
akbay, gd; karakullukcu, e; mutlu, aa	a gender stratified controlled descriptive study to identify how specific food and drink consumption differentiate in ms	progress in nutrition	2021	10.23751/pn.v23i1.9064	0	1	a	NA	NA	1_a_NA_NA
akbay, gd; karakullukcu, e; mutlu, aa	a gender stratified controlled descriptive study to identify how specific food and drink consumption differentiate in ms	progress in nutrition	2021	10.23751/pn.v23i1.9064	0	1	NA	NA	NA	1_NA_NA_NA
black, lj; rowley, c; sherriff, j; pereira, g; ponsonby, al; lucas, rm; blackie, j; bourke, r; cameron, j; carne, r; clark, b; collins, s; conrad, d; coroneos, m; downie, n; floate, d; gates, p; green, k; groeneveld, e; harrison, j; haybittel, m; henderson, r; henshaw, j; hurley, j; jones, d; katekar, m; kemp, a; king, m; kiroff, g; knight, b; kraemer, t; lander, c; lechner-scott, j; loiselle, a;…	a healthy dietary pattern associates with a lower risk of a first clinical diagnosis of central nervous system demyelination	multiple sclerosis journal	2019	10.1177/1352458518793524	12	1	a	a	a	1_a_a_a
black, lj; rowley, c; sherriff, j; pereira, g; ponsonby, al; lucas, rm; blackie, j; bourke, r; cameron, j; carne, r; clark, b; collins, s; conrad, d; coroneos, m; downie, n; floate, d; gates, p; green, k; groeneveld, e; harrison, j; haybittel, m; henderson, r; henshaw, j; hurley, j; jones, d; katekar, m; kemp, a; king, m; kiroff, g; knight, b; kraemer, t; lander, c; lechner-scott, j; loiselle, a;…	a healthy dietary pattern associates with a lower risk of a first clinical diagnosis of central nervous system demyelination	multiple sclerosis journal	2019	10.1177/1352458518793524	12	1	a	a	NA	1_a_a_NA
black, lj; rowley, c; sherriff, j; pereira, g; ponsonby, al; lucas, rm; blackie, j; bourke, r; cameron, j; carne, r; clark, b; collins, s; conrad, d; coroneos, m; downie, n; floate, d; gates, p; green, k; groeneveld, e; harrison, j; haybittel, m; henderson, r; henshaw, j; hurley, j; jones, d; katekar, m; kemp, a; king, m; kiroff, g; knight, b; kraemer, t; lander, c; lechner-scott, j; loiselle, a;…	a healthy dietary pattern associates with a lower risk of a first clinical diagnosis of central nervous system demyelination	multiple sclerosis journal	2019	10.1177/1352458518793524	12	1	a	NA	NA	1_a_NA_NA
black, lj; rowley, c; sherriff, j; pereira, g; ponsonby, al; lucas, rm; blackie, j; bourke, r; cameron, j; carne, r; clark, b; collins, s; conrad, d; coroneos, m; downie, n; floate, d; gates, p; green, k; groeneveld, e; harrison, j; haybittel, m; henderson, r; henshaw, j; hurley, j; jones, d; katekar, m; kemp, a; king, m; kiroff, g; knight, b; kraemer, t; lander, c; lechner-scott, j; loiselle, a;…	a healthy dietary pattern associates with a lower risk of a first clinical diagnosis of central nervous system demyelination	multiple sclerosis journal	2019	10.1177/1352458518793524	12	1	NA	NA	NA	1_NA_NA_NA
black, lj; baker, k; ponsonby, al; van der mei, i; lucas, rm; pereira, g	a higher mediterranean diet score, including unprocessed red meat, is associated with reduced risk of central nervous system demyelination in a case-control study of australian adults	journal of nutrition	2019	10.1093/jn/nxz089	11	1	a	a	a	1_a_a_a
black, lj; baker, k; ponsonby, al; van der mei, i; lucas, rm; pereira, g	a higher mediterranean diet score, including unprocessed red meat, is associated with reduced risk of central nervous system demyelination in a case-control study of australian adults	journal of nutrition	2019	10.1093/jn/nxz089	11	1	a	a	NA	1_a_a_NA
black, lj; baker, k; ponsonby, al; van der mei, i; lucas, rm; pereira, g	a higher mediterranean diet score, including unprocessed red meat, is associated with reduced risk of central nervous system demyelination in a case-control study of australian adults	journal of nutrition	2019	10.1093/jn/nxz089	11	1	a	NA	NA	1_a_NA_NA
black, lj; baker, k; ponsonby, al; van der mei, i; lucas, rm; pereira, g	a higher mediterranean diet score, including unprocessed red meat, is associated with reduced risk of central nervous system demyelination in a case-control study of australian adults	journal of nutrition	2019	10.1093/jn/nxz089	11	1	NA	NA	NA	1_NA_NA_NA
bilgic, b; arslan, ab; bulut, h; bayram, a; hizli, fg	a marchiafava-bignami patient with mild symptoms and the role of diffusion-weighted magnetic resonance imaging in the diagnosis	noropsikiyatri arsivi-archives of neuropsychiatry	2011	10.4274/npa.y5861	0	NA	NA	NA	NA	NA_NA_NA_NA
yadav, sk; ir, r; jeewon, r; doble, m; hyde, kd; kaliappan, i; jeyaraman, r; reddi, rn; krishnan, j; li, m; durairajan, ssk	a mechanistic review on medicinal mushrooms-derived bioactive compounds: potential mycotherapy candidates for alleviating neurological disorders	planta medica	2020	10.1055/a-1177-4834	0	NA	NA	NA	NA	NA_NA_NA_NA
mirashrafi, s; borzoo-isfahani, m; namjoo, i; kermani, mah; moravejolahkami, ar	a mediterranean-type diet improved systemic inflammation in multiple sclerosis patients, as compared to the traditional iranian diet: a single-center randomized controlled trial	mediterranean journal of nutrition and metabolism	2021	10.3233/mnm-210557	0	1	a	a	a	1_a_a_a
mirashrafi, s; borzoo-isfahani, m; namjoo, i; kermani, mah; moravejolahkami, ar	a mediterranean-type diet improved systemic inflammation in multiple sclerosis patients, as compared to the traditional iranian diet: a single-center randomized controlled trial	mediterranean journal of nutrition and metabolism	2021	10.3233/mnm-210557	0	1	a	a	NA	1_a_a_NA
mirashrafi, s; borzoo-isfahani, m; namjoo, i; kermani, mah; moravejolahkami, ar	a mediterranean-type diet improved systemic inflammation in multiple sclerosis patients, as compared to the traditional iranian diet: a single-center randomized controlled trial	mediterranean journal of nutrition and metabolism	2021	10.3233/mnm-210557	0	1	a	NA	NA	1_a_NA_NA
mirashrafi, s; borzoo-isfahani, m; namjoo, i; kermani, mah; moravejolahkami, ar	a mediterranean-type diet improved systemic inflammation in multiple sclerosis patients, as compared to the traditional iranian diet: a single-center randomized controlled trial	mediterranean journal of nutrition and metabolism	2021	10.3233/mnm-210557	0	1	NA	NA	NA	1_NA_NA_NA
lee, je; titcomb, tj; bisht, b; rubenstein, lm; louison, r; wahls, tl	a modified mct-based ketogenic diet increases plasma beta-hydroxybutyrate but has less effect on fatigue and quality of life in people with multiple sclerosis compared to a modified paleolithic diet: a waitlist-controlled, randomized pilot study	journal of the american college of nutrition	2021	10.1080/07315724.2020.1734988	3	1	a	a	a	1_a_a_a
lee, je; titcomb, tj; bisht, b; rubenstein, lm; louison, r; wahls, tl	a modified mct-based ketogenic diet increases plasma beta-hydroxybutyrate but has less effect on fatigue and quality of life in people with multiple sclerosis compared to a modified paleolithic diet: a waitlist-controlled, randomized pilot study	journal of the american college of nutrition	2021	10.1080/07315724.2020.1734988	3	1	a	a	NA	1_a_a_NA
lee, je; titcomb, tj; bisht, b; rubenstein, lm; louison, r; wahls, tl	a modified mct-based ketogenic diet increases plasma beta-hydroxybutyrate but has less effect on fatigue and quality of life in people with multiple sclerosis compared to a modified paleolithic diet: a waitlist-controlled, randomized pilot study	journal of the american college of nutrition	2021	10.1080/07315724.2020.1734988	3	1	a	NA	NA	1_a_NA_NA
lee, je; titcomb, tj; bisht, b; rubenstein, lm; louison, r; wahls, tl	a modified mct-based ketogenic diet increases plasma beta-hydroxybutyrate but has less effect on fatigue and quality of life in people with multiple sclerosis compared to a modified paleolithic diet: a waitlist-controlled, randomized pilot study	journal of the american college of nutrition	2021	10.1080/07315724.2020.1734988	3	1	NA	NA	NA	1_NA_NA_NA
bisht, b; darling, wg; grossmann, re; shivapour, et; lutgendorf, sk; snetselaar, lg; hall, mj; zimmerman, mb; wahls, tl	a multimodal intervention for patients with secondary progressive multiple sclerosis: feasibility and effect on fatigue	journal of alternative and complementary medicine	2014	10.1089/acm.2013.0188	26	1	a	a	a	1_a_a_a
bisht, b; darling, wg; grossmann, re; shivapour, et; lutgendorf, sk; snetselaar, lg; hall, mj; zimmerman, mb; wahls, tl	a multimodal intervention for patients with secondary progressive multiple sclerosis: feasibility and effect on fatigue	journal of alternative and complementary medicine	2014	10.1089/acm.2013.0188	26	1	a	a	NA	1_a_a_NA
bisht, b; darling, wg; grossmann, re; shivapour, et; lutgendorf, sk; snetselaar, lg; hall, mj; zimmerman, mb; wahls, tl	a multimodal intervention for patients with secondary progressive multiple sclerosis: feasibility and effect on fatigue	journal of alternative and complementary medicine	2014	10.1089/acm.2013.0188	26	1	a	NA	NA	1_a_NA_NA
bisht, b; darling, wg; grossmann, re; shivapour, et; lutgendorf, sk; snetselaar, lg; hall, mj; zimmerman, mb; wahls, tl	a multimodal intervention for patients with secondary progressive multiple sclerosis: feasibility and effect on fatigue	journal of alternative and complementary medicine	2014	10.1089/acm.2013.0188	26	1	NA	NA	NA	1_NA_NA_NA
lee, je; bisht, b; hall, mj; rubenstein, lm; louison, r; klein, dt; wahls, tl	a multimodal, nonpharmacologic intervention improves mood and cognitive function in people with multiple sclerosis	journal of the american college of nutrition	2017	10.1080/07315724.2016.1255160	15	1	a	a	a	1_a_a_a
lee, je; bisht, b; hall, mj; rubenstein, lm; louison, r; klein, dt; wahls, tl	a multimodal, nonpharmacologic intervention improves mood and cognitive function in people with multiple sclerosis	journal of the american college of nutrition	2017	10.1080/07315724.2016.1255160	15	1	a	a	NA	1_a_a_NA
lee, je; bisht, b; hall, mj; rubenstein, lm; louison, r; klein, dt; wahls, tl	a multimodal, nonpharmacologic intervention improves mood and cognitive function in people with multiple sclerosis	journal of the american college of nutrition	2017	10.1080/07315724.2016.1255160	15	1	a	NA	NA	1_a_NA_NA
lee, je; bisht, b; hall, mj; rubenstein, lm; louison, r; klein, dt; wahls, tl	a multimodal, nonpharmacologic intervention improves mood and cognitive function in people with multiple sclerosis	journal of the american college of nutrition	2017	10.1080/07315724.2016.1255160	15	1	NA	NA	NA	1_NA_NA_NA
moyle, jj; fox, am; bynevelt, m; arthur, m; burnett, jr	a neuropsychological profile of off-diet adults with phenylketonuria	journal of clinical and experimental neuropsychology	2007	10.1080/13803390600745829	0	NA	NA	NA	NA	NA_NA_NA_NA
ahlawat, a; sharma, s	a new promising simultaneous approach for attenuating type ii diabetes mellitus induced neuropathic pain in rats: inos inhibition and neuroregeneration	european journal of pharmacology	2018	10.1016/j.ejphar.2017.11.010	0	NA	NA	NA	NA	NA_NA_NA_NA
pantzaris, mc; loukaides, gn; ntzani, ee; patrikios, is	a novel oral nutraceutical formula of omega-3 and omega-6 fatty acids with vitamins (plp10) in relapsing remitting multiple sclerosis: a randomised, double-blind, placebo-controlled proof-of-concept clinical trial	bmj open	2013	10.1136/bmjopen-2012-002170	16	1	a	a	a	1_a_a_a
pantzaris, mc; loukaides, gn; ntzani, ee; patrikios, is	a novel oral nutraceutical formula of omega-3 and omega-6 fatty acids with vitamins (plp10) in relapsing remitting multiple sclerosis: a randomised, double-blind, placebo-controlled proof-of-concept clinical trial	bmj open	2013	10.1136/bmjopen-2012-002170	16	1	a	a	NA	1_a_a_NA
pantzaris, mc; loukaides, gn; ntzani, ee; patrikios, is	a novel oral nutraceutical formula of omega-3 and omega-6 fatty acids with vitamins (plp10) in relapsing remitting multiple sclerosis: a randomised, double-blind, placebo-controlled proof-of-concept clinical trial	bmj open	2013	10.1136/bmjopen-2012-002170	16	1	a	NA	NA	1_a_NA_NA
pantzaris, mc; loukaides, gn; ntzani, ee; patrikios, is	a novel oral nutraceutical formula of omega-3 and omega-6 fatty acids with vitamins (plp10) in relapsing remitting multiple sclerosis: a randomised, double-blind, placebo-controlled proof-of-concept clinical trial	bmj open	2013	10.1136/bmjopen-2012-002170	16	1	NA	NA	NA	1_NA_NA_NA
unzicker, a; pingault, v; meyer, t; rauthe, s; schutz, a; kunzmann, s	a novel sox10 mutation in a patient with pcwh who developed hypoxic-ischemic encephalopathy after e. coli sepsis	european journal of pediatrics	2011	10.1007/s00431-011-1539-x	0	NA	NA	NA	NA	NA_NA_NA_NA
tucker, tw	a physics link between venous stenosis and multiple sclerosis	medical hypotheses	2011	10.1016/j.mehy.2011.09.006	0	NA	NA	NA	NA	NA_NA_NA_NA
vidal-martinez, g; chin, b; camarillo, c; herrera, gv; yang, b; sarosiek, i; perez, rg	a pilot microbiota study in parkinson's disease patients versus control subjects, and effects of fty720 and fty720-mitoxy therapies in parkinsonian and multiple system atrophy mouse models	journal of parkinsons disease	2020	10.3233/jpd-191693	1	1	b	b	NA	1_b_b_NA
vidal-martinez, g; chin, b; camarillo, c; herrera, gv; yang, b; sarosiek, i; perez, rg	a pilot microbiota study in parkinson's disease patients versus control subjects, and effects of fty720 and fty720-mitoxy therapies in parkinsonian and multiple system atrophy mouse models	journal of parkinsons disease	2020	10.3233/jpd-191693	1	1	b	NA	NA	1_b_NA_NA
vidal-martinez, g; chin, b; camarillo, c; herrera, gv; yang, b; sarosiek, i; perez, rg	a pilot microbiota study in parkinson's disease patients versus control subjects, and effects of fty720 and fty720-mitoxy therapies in parkinsonian and multiple system atrophy mouse models	journal of parkinsons disease	2020	10.3233/jpd-191693	1	1	NA	NA	NA	1_NA_NA_NA
finamor, dc; sinigaglia-coimbra, r; neves, lcm; gutierrez, m; silva, jj; torres, ld; surano, f; neto, dj; novo, nf; juliano, y; lopes, ac; coimbra, cg	a pilot study assessing the effect of prolonged administration of high daily doses of vitamin d on the clinical course of vitiligo and psoriasis	dermato-endocrinology	2013	10.4161/derm.24808	2	1	c	b	NA	1_c_b_NA
finamor, dc; sinigaglia-coimbra, r; neves, lcm; gutierrez, m; silva, jj; torres, ld; surano, f; neto, dj; novo, nf; juliano, y; lopes, ac; coimbra, cg	a pilot study assessing the effect of prolonged administration of high daily doses of vitamin d on the clinical course of vitiligo and psoriasis	dermato-endocrinology	2013	10.4161/derm.24808	2	1	c	NA	NA	1_c_NA_NA
finamor, dc; sinigaglia-coimbra, r; neves, lcm; gutierrez, m; silva, jj; torres, ld; surano, f; neto, dj; novo, nf; juliano, y; lopes, ac; coimbra, cg	a pilot study assessing the effect of prolonged administration of high daily doses of vitamin d on the clinical course of vitiligo and psoriasis	dermato-endocrinology	2013	10.4161/derm.24808	2	1	NA	NA	NA	1_NA_NA_NA
wingerchuk, dm; lesaux, j; rice, gpa; kremenchutzky, m; ebers, gc	a pilot study of oral calcitriol (1,25-dihydroxyvitamin d-3) for relapsing-remitting multiple sclerosis	journal of neurology neurosurgery and psychiatry	2005	10.1136/jnnp.2004.056499	23	1	c	a	NA	1_c_a_NA
wingerchuk, dm; lesaux, j; rice, gpa; kremenchutzky, m; ebers, gc	a pilot study of oral calcitriol (1,25-dihydroxyvitamin d-3) for relapsing-remitting multiple sclerosis	journal of neurology neurosurgery and psychiatry	2005	10.1136/jnnp.2004.056499	23	1	c	NA	NA	1_c_NA_NA
wingerchuk, dm; lesaux, j; rice, gpa; kremenchutzky, m; ebers, gc	a pilot study of oral calcitriol (1,25-dihydroxyvitamin d-3) for relapsing-remitting multiple sclerosis	journal of neurology neurosurgery and psychiatry	2005	10.1136/jnnp.2004.056499	23	1	NA	NA	NA	1_NA_NA_NA
gracia, mc	a possible cause and corresponding treatment for inflammatory, auto-immune or auto-aggressive diseases	medical hypotheses	2007	10.1016/j.mehy.2006.12.030	0	NA	NA	NA	NA	NA_NA_NA_NA
cymet, tc	a practical approach to fibromyalgia	journal of the national medical association	2003	NA	0	NA	NA	NA	NA	NA_NA_NA_NA
paus, t	a primer for brain imaging: a tool for evidence-based studies of nutrition?	nutrition reviews	2010	10.1111/j.1753-4887.2010.00327.x	0	NA	NA	NA	NA	NA_NA_NA_NA
swank, rl	a prospective discussion of past international nutrition catastrophes - indications for the future	nutrition	1997	10.1016/s0899-9007(97)83058-4	0	1	a	b	NA	1_a_b_NA
swank, rl	a prospective discussion of past international nutrition catastrophes - indications for the future	nutrition	1997	10.1016/s0899-9007(97)83058-4	0	1	a	NA	NA	1_a_NA_NA
swank, rl	a prospective discussion of past international nutrition catastrophes - indications for the future	nutrition	1997	10.1016/s0899-9007(97)83058-4	0	1	NA	NA	NA	1_NA_NA_NA
plow, m; finlayson, m	a qualitative study of nutritional behaviors in adults with multiple sclerosis	journal of neuroscience nursing	2012	10.1097/jnn.0b013e3182682f9b	6	1	NA	NA	NA	1_NA_NA_NA
barsevick, am; dudley, w; beek, s; sweeney, c; whitmer, k; nail, l	a randomized clinical trial of energy conservation for patients with cancer-related fatigue	cancer	2004	10.1002/cncr.20111	0	NA	NA	NA	NA	NA_NA_NA_NA
razeghi-jahromi, s; doosti, r; ghorbani, z; saeedi, r; abolhasani, m; akbari, n; cheraghi-serkani, f; moghadasi, an; azimi, a; togha, m; sahraian, ma	a randomized controlled trial investigating the effects of a mediterranean-like diet in patients with multiple sclerosis-associated cognitive impairments and fatigue	current journal of neurology	2020	10.18502/CJN.V19I3.5424	0	1	a	a	a	1_a_a_a
razeghi-jahromi, s; doosti, r; ghorbani, z; saeedi, r; abolhasani, m; akbari, n; cheraghi-serkani, f; moghadasi, an; azimi, a; togha, m; sahraian, ma	a randomized controlled trial investigating the effects of a mediterranean-like diet in patients with multiple sclerosis-associated cognitive impairments and fatigue	current journal of neurology	2020	10.18502/CJN.V19I3.5424	0	1	a	a	NA	1_a_a_NA
razeghi-jahromi, s; doosti, r; ghorbani, z; saeedi, r; abolhasani, m; akbari, n; cheraghi-serkani, f; moghadasi, an; azimi, a; togha, m; sahraian, ma	a randomized controlled trial investigating the effects of a mediterranean-like diet in patients with multiple sclerosis-associated cognitive impairments and fatigue	current journal of neurology	2020	10.18502/CJN.V19I3.5424	0	1	a	NA	NA	1_a_NA_NA
razeghi-jahromi, s; doosti, r; ghorbani, z; saeedi, r; abolhasani, m; akbari, n; cheraghi-serkani, f; moghadasi, an; azimi, a; togha, m; sahraian, ma	a randomized controlled trial investigating the effects of a mediterranean-like diet in patients with multiple sclerosis-associated cognitive impairments and fatigue	current journal of neurology	2020	10.18502/CJN.V19I3.5424	0	1	NA	NA	NA	1_NA_NA_NA
panchal, m; jethva, m; trivedi, a; patel, p; yadav, m	a rare case of: marchiafava-bignami disease	journal of evolution of medical and dental sciences-jemds	2014	10.14260/jemds/2014/3333	0	NA	NA	NA	NA	NA_NA_NA_NA
rousseaux, cg	a review of glutamate receptors ii: pathophysiology and pathology	journal of toxicologic pathology	2008	10.1293/tox.21.133	0	NA	NA	NA	NA	NA_NA_NA_NA
murrell, tgc; harbige, ls; robinson, ic	a review of the etiology of multiple-sclerosis - an ecological approach	annals of human biology	1991	10.1080/03014469100001442	2	1	a	b	NA	1_a_b_NA
murrell, tgc; harbige, ls; robinson, ic	a review of the etiology of multiple-sclerosis - an ecological approach	annals of human biology	1991	10.1080/03014469100001442	2	1	a	NA	NA	1_a_NA_NA
murrell, tgc; harbige, ls; robinson, ic	a review of the etiology of multiple-sclerosis - an ecological approach	annals of human biology	1991	10.1080/03014469100001442	2	1	NA	NA	NA	1_NA_NA_NA
davis, j; eyre, h; jacka, fn; dodd, s; dean, o; mcewen, s; debnath, m; mcgrath, j; maes, m; amminger, p; mcgorry, pd; pantelis, c; berk, m	a review of vulnerability and risks for schizophrenia: beyond the two hit hypothesis	neuroscience and biobehavioral reviews	2016	10.1016/j.neubiorev.2016.03.017	0	NA	NA	NA	NA	NA_NA_NA_NA
rawat, k; singh, n; kumari, p; saha, l	a review on preventive role of ketogenic diet (kd) in cns disorders from the gut microbiota perspective	reviews in the neurosciences	2021	10.1515/revneuro-2020-0078	0	1	b	b	NA	1_b_b_NA
rawat, k; singh, n; kumari, p; saha, l	a review on preventive role of ketogenic diet (kd) in cns disorders from the gut microbiota perspective	reviews in the neurosciences	2021	10.1515/revneuro-2020-0078	0	1	b	NA	NA	1_b_NA_NA
rawat, k; singh, n; kumari, p; saha, l	a review on preventive role of ketogenic diet (kd) in cns disorders from the gut microbiota perspective	reviews in the neurosciences	2021	10.1515/revneuro-2020-0078	0	1	NA	NA	NA	1_NA_NA_NA
molzer, c; wilson, hm; kuffova, l; forrester, jv	a role for folate in microbiome-linked control of autoimmunity	journal of immunology research	2021	10.1155/2021/9998200	0	1	NA	NA	NA	1_NA_NA_NA
torkildsen, o; brunborg, la; milde, am; mork, sj; myhr, km; bo, l	a salmon based diet protects mice from behavioural changes in the cuprizone model for demyelination	clinical nutrition	2009	10.1016/j.clnu.2008.10.015	3	1	a	b	NA	1_a_b_NA
torkildsen, o; brunborg, la; milde, am; mork, sj; myhr, km; bo, l	a salmon based diet protects mice from behavioural changes in the cuprizone model for demyelination	clinical nutrition	2009	10.1016/j.clnu.2008.10.015	3	1	a	NA	NA	1_a_NA_NA
torkildsen, o; brunborg, la; milde, am; mork, sj; myhr, km; bo, l	a salmon based diet protects mice from behavioural changes in the cuprizone model for demyelination	clinical nutrition	2009	10.1016/j.clnu.2008.10.015	3	1	NA	NA	NA	1_NA_NA_NA
petrin, j; fiander, mdj; doss, pmia; yeh, ea	a scoping review of modifiable risk factors in pediatric onset multiple sclerosis: building for the future	children-basel	2018	10.3390/children5110146	0	1	b	a	NA	1_b_a_NA
petrin, j; fiander, mdj; doss, pmia; yeh, ea	a scoping review of modifiable risk factors in pediatric onset multiple sclerosis: building for the future	children-basel	2018	10.3390/children5110146	0	1	b	NA	NA	1_b_NA_NA
petrin, j; fiander, mdj; doss, pmia; yeh, ea	a scoping review of modifiable risk factors in pediatric onset multiple sclerosis: building for the future	children-basel	2018	10.3390/children5110146	0	1	NA	NA	NA	1_NA_NA_NA
brenton, jn; goldman, md	a study of dietary modification: perceptions and attitudes of patients with multiple sclerosis	multiple sclerosis and related disorders	2016	10.1016/j.msard.2016.04.009	13	1	a	a	a	1_a_a_a
brenton, jn; goldman, md	a study of dietary modification: perceptions and attitudes of patients with multiple sclerosis	multiple sclerosis and related disorders	2016	10.1016/j.msard.2016.04.009	13	1	a	a	NA	1_a_a_NA
brenton, jn; goldman, md	a study of dietary modification: perceptions and attitudes of patients with multiple sclerosis	multiple sclerosis and related disorders	2016	10.1016/j.msard.2016.04.009	13	1	a	NA	NA	1_a_NA_NA
brenton, jn; goldman, md	a study of dietary modification: perceptions and attitudes of patients with multiple sclerosis	multiple sclerosis and related disorders	2016	10.1016/j.msard.2016.04.009	13	1	NA	NA	NA	1_NA_NA_NA
fitzgerald, kc; tyry, t; salter, a; cofield, ss; cutter, g; fox, rj; marrie, ra	a survey of dietary characteristics in a large population of people with multiple sclerosis	multiple sclerosis and related disorders	2018	10.1016/j.msard.2018.02.019	17	1	a	a	a	1_a_a_a
fitzgerald, kc; tyry, t; salter, a; cofield, ss; cutter, g; fox, rj; marrie, ra	a survey of dietary characteristics in a large population of people with multiple sclerosis	multiple sclerosis and related disorders	2018	10.1016/j.msard.2018.02.019	17	1	a	a	NA	1_a_a_NA
fitzgerald, kc; tyry, t; salter, a; cofield, ss; cutter, g; fox, rj; marrie, ra	a survey of dietary characteristics in a large population of people with multiple sclerosis	multiple sclerosis and related disorders	2018	10.1016/j.msard.2018.02.019	17	1	a	NA	NA	1_a_NA_NA
fitzgerald, kc; tyry, t; salter, a; cofield, ss; cutter, g; fox, rj; marrie, ra	a survey of dietary characteristics in a large population of people with multiple sclerosis	multiple sclerosis and related disorders	2018	10.1016/j.msard.2018.02.019	17	1	NA	NA	NA	1_NA_NA_NA
harirchian, mh; mohammadpour, z; fatehi, f; firoozeh, n; bitarafan, s	a systematic review and meta-analysis of randomized controlled trials to evaluating the trend of cytokines to vitamin a supplementation in autoimmune diseases	clinical nutrition	2019	10.1016/j.clnu.2018.10.026	0	NA	NA	NA	NA	NA_NA_NA_NA
plow, ma; moore, s; husni, me; kirwan, jp	a systematic review of behavioural techniques used in nutrition and weight loss interventions among adults with mobility-impairing neurological and musculoskeletal conditions	obesity reviews	2014	10.1111/obr.12223	1	1	NA	NA	NA	1_NA_NA_NA
pozuelo-moyano, b; benito-leon, j; mitchell, aj; hernandez-gallego, j	a systematic review of randomized, double-blind, placebo-controlled trials examining the clinical efficacy of vitamin d in multiple sclerosis	neuroepidemiology	2013	10.1159/000345122	8	1	a	a	b	1_a_a_b
pozuelo-moyano, b; benito-leon, j; mitchell, aj; hernandez-gallego, j	a systematic review of randomized, double-blind, placebo-controlled trials examining the clinical efficacy of vitamin d in multiple sclerosis	neuroepidemiology	2013	10.1159/000345122	8	1	a	a	NA	1_a_a_NA
pozuelo-moyano, b; benito-leon, j; mitchell, aj; hernandez-gallego, j	a systematic review of randomized, double-blind, placebo-controlled trials examining the clinical efficacy of vitamin d in multiple sclerosis	neuroepidemiology	2013	10.1159/000345122	8	1	a	NA	NA	1_a_NA_NA
pozuelo-moyano, b; benito-leon, j; mitchell, aj; hernandez-gallego, j	a systematic review of randomized, double-blind, placebo-controlled trials examining the clinical efficacy of vitamin d in multiple sclerosis	neuroepidemiology	2013	10.1159/000345122	8	1	NA	NA	NA	1_NA_NA_NA
keage, m; delatycki, m; corben, l; vogel, a	a systematic review of self-reported swallowing assessments in progressive neurological disorders	dysphagia	2015	10.1007/s00455-014-9579-9	1	4	NA	NA	NA	4_NA_NA_NA
probst, y; mowbray, e; svensen, e; thompson, k	a systematic review of the impact of dietary sodium on autoimmunity and inflammation related to multiple sclerosis	advances in nutrition	2019	10.1093/advances/nmz032	0	1	b	a	NA	1_b_a_NA
probst, y; mowbray, e; svensen, e; thompson, k	a systematic review of the impact of dietary sodium on autoimmunity and inflammation related to multiple sclerosis	advances in nutrition	2019	10.1093/advances/nmz032	0	1	b	NA	NA	1_b_NA_NA
probst, y; mowbray, e; svensen, e; thompson, k	a systematic review of the impact of dietary sodium on autoimmunity and inflammation related to multiple sclerosis	advances in nutrition	2019	10.1093/advances/nmz032	0	1	NA	NA	NA	1_NA_NA_NA
royal, w; wang, hy; jones, o; tran, h; bryant, jl	a vitamin a deficient diet enhances proinflammatory cytokine, mu opioid receptor, and hiv-1 expression in the hiv-1 transgenic rat	journal of neuroimmunology	2007	10.1016/j.jneuroim.2007.01.001	0	NA	NA	NA	NA	NA_NA_NA_NA
kim, h; langley, mr; simon, wl; yoon, h; kleppe, l; lanza, ir; lebrasseur, nk; matveyenko, a; scarisbrick, ia	a western diet impairs cns energy homeostasis and recovery after spinal cord injury: link to astrocyte metabolism	neurobiology of disease	2020	10.1016/j.nbd.2020.104934	1	1	b	d	NA	1_b_d_NA
kim, h; langley, mr; simon, wl; yoon, h; kleppe, l; lanza, ir; lebrasseur, nk; matveyenko, a; scarisbrick, ia	a western diet impairs cns energy homeostasis and recovery after spinal cord injury: link to astrocyte metabolism	neurobiology of disease	2020	10.1016/j.nbd.2020.104934	1	1	b	NA	NA	1_b_NA_NA
kim, h; langley, mr; simon, wl; yoon, h; kleppe, l; lanza, ir; lebrasseur, nk; matveyenko, a; scarisbrick, ia	a western diet impairs cns energy homeostasis and recovery after spinal cord injury: link to astrocyte metabolism	neurobiology of disease	2020	10.1016/j.nbd.2020.104934	1	1	NA	NA	NA	1_NA_NA_NA
salvati, s; sanchez, m; campeggi, lm; suchanek, g; breitschop, h; lassmann, h	accelerated myelinogenesis by dietary lipids in rat brain	journal of neurochemistry	1996	10.1046/j.1471-4159.1996.67041744.x	1	2	NA	NA	NA	2_NA_NA_NA
manns, p; ezeugwu, v; armijo-olivo, s; vallance, j; healy, gn	accelerometer-derived pattern of sedentary and physical activity time in persons with mobility disability: national health and nutrition examination survey 2003 to 2006	journal of the american geriatrics society	2015	10.1111/jgs.13490	0	NA	NA	NA	NA	NA_NA_NA_NA
famularo, g; moretti, s; marcellini, s; trinchieri, v; tzantzoglou, s; santini, g; longo, a; desimone, c	acetyl-carnitine deficiency in aids patients with neurotoxicity on treatment with antiretroviral nucleoside analogues	aids	1997	10.1097/00002030-199702000-00008	0	NA	NA	NA	NA	NA_NA_NA_NA
calle, e; berciano, mt; fernandez, r; lafarga, m	activation of the autophagy, c-fos and ubiquitin expression, and nucleolar alterations in schwann cells precede demyelination in tellurium-induced neuropathy	acta neuropathologica	1999	10.1007/s004010050967	1	NA	NA	NA	NA	NA_NA_NA_NA
izumi, m; akifusa, s; ganaha, s; yamashita, y	activities of daily living decline is a predictor of lowered coughing ability and correlates with rehabilitative effect of tongue cleaning on coughing ability	odontology	2019	10.1007/s10266-019-00415-9	0	NA	NA	NA	NA	NA_NA_NA_NA
rezapour-firouzi, s; arefhosseini, sr; ebrahimi-mamaghani, m; baradaran, b; sadeghihokmabad, e; torbati, m; mostafaei, s; chehreh, m; zamani, f	activity of liver enzymes in multiple sclerosis patients with hot-nature diet and co-supplemented hemp seed, evening primrose oils intervention	complementary therapies in medicine	2014	10.1016/j.ctim.2014.10.004	8	1	a	a	b	1_a_a_b
rezapour-firouzi, s; arefhosseini, sr; ebrahimi-mamaghani, m; baradaran, b; sadeghihokmabad, e; torbati, m; mostafaei, s; chehreh, m; zamani, f	activity of liver enzymes in multiple sclerosis patients with hot-nature diet and co-supplemented hemp seed, evening primrose oils intervention	complementary therapies in medicine	2014	10.1016/j.ctim.2014.10.004	8	1	a	a	NA	1_a_a_NA
rezapour-firouzi, s; arefhosseini, sr; ebrahimi-mamaghani, m; baradaran, b; sadeghihokmabad, e; torbati, m; mostafaei, s; chehreh, m; zamani, f	activity of liver enzymes in multiple sclerosis patients with hot-nature diet and co-supplemented hemp seed, evening primrose oils intervention	complementary therapies in medicine	2014	10.1016/j.ctim.2014.10.004	8	1	a	NA	NA	1_a_NA_NA
rezapour-firouzi, s; arefhosseini, sr; ebrahimi-mamaghani, m; baradaran, b; sadeghihokmabad, e; torbati, m; mostafaei, s; chehreh, m; zamani, f	activity of liver enzymes in multiple sclerosis patients with hot-nature diet and co-supplemented hemp seed, evening primrose oils intervention	complementary therapies in medicine	2014	10.1016/j.ctim.2014.10.004	8	1	NA	NA	NA	1_NA_NA_NA
schultz, v; van der meer, f; wrzos, c; scheidt, u; bahn, e; stadelmann, c; bruck, w; junker, a	acutely damaged axons are remyelinated in multiple sclerosis and experimental models of demyelination	glia	2017	10.1002/glia.23167	3	2	b	NA	NA	2_b_NA_NA
schultz, v; van der meer, f; wrzos, c; scheidt, u; bahn, e; stadelmann, c; bruck, w; junker, a	acutely damaged axons are remyelinated in multiple sclerosis and experimental models of demyelination	glia	2017	10.1002/glia.23167	3	2	NA	NA	NA	2_NA_NA_NA
bynoe, ms; viret, c; yan, a; kim, dg	adenosine receptor signaling: a key to opening the blood-brain door	fluids and barriers of the cns	2015	10.1186/s12987-015-0017-7	0	NA	NA	NA	NA	NA_NA_NA_NA
thundyil, j; pavlovski, d; sobey, cg; arumugam, tv	adiponectin receptor signalling in the brain	british journal of pharmacology	2012	10.1111/j.1476-5381.2011.01560.x	1	1	b	d	NA	1_b_d_NA
thundyil, j; pavlovski, d; sobey, cg; arumugam, tv	adiponectin receptor signalling in the brain	british journal of pharmacology	2012	10.1111/j.1476-5381.2011.01560.x	1	1	b	NA	NA	1_b_NA_NA
thundyil, j; pavlovski, d; sobey, cg; arumugam, tv	adiponectin receptor signalling in the brain	british journal of pharmacology	2012	10.1111/j.1476-5381.2011.01560.x	1	1	NA	NA	NA	1_NA_NA_NA
khanna, s; walia, s; kondepudi, kk; shukla, g	administration of indigenous probiotics modulate high-fat diet-induced metabolic syndrome in sprague dawley rats	antonie van leeuwenhoek international journal of general and molecular microbiology	2020	10.1007/s10482-020-01445-y	0	NA	NA	NA	NA	NA_NA_NA_NA
cappa, m; bertini, e; cambiaso, p; delbalzo, p; dicapua, m; milani, l; bardelli, p; rimoldi, m; uziel, g	adrenoleukodystrophy - clinical and therapeutic aspects in the italian experience	rivista italiana di pediatria-italian journal of pediatrics	1994	NA	0	NA	NA	NA	NA	NA_NA_NA_NA
joshi, m; clark, we; uphoff, df	adrenoneuropathy - characteristic gross findings and association with hashimoto thyroiditis and accelerated atherosclerosis	modern pathology	1991	NA	0	NA	NA	NA	NA	NA_NA_NA_NA
viader, f; chapon, f; dao, t; rivrain, y; lechevalier, b	adult celiac-disease revealed by a sensory-motor neuropathy	presse medicale	1995	NA	0	NA	NA	NA	NA	NA_NA_NA_NA
crabtree-hartman, e	advanced symptom management in multiple sclerosis	neurologic clinics	2018	10.1016/j.ncl.2017.08.015	1	1	a	a	a	1_a_a_a
crabtree-hartman, e	advanced symptom management in multiple sclerosis	neurologic clinics	2018	10.1016/j.ncl.2017.08.015	1	1	a	a	NA	1_a_a_NA
crabtree-hartman, e	advanced symptom management in multiple sclerosis	neurologic clinics	2018	10.1016/j.ncl.2017.08.015	1	1	a	NA	NA	1_a_NA_NA
crabtree-hartman, e	advanced symptom management in multiple sclerosis	neurologic clinics	2018	10.1016/j.ncl.2017.08.015	1	1	NA	NA	NA	1_NA_NA_NA
miller, e; wachowicz, b; majsterek, i	advances in antioxidative therapy of multiple sclerosis	current medicinal chemistry	2013	10.2174/09298673113209990156	3	1	c	NA	NA	1_c_NA_NA
miller, e; wachowicz, b; majsterek, i	advances in antioxidative therapy of multiple sclerosis	current medicinal chemistry	2013	10.2174/09298673113209990156	3	1	NA	NA	NA	1_NA_NA_NA
yadav, sk; mindur, je; ito, k; dhib-jalbut, s	advances in the immunopathogenesis of multiple sclerosis	current opinion in neurology	2015	10.1097/wco.0000000000000205	3	1	b	a	NA	1_b_a_NA
yadav, sk; mindur, je; ito, k; dhib-jalbut, s	advances in the immunopathogenesis of multiple sclerosis	current opinion in neurology	2015	10.1097/wco.0000000000000205	3	1	b	NA	NA	1_b_NA_NA
yadav, sk; mindur, je; ito, k; dhib-jalbut, s	advances in the immunopathogenesis of multiple sclerosis	current opinion in neurology	2015	10.1097/wco.0000000000000205	3	1	NA	NA	NA	1_NA_NA_NA
prasad, s; sung, b; aggarwal, bb	age-associated chronic diseases require age-old medicine: role of chronic inflammation	preventive medicine	2012	10.1016/j.ypmed.2011.11.011	0	1	a	a	a	1_a_a_a
prasad, s; sung, b; aggarwal, bb	age-associated chronic diseases require age-old medicine: role of chronic inflammation	preventive medicine	2012	10.1016/j.ypmed.2011.11.011	0	1	a	a	NA	1_a_a_NA
prasad, s; sung, b; aggarwal, bb	age-associated chronic diseases require age-old medicine: role of chronic inflammation	preventive medicine	2012	10.1016/j.ypmed.2011.11.011	0	1	a	NA	NA	1_a_NA_NA
prasad, s; sung, b; aggarwal, bb	age-associated chronic diseases require age-old medicine: role of chronic inflammation	preventive medicine	2012	10.1016/j.ypmed.2011.11.011	0	1	NA	NA	NA	1_NA_NA_NA
doucette, jr; jiao, rb; nazarali, aj	age-related and cuprizone-induced changes in myelin and transcription factor gene expression and in oligodendrocyte cell densities in the rostral corpus callosum of mice	cellular and molecular neurobiology	2010	10.1007/s10571-009-9486-z	3	2	a	NA	NA	2_a_NA_NA
doucette, jr; jiao, rb; nazarali, aj	age-related and cuprizone-induced changes in myelin and transcription factor gene expression and in oligodendrocyte cell densities in the rostral corpus callosum of mice	cellular and molecular neurobiology	2010	10.1007/s10571-009-9486-z	3	2	NA	NA	NA	2_NA_NA_NA
balfour, hh; sifakis, f; sliman, ja; knight, ja; schmeling, do; thomas, w	age-specific prevalence of epstein-barr virus infection among individuals aged 6-19 years in the united states and factors affecting its acquisition	journal of infectious diseases	2013	10.1093/infdis/jit321	0	NA	NA	NA	NA	NA_NA_NA_NA
manini, tm; hong, sl; clark, bc	aging and muscle: a neuron's perspective	current opinion in clinical nutrition and metabolic care	2013	10.1097/mco.0b013e32835b5880	0	NA	NA	NA	NA	NA_NA_NA_NA
azizov, v; zaiss, mm	alcohol consumption in rheumatoid arthritis: a path through the immune system	nutrients	2021	10.3390/nu13041324	0	1	b	c	NA	1_b_c_NA
azizov, v; zaiss, mm	alcohol consumption in rheumatoid arthritis: a path through the immune system	nutrients	2021	10.3390/nu13041324	0	1	b	NA	NA	1_b_NA_NA
azizov, v; zaiss, mm	alcohol consumption in rheumatoid arthritis: a path through the immune system	nutrients	2021	10.3390/nu13041324	0	1	NA	NA	NA	1_NA_NA_NA
caslin, b; maguire, c; karmakar, a; mohler, k; wylie, d; melamed, e	alcohol shifts gut microbial networks and ameliorates a murine model of neuroinflammation in a sexspecific pattern	proceedings of the national academy of sciences of the united states of america	2019	10.1073/pnas.1912359116	1	1	b	c	NA	1_b_c_NA
caslin, b; maguire, c; karmakar, a; mohler, k; wylie, d; melamed, e	alcohol shifts gut microbial networks and ameliorates a murine model of neuroinflammation in a sexspecific pattern	proceedings of the national academy of sciences of the united states of america	2019	10.1073/pnas.1912359116	1	1	b	NA	NA	1_b_NA_NA
caslin, b; maguire, c; karmakar, a; mohler, k; wylie, d; melamed, e	alcohol shifts gut microbial networks and ameliorates a murine model of neuroinflammation in a sexspecific pattern	proceedings of the national academy of sciences of the united states of america	2019	10.1073/pnas.1912359116	1	1	NA	NA	NA	1_NA_NA_NA
chen, mh; cheng, ca	alcoholic ketoacidosis coincides with acute marchiafava-bignami disease	american journal of emergency medicine	2012	10.1016/j.ajem.2011.12.021	0	NA	NA	NA	NA	NA_NA_NA_NA
de sousa, cns; leite, cmgd; medeiros, id; vasconcelos, lc; cabral, lm; patrocinio, cfv; patrocinio, mlv; mouaffak, f; kebir, o; macedo, d; patrocinio, mca; vasconcelos, smm	alpha-lipoic acid in the treatment of psychiatric and neurological disorders: a systematic review	metabolic brain disease	2019	10.1007/s11011-018-0344-x	1	1	a	a	a	1_a_a_a
de sousa, cns; leite, cmgd; medeiros, id; vasconcelos, lc; cabral, lm; patrocinio, cfv; patrocinio, mlv; mouaffak, f; kebir, o; macedo, d; patrocinio, mca; vasconcelos, smm	alpha-lipoic acid in the treatment of psychiatric and neurological disorders: a systematic review	metabolic brain disease	2019	10.1007/s11011-018-0344-x	1	1	a	a	NA	1_a_a_NA
de sousa, cns; leite, cmgd; medeiros, id; vasconcelos, lc; cabral, lm; patrocinio, cfv; patrocinio, mlv; mouaffak, f; kebir, o; macedo, d; patrocinio, mca; vasconcelos, smm	alpha-lipoic acid in the treatment of psychiatric and neurological disorders: a systematic review	metabolic brain disease	2019	10.1007/s11011-018-0344-x	1	1	a	NA	NA	1_a_NA_NA
de sousa, cns; leite, cmgd; medeiros, id; vasconcelos, lc; cabral, lm; patrocinio, cfv; patrocinio, mlv; mouaffak, f; kebir, o; macedo, d; patrocinio, mca; vasconcelos, smm	alpha-lipoic acid in the treatment of psychiatric and neurological disorders: a systematic review	metabolic brain disease	2019	10.1007/s11011-018-0344-x	1	1	NA	NA	NA	1_NA_NA_NA
xue, hk; ren, hj; zhang, l; sun, xx; wang, wh; zhang, sj; zhao, jw; ming, l	alpha-tocopherol ameliorates experimental autoimmune encephalomyelitis through the regulation of th1 cells	iranian journal of basic medical sciences	2016	NA	6	1	b	a	NA	1_b_a_NA
xue, hk; ren, hj; zhang, l; sun, xx; wang, wh; zhang, sj; zhao, jw; ming, l	alpha-tocopherol ameliorates experimental autoimmune encephalomyelitis through the regulation of th1 cells	iranian journal of basic medical sciences	2016	NA	6	1	b	NA	NA	1_b_NA_NA
xue, hk; ren, hj; zhang, l; sun, xx; wang, wh; zhang, sj; zhao, jw; ming, l	alpha-tocopherol ameliorates experimental autoimmune encephalomyelitis through the regulation of th1 cells	iranian journal of basic medical sciences	2016	NA	6	1	NA	NA	NA	1_NA_NA_NA
rezapour-firouzi, s; arefhosseini, sr; ebrahimi-mamaghani, m; baradaran, b; sadeghihokmabad, e; mostafaei, s; torbati, m; chehreh, m	alteration of delta-6-desaturase (fads2), secretory phospholipase-a2 (spla2) enzymes by hot-nature diet with co-supplemented hemp seed, evening primrose oils intervention in multiple sclerosis patients	complementary therapies in medicine	2015	10.1016/j.ctim.2015.07.003	5	1	a	a	b	1_a_a_b
rezapour-firouzi, s; arefhosseini, sr; ebrahimi-mamaghani, m; baradaran, b; sadeghihokmabad, e; mostafaei, s; torbati, m; chehreh, m	alteration of delta-6-desaturase (fads2), secretory phospholipase-a2 (spla2) enzymes by hot-nature diet with co-supplemented hemp seed, evening primrose oils intervention in multiple sclerosis patients	complementary therapies in medicine	2015	10.1016/j.ctim.2015.07.003	5	1	a	a	NA	1_a_a_NA
rezapour-firouzi, s; arefhosseini, sr; ebrahimi-mamaghani, m; baradaran, b; sadeghihokmabad, e; mostafaei, s; torbati, m; chehreh, m	alteration of delta-6-desaturase (fads2), secretory phospholipase-a2 (spla2) enzymes by hot-nature diet with co-supplemented hemp seed, evening primrose oils intervention in multiple sclerosis patients	complementary therapies in medicine	2015	10.1016/j.ctim.2015.07.003	5	1	a	NA	NA	1_a_NA_NA
rezapour-firouzi, s; arefhosseini, sr; ebrahimi-mamaghani, m; baradaran, b; sadeghihokmabad, e; mostafaei, s; torbati, m; chehreh, m	alteration of delta-6-desaturase (fads2), secretory phospholipase-a2 (spla2) enzymes by hot-nature diet with co-supplemented hemp seed, evening primrose oils intervention in multiple sclerosis patients	complementary therapies in medicine	2015	10.1016/j.ctim.2015.07.003	5	1	NA	NA	NA	1_NA_NA_NA
zamaria, n	alteration of polyunsaturated fatty acid status and metabolism in health and disease	reproduction nutrition development	2004	10.1051/rnd:2004034	2	1	a	b	NA	1_a_b_NA
zamaria, n	alteration of polyunsaturated fatty acid status and metabolism in health and disease	reproduction nutrition development	2004	10.1051/rnd:2004034	2	1	a	NA	NA	1_a_NA_NA
zamaria, n	alteration of polyunsaturated fatty acid status and metabolism in health and disease	reproduction nutrition development	2004	10.1051/rnd:2004034	2	1	NA	NA	NA	1_NA_NA_NA
minich, d; madden, c; evans, mv; ballash, ga; barr, dj; poulsen, kp; dennis, pm; hale, vl	alterations in gut microbiota linked to provenance, sex, and chronic wasting disease in white-tailed deer (odocoileus virginianus)	scientific reports	2021	10.1038/s41598-021-89896-9	0	1	b	b	NA	1_b_b_NA
minich, d; madden, c; evans, mv; ballash, ga; barr, dj; poulsen, kp; dennis, pm; hale, vl	alterations in gut microbiota linked to provenance, sex, and chronic wasting disease in white-tailed deer (odocoileus virginianus)	scientific reports	2021	10.1038/s41598-021-89896-9	0	1	b	NA	NA	1_b_NA_NA
minich, d; madden, c; evans, mv; ballash, ga; barr, dj; poulsen, kp; dennis, pm; hale, vl	alterations in gut microbiota linked to provenance, sex, and chronic wasting disease in white-tailed deer (odocoileus virginianus)	scientific reports	2021	10.1038/s41598-021-89896-9	0	1	NA	NA	NA	1_NA_NA_NA
hou, yc; yang, sh; wu, yt; lai, ch	alterations of neocortico-limbic association fibers and correlation with diet in prediabetes diagnosed by impaired fasting glucose	journal of magnetic resonance imaging	2016	10.1002/jmri.25127	0	NA	NA	NA	NA	NA_NA_NA_NA
surendran, s; matalon, d; tyring, sk; rady, pl; velagaleti, gv; matalon, r	altered expression of myocilin in the brain of a mouse model for phenylketonuria (pku)	neuroscience letters	2005	10.1016/j.neulet.2005.03.030	0	NA	NA	NA	NA	NA_NA_NA_NA
beauchesne, e; desjardins, p; hazell, as; butterworth, rf	altered expression of tight junction proteins and matrix metalloproteinases in thiamine-deficient mouse brain	neurochemistry international	2009	10.1016/j.neuint.2009.03.014	0	NA	NA	NA	NA	NA_NA_NA_NA
schwarz, s; leweling, h; meinck, hm	alternative and complementary therapies in multiple sclerosis	fortschritte der neurologie psychiatrie	2005	10.1055/s-2004-830248	3	1	a	b	NA	1_a_b_NA
schwarz, s; leweling, h; meinck, hm	alternative and complementary therapies in multiple sclerosis	fortschritte der neurologie psychiatrie	2005	10.1055/s-2004-830248	3	1	a	NA	NA	1_a_NA_NA
schwarz, s; leweling, h; meinck, hm	alternative and complementary therapies in multiple sclerosis	fortschritte der neurologie psychiatrie	2005	10.1055/s-2004-830248	3	1	NA	NA	NA	1_NA_NA_NA
paulig, m	alternative medicine and multiple sclerosis	nervenheilkunde	2008	NA	0	1	a	b	NA	1_a_b_NA
paulig, m	alternative medicine and multiple sclerosis	nervenheilkunde	2008	NA	0	1	a	NA	NA	1_a_NA_NA
paulig, m	alternative medicine and multiple sclerosis	nervenheilkunde	2008	NA	0	1	NA	NA	NA	1_NA_NA_NA
khan, sa; khan, sa; narendra, ar; mushtaq, g; zahran, sa; khan, s; kamal, ma	alzheimer's disease and autistic spectrum disorder: is there any association?	cns & neurological disorders-drug targets	2016	10.2174/1871527315666160321104303	0	NA	NA	NA	NA	NA_NA_NA_NA
brenner, sr	alzheimer's disease and other neurodegenerative diseases may be due to nutritional deficiencies secondary to unrecognized exocrine pancreatic insufficiency	medical hypotheses	2017	10.1016/j.mehy.2017.03.020	0	NA	NA	NA	NA	NA_NA_NA_NA
o'driscoll, ca; owens, la; hoffmann, ej; gallo, me; afrazi, a; han, m; fechner, jh; schauer, jj; bradfield, ca; mezrich, jd	ambient urban dust particulate matter reduces pathologic t cells in the cns and severity of eae	environmental research	2019	10.1016/j.envres.2018.09.038	0	NA	NA	NA	NA	NA_NA_NA_NA
zhang, n; liu, ch; zhang, ry; jin, l; yin, xh; zheng, xx; siebert, hc; li, yb; wang, zp; loers, g; petridis, ak	amelioration of clinical course and demyelination in the cuprizone mouse model in relation to ketogenic diet	food & function	2020	10.1039/c9fo02944c	2	2	a	NA	NA	2_a_NA_NA
zhang, n; liu, ch; zhang, ry; jin, l; yin, xh; zheng, xx; siebert, hc; li, yb; wang, zp; loers, g; petridis, ak	amelioration of clinical course and demyelination in the cuprizone mouse model in relation to ketogenic diet	food & function	2020	10.1039/c9fo02944c	2	2	NA	NA	NA	2_NA_NA_NA
lee, dw; heo, h; woo, dc; kim, jk; lee, dh	amide proton transfer-weighted 7-t mri contrast of myelination after cuprizone administration	radiology	2021	10.1148/radiol.2021203766	0	2	a	NA	NA	2_a_NA_NA
lee, dw; heo, h; woo, dc; kim, jk; lee, dh	amide proton transfer-weighted 7-t mri contrast of myelination after cuprizone administration	radiology	2021	10.1148/radiol.2021203766	0	2	NA	NA	NA	2_NA_NA_NA
wang, yz; kou, sa; tang, jc; zhang, p; zhang, qx; liu, y; zheng, q; zhao, h; wang, l	amyloid precursor protein and growth-associated protein 43 expression in brain white matter and spinal cord tissues in a rat model of experimental autoimmune encephalomyelitis	neural regeneration research	2011	10.3969/j.issn.1673-5374.2011.02.004	0	NA	NA	NA	NA	NA_NA_NA_NA
ashtari, f; esmaeil, n; mansourian, m; poursafa, p; mirmosayyeb, o; barzegar, m; pourgheisari, h	an 8-year study of people with multiple sclerosis in isfahan, iran: association between environmental air pollutants and severity of disease	journal of neuroimmunology	2018	10.1016/j.jneuroim.2018.02.019	0	NA	NA	NA	NA	NA_NA_NA_NA
malojcic, b; brinar, v; poser, c; djakovic, v	an adult case of leigh disease	clinical neurology and neurosurgery	2004	10.1016/j.clineuro.2004.02.028	0	NA	NA	NA	NA	NA_NA_NA_NA
zhang, n; jin, l; liu, ch; zhang, ry; siebert, hc; li, yh; loers, g; petridis, ak; xia, zy; dong, hj; zheng, xx	an antarctic krill oil-based diet elicits neuroprotective effects by inhibiting oxidative stress and rebalancing the m1/m2 microglia phenotype in a cuprizone model for demyelination	journal of functional foods	2021	10.1016/j.jff.2020.104309	0	2	a	NA	NA	2_a_NA_NA
zhang, n; jin, l; liu, ch; zhang, ry; siebert, hc; li, yh; loers, g; petridis, ak; xia, zy; dong, hj; zheng, xx	an antarctic krill oil-based diet elicits neuroprotective effects by inhibiting oxidative stress and rebalancing the m1/m2 microglia phenotype in a cuprizone model for demyelination	journal of functional foods	2021	10.1016/j.jff.2020.104309	0	2	NA	NA	NA	2_NA_NA_NA
labuschagne, il; blaauw, r	an anti-inflammatory approach to the dietary management of multiple sclerosis: a condensed review	south african journal of clinical nutrition	2018	10.1080/16070658.2018.1465652	3	1	a	a	a	1_a_a_a
labuschagne, il; blaauw, r	an anti-inflammatory approach to the dietary management of multiple sclerosis: a condensed review	south african journal of clinical nutrition	2018	10.1080/16070658.2018.1465652	3	1	a	a	NA	1_a_a_NA
labuschagne, il; blaauw, r	an anti-inflammatory approach to the dietary management of multiple sclerosis: a condensed review	south african journal of clinical nutrition	2018	10.1080/16070658.2018.1465652	3	1	a	NA	NA	1_a_NA_NA
labuschagne, il; blaauw, r	an anti-inflammatory approach to the dietary management of multiple sclerosis: a condensed review	south african journal of clinical nutrition	2018	10.1080/16070658.2018.1465652	3	1	NA	NA	NA	1_NA_NA_NA
grant, wb	an estimate of the global reduction in mortality rates through doubling vitamin d levels	european journal of clinical nutrition	2011	10.1038/ejcn.2011.68	3	1	c	NA	NA	1_c_NA_NA
grant, wb	an estimate of the global reduction in mortality rates through doubling vitamin d levels	european journal of clinical nutrition	2011	10.1038/ejcn.2011.68	3	1	NA	NA	NA	1_NA_NA_NA
boolani, a; manierre, m	an exploratory multivariate study examining correlates of trait mental and physical fatigue and energy	fatigue-biomedicine health and behavior	2019	10.1080/21641846.2019.1573790	0	NA	NA	NA	NA	NA_NA_NA_NA
black, lj; hetherton, s; forkan, m; gonzales, eg; smith, jb; daly, a; lucas, rm; langer-gould, a	an exploratory study of diet in childhood and young adulthood and adult-onset multiple sclerosis	multiple sclerosis journal	2021	10.1177/1352458520986964	0	1	a	a	a	1_a_a_a
black, lj; hetherton, s; forkan, m; gonzales, eg; smith, jb; daly, a; lucas, rm; langer-gould, a	an exploratory study of diet in childhood and young adulthood and adult-onset multiple sclerosis	multiple sclerosis journal	2021	10.1177/1352458520986964	0	1	a	a	NA	1_a_a_NA
black, lj; hetherton, s; forkan, m; gonzales, eg; smith, jb; daly, a; lucas, rm; langer-gould, a	an exploratory study of diet in childhood and young adulthood and adult-onset multiple sclerosis	multiple sclerosis journal	2021	10.1177/1352458520986964	0	1	a	NA	NA	1_a_NA_NA
black, lj; hetherton, s; forkan, m; gonzales, eg; smith, jb; daly, a; lucas, rm; langer-gould, a	an exploratory study of diet in childhood and young adulthood and adult-onset multiple sclerosis	multiple sclerosis journal	2021	10.1177/1352458520986964	0	1	NA	NA	NA	1_NA_NA_NA
tafreshi, ap; ahmadi, a; ghaffarpur, m; mostafavi, h; rezaeizadeh, h; minaie, b; faghihzadeh, s; naseri, m	an iranian herbal-marine medicine, ms14, ameliorates experimental allergic encephalomyelitis	phytotherapy research	2008	10.1002/ptr.2459	0	NA	NA	NA	NA	NA_NA_NA_NA
de, s; gopikrishna, a; keerthana, v; girigoswami, a; girigoswami, k	an overview of nanoformulated nutraceuticals and their therapeutic approaches	current nutrition & food science	2021	10.2174/1573401316999200901120458	0	NA	NA	NA	NA	NA_NA_NA_NA
evans, e; levasseur, v; cross, ah; piccio, l	an overview of the current state of evidence for the role of specific diets in multiple sclerosis	multiple sclerosis and related disorders	2019	10.1016/j.msard.2019.101393	8	1	a	a	a	1_a_a_a
evans, e; levasseur, v; cross, ah; piccio, l	an overview of the current state of evidence for the role of specific diets in multiple sclerosis	multiple sclerosis and related disorders	2019	10.1016/j.msard.2019.101393	8	1	a	a	NA	1_a_a_NA
evans, e; levasseur, v; cross, ah; piccio, l	an overview of the current state of evidence for the role of specific diets in multiple sclerosis	multiple sclerosis and related disorders	2019	10.1016/j.msard.2019.101393	8	1	a	NA	NA	1_a_NA_NA
evans, e; levasseur, v; cross, ah; piccio, l	an overview of the current state of evidence for the role of specific diets in multiple sclerosis	multiple sclerosis and related disorders	2019	10.1016/j.msard.2019.101393	8	1	NA	NA	NA	1_NA_NA_NA
taherian, m; samadi, pm; rastegar, h; faramarzi, ma; rostami-nejad, m; yazdi, mh; rezaei-tayirani, m; yazdi, z	an overview on probiotics as an alternative strategy for prevention and treatment of human diseases	iranian journal of pharmaceutical research	2019	10.22037/ijpr.2020.112232.13620	0	1	b	c	NA	1_b_c_NA
taherian, m; samadi, pm; rastegar, h; faramarzi, ma; rostami-nejad, m; yazdi, mh; rezaei-tayirani, m; yazdi, z	an overview on probiotics as an alternative strategy for prevention and treatment of human diseases	iranian journal of pharmaceutical research	2019	10.22037/ijpr.2020.112232.13620	0	1	b	NA	NA	1_b_NA_NA
taherian, m; samadi, pm; rastegar, h; faramarzi, ma; rostami-nejad, m; yazdi, mh; rezaei-tayirani, m; yazdi, z	an overview on probiotics as an alternative strategy for prevention and treatment of human diseases	iranian journal of pharmaceutical research	2019	10.22037/ijpr.2020.112232.13620	0	1	NA	NA	NA	1_NA_NA_NA
sleeman, i; wiblin, l; burn, d	an unusual cause of falls in a young woman	journal of the royal college of physicians of edinburgh	2016	10.4997/jrcpe.2016.304	0	NA	NA	NA	NA	NA_NA_NA_NA
safaei, ha; eftekhari, sm; aliomrani, m	analysis of platelet-derived growth factor receptor a and oligodendrocyte transcription factor 2 markers following hydroxychloroquine administration in animal induced multiple sclerosis model	metabolic brain disease	2021	10.1007/s11011-021-00802-8	0	NA	NA	NA	NA	NA_NA_NA_NA
wilson, mm; anderson, de; bernstein, hd	analysis of the outer membrane proteome and secretome of bacteroides fragilis reveals a multiplicity of secretion mechanisms	plos one	2015	10.1371/journal.pone.0117732	0	NA	NA	NA	NA	NA_NA_NA_NA
friedman, m	analysis, nutrition, and health benefits of tryptophan	international journal of tryptophan research	2018	10.1177/1178646918802282	0	1	b	b	NA	1_b_b_NA
friedman, m	analysis, nutrition, and health benefits of tryptophan	international journal of tryptophan research	2018	10.1177/1178646918802282	0	1	b	NA	NA	1_b_NA_NA
friedman, m	analysis, nutrition, and health benefits of tryptophan	international journal of tryptophan research	2018	10.1177/1178646918802282	0	1	NA	NA	NA	1_NA_NA_NA
black, lj; anderson, d; clarke, mw; ponsonby, al; lucas, rm	analytical bias in the measurement of serum 25-hydroxyvitamin d concentrations impairs assessment of vitamin d status in clinical and research settings	plos one	2015	10.1371/journal.pone.0135478	2	1	a	a	a	1_a_a_a
black, lj; anderson, d; clarke, mw; ponsonby, al; lucas, rm	analytical bias in the measurement of serum 25-hydroxyvitamin d concentrations impairs assessment of vitamin d status in clinical and research settings	plos one	2015	10.1371/journal.pone.0135478	2	1	a	a	NA	1_a_a_NA
black, lj; anderson, d; clarke, mw; ponsonby, al; lucas, rm	analytical bias in the measurement of serum 25-hydroxyvitamin d concentrations impairs assessment of vitamin d status in clinical and research settings	plos one	2015	10.1371/journal.pone.0135478	2	1	a	NA	NA	1_a_NA_NA
black, lj; anderson, d; clarke, mw; ponsonby, al; lucas, rm	analytical bias in the measurement of serum 25-hydroxyvitamin d concentrations impairs assessment of vitamin d status in clinical and research settings	plos one	2015	10.1371/journal.pone.0135478	2	1	NA	NA	NA	1_NA_NA_NA
simonetti, l; agati, r; de santis, f; leonardi, m	anatomy and physiopathology of the vertebral-disc connection	rivista di neuroradiologia	2001	10.1177/19714009010140s103	0	NA	NA	NA	NA	NA_NA_NA_NA
cosentino, g; gargano, r; bonura, g; realmuto, s; tocco, e; ragonese, p; gangitano, m; alfonsi, e; fierro, b; brighina, f; salemi, g	anodal tdcs of the swallowing motor cortex for treatment of dysphagia in multiple sclerosis: a pilot open-label study	neurological sciences	2018	10.1007/s10072-018-3443-x	0	NA	NA	NA	NA	NA_NA_NA_NA
korinek, m; tsai, yh; el-shazly, m; lai, kh; backlund, a; wu, sf; lai, wc; wu, ty; chen, sl; wu, yc; cheng, yb; hwang, tl; chen, bh; chang, fr	anti-allergic hydroxy fatty acids from typhonium blumei explored through chemgps-np	frontiers in pharmacology	2017	10.3389/fphar.2017.00356	0	NA	NA	NA	NA	NA_NA_NA_NA
schroeder, m; aul, c	anti-angiogenic therapy of a renal angiomyolipoma in a seriously disabled patient suffering from multiple sclerosis	aktuelle urologie	2005	10.1055/s-2004-830254	0	NA	NA	NA	NA	NA_NA_NA_NA
pollak, ta; rogers, jp; nagele, rg; peakman, m; stone, jm; david, as; mcguire, p	antibodies in the diagnosis, prognosis, and prediction of psychotic disorders	schizophrenia bulletin	2019	10.1093/schbul/sby021	0	NA	NA	NA	NA	NA_NA_NA_NA
santangelo, c; vari, r; scazzocchio, b; de sanctis, p; giovannini, c; d'archivio, m; masella, r	anti-inflammatory activity of extra virgin olive oil polyphenols: which role in the prevention and treatment of immune-mediated inflammatory diseases?	endocrine metabolic & immune disorders-drug targets	2018	10.2174/1871530317666171114114321	2	1	a	a	b	1_a_a_b
santangelo, c; vari, r; scazzocchio, b; de sanctis, p; giovannini, c; d'archivio, m; masella, r	anti-inflammatory activity of extra virgin olive oil polyphenols: which role in the prevention and treatment of immune-mediated inflammatory diseases?	endocrine metabolic & immune disorders-drug targets	2018	10.2174/1871530317666171114114321	2	1	a	a	NA	1_a_a_NA
santangelo, c; vari, r; scazzocchio, b; de sanctis, p; giovannini, c; d'archivio, m; masella, r	anti-inflammatory activity of extra virgin olive oil polyphenols: which role in the prevention and treatment of immune-mediated inflammatory diseases?	endocrine metabolic & immune disorders-drug targets	2018	10.2174/1871530317666171114114321	2	1	a	NA	NA	1_a_NA_NA
santangelo, c; vari, r; scazzocchio, b; de sanctis, p; giovannini, c; d'archivio, m; masella, r	anti-inflammatory activity of extra virgin olive oil polyphenols: which role in the prevention and treatment of immune-mediated inflammatory diseases?	endocrine metabolic & immune disorders-drug targets	2018	10.2174/1871530317666171114114321	2	1	NA	NA	NA	1_NA_NA_NA
hass, u; herpich, c; norman, k	anti-inflammatory diets and fatigue	nutrients	2019	10.3390/nu11102315	0	4	NA	NA	NA	4_NA_NA_NA
rajabi, a; parinejad, n; ahmadi, k; khorramizadeh, mr; raza, m	anti-inflammatory effects of serum isolated from animals on intermittent feeding in c6 glioma cell line	neuroscience letters	2011	10.1016/j.neulet.2010.09.068	0	1	b	b	NA	1_b_b_NA
rajabi, a; parinejad, n; ahmadi, k; khorramizadeh, mr; raza, m	anti-inflammatory effects of serum isolated from animals on intermittent feeding in c6 glioma cell line	neuroscience letters	2011	10.1016/j.neulet.2010.09.068	0	1	b	NA	NA	1_b_NA_NA
rajabi, a; parinejad, n; ahmadi, k; khorramizadeh, mr; raza, m	anti-inflammatory effects of serum isolated from animals on intermittent feeding in c6 glioma cell line	neuroscience letters	2011	10.1016/j.neulet.2010.09.068	0	1	NA	NA	NA	1_NA_NA_NA
riccio, p; rossano, r; larocca, m; trotta, v; mennella, i; vitaglione, p; ettorre, m; graverini, a; de santis, a; di monte, e; coniglio, mg	anti-inflammatory nutritional intervention in patients with relapsing-remitting and primary-progressive multiple sclerosis: a pilot study	experimental biology and medicine	2016	10.1177/1535370215618462	29	1	a	a	a	1_a_a_a
riccio, p; rossano, r; larocca, m; trotta, v; mennella, i; vitaglione, p; ettorre, m; graverini, a; de santis, a; di monte, e; coniglio, mg	anti-inflammatory nutritional intervention in patients with relapsing-remitting and primary-progressive multiple sclerosis: a pilot study	experimental biology and medicine	2016	10.1177/1535370215618462	29	1	a	a	NA	1_a_a_NA
riccio, p; rossano, r; larocca, m; trotta, v; mennella, i; vitaglione, p; ettorre, m; graverini, a; de santis, a; di monte, e; coniglio, mg	anti-inflammatory nutritional intervention in patients with relapsing-remitting and primary-progressive multiple sclerosis: a pilot study	experimental biology and medicine	2016	10.1177/1535370215618462	29	1	a	NA	NA	1_a_NA_NA
riccio, p; rossano, r; larocca, m; trotta, v; mennella, i; vitaglione, p; ettorre, m; graverini, a; de santis, a; di monte, e; coniglio, mg	anti-inflammatory nutritional intervention in patients with relapsing-remitting and primary-progressive multiple sclerosis: a pilot study	experimental biology and medicine	2016	10.1177/1535370215618462	29	1	NA	NA	NA	1_NA_NA_NA
moradbeygi, k; parviz, m; rezaeizadeh, h; zargaran, a; sahraian, ma; mehrabadi, s; nikbakhtzadeh, m; zahedi, e	anti-lingo-1 improved remyelination and neurobehavioral deficit in cuprizone-induced demyelination	iranian journal of basic medical sciences	2021	10.22038/ijbms.2021.53531.12043	0	2	a	NA	NA	2_a_NA_NA
moradbeygi, k; parviz, m; rezaeizadeh, h; zargaran, a; sahraian, ma; mehrabadi, s; nikbakhtzadeh, m; zahedi, e	anti-lingo-1 improved remyelination and neurobehavioral deficit in cuprizone-induced demyelination	iranian journal of basic medical sciences	2021	10.22038/ijbms.2021.53531.12043	0	2	NA	NA	NA	2_NA_NA_NA
hirata, t; kobayashi, t; wada, a; ueda, t; fujikawa, t; miyashita, h; ikeda, t; tsukamoto, s; nohara, t	anti-obesity compounds in green leaves of eucommia ulmoides	bioorganic & medicinal chemistry letters	2011	10.1016/j.bmcl.2011.01.060	0	NA	NA	NA	NA	NA_NA_NA_NA
gonzalez-gonzalez, l; perez-cortez, jg; flores-aldana, m; macias-morales, n; hernandez-giron, c	antioxidant use as dietary therapy in patients with multiple sclerosis	medwave	2015	10.5867/medwave.2015.01.6065	0	1	a	b	NA	1_a_b_NA
gonzalez-gonzalez, l; perez-cortez, jg; flores-aldana, m; macias-morales, n; hernandez-giron, c	antioxidant use as dietary therapy in patients with multiple sclerosis	medwave	2015	10.5867/medwave.2015.01.6065	0	1	a	NA	NA	1_a_NA_NA
gonzalez-gonzalez, l; perez-cortez, jg; flores-aldana, m; macias-morales, n; hernandez-giron, c	antioxidant use as dietary therapy in patients with multiple sclerosis	medwave	2015	10.5867/medwave.2015.01.6065	0	1	NA	NA	NA	1_NA_NA_NA
mustafa, s; pandit, l	approach to diagnosis and management of optic neuropathy	neurology india	2014	10.4103/0028-3886.149370	0	NA	NA	NA	NA	NA_NA_NA_NA
durlach, j; bac, p; durlach, v; durlach, a; bara, m; guiet-bara, a	are age-related neurodegenerative diseases linked with various types of magnesium depletion?	magnesium research	1997	NA	1	1	a	b	NA	1_a_b_NA
durlach, j; bac, p; durlach, v; durlach, a; bara, m; guiet-bara, a	are age-related neurodegenerative diseases linked with various types of magnesium depletion?	magnesium research	1997	NA	1	1	a	NA	NA	1_a_NA_NA
durlach, j; bac, p; durlach, v; durlach, a; bara, m; guiet-bara, a	are age-related neurodegenerative diseases linked with various types of magnesium depletion?	magnesium research	1997	NA	1	1	NA	NA	NA	1_NA_NA_NA
safari, h; sarab, ga; naseri, m	artemisia dracunculus l. modulates the immune system in a multiple sclerosis mouse model	nutritional neuroscience	2021	10.1080/1028415x.2019.1681742	0	1	a	b	NA	1_a_b_NA
safari, h; sarab, ga; naseri, m	artemisia dracunculus l. modulates the immune system in a multiple sclerosis mouse model	nutritional neuroscience	2021	10.1080/1028415x.2019.1681742	0	1	a	NA	NA	1_a_NA_NA
safari, h; sarab, ga; naseri, m	artemisia dracunculus l. modulates the immune system in a multiple sclerosis mouse model	nutritional neuroscience	2021	10.1080/1028415x.2019.1681742	0	1	NA	NA	NA	1_NA_NA_NA
lambert, bl; butin, dn; moran, d; zhao, sz; carr, bc; chen, c; kizis, fj	arthritis care: comparison of physicians' and patients' views	seminars in arthritis and rheumatism	2000	10.1053/sarh.2000.9203	0	NA	NA	NA	NA	NA_NA_NA_NA
diomede, f; marconi, gd; serroni, m; pizzicannella, g; trubiani, o; pizzicannella, j	ascorbic acid enhances bone parameter expression in human gingival mesenchymal stem cells	journal of biological regulators and homeostatic agents	2019	10.23812/19-312-A	0	NA	NA	NA	NA	NA_NA_NA_NA
leussink, vi	aspects of nutrition for prevention and treatment of chronic neurological diseases	nervenarzt	2019	10.1007/s00115-019-0756-9	0	1	a	a	a	1_a_a_a
leussink, vi	aspects of nutrition for prevention and treatment of chronic neurological diseases	nervenarzt	2019	10.1007/s00115-019-0756-9	0	1	a	a	NA	1_a_a_NA
leussink, vi	aspects of nutrition for prevention and treatment of chronic neurological diseases	nervenarzt	2019	10.1007/s00115-019-0756-9	0	1	a	NA	NA	1_a_NA_NA
leussink, vi	aspects of nutrition for prevention and treatment of chronic neurological diseases	nervenarzt	2019	10.1007/s00115-019-0756-9	0	1	NA	NA	NA	1_NA_NA_NA
smalheiser, nr; swanson, dr	assessing a gap in the biomedical literature - magnesium-deficiency and neurologic disease	neuroscience research communications	1994	NA	0	NA	NA	NA	NA	NA_NA_NA_NA
nag, n; lin, x; yu, m; simpson-yap, s; jelinek, ga; neate, sl; levin, m	assessing lifestyle behaviours of people living with neurological conditions: a panoramic view of community dwelling australians from 2007-2018	journal of personalized medicine	2021	10.3390/jpm11020144	0	1	a	a	a	1_a_a_a
nag, n; lin, x; yu, m; simpson-yap, s; jelinek, ga; neate, sl; levin, m	assessing lifestyle behaviours of people living with neurological conditions: a panoramic view of community dwelling australians from 2007-2018	journal of personalized medicine	2021	10.3390/jpm11020144	0	1	a	a	NA	1_a_a_NA
nag, n; lin, x; yu, m; simpson-yap, s; jelinek, ga; neate, sl; levin, m	assessing lifestyle behaviours of people living with neurological conditions: a panoramic view of community dwelling australians from 2007-2018	journal of personalized medicine	2021	10.3390/jpm11020144	0	1	a	NA	NA	1_a_NA_NA
nag, n; lin, x; yu, m; simpson-yap, s; jelinek, ga; neate, sl; levin, m	assessing lifestyle behaviours of people living with neurological conditions: a panoramic view of community dwelling australians from 2007-2018	journal of personalized medicine	2021	10.3390/jpm11020144	0	1	NA	NA	NA	1_NA_NA_NA
barnes, ms; bonham, mp; robson, pj; strain, jj; lowe-strong, as; eaton-evans, j; ginty, f; wallace, jmw	assessment of 25-hydroxyvitamin d and 1,25-dihydroxyvitamin d-3 concentrations in male and female multiple sclerosis patients and control volunteers	multiple sclerosis	2007	10.1177/1352458506072666	4	1	c	a	NA	1_c_a_NA
barnes, ms; bonham, mp; robson, pj; strain, jj; lowe-strong, as; eaton-evans, j; ginty, f; wallace, jmw	assessment of 25-hydroxyvitamin d and 1,25-dihydroxyvitamin d-3 concentrations in male and female multiple sclerosis patients and control volunteers	multiple sclerosis	2007	10.1177/1352458506072666	4	1	c	NA	NA	1_c_NA_NA
barnes, ms; bonham, mp; robson, pj; strain, jj; lowe-strong, as; eaton-evans, j; ginty, f; wallace, jmw	assessment of 25-hydroxyvitamin d and 1,25-dihydroxyvitamin d-3 concentrations in male and female multiple sclerosis patients and control volunteers	multiple sclerosis	2007	10.1177/1352458506072666	4	1	NA	NA	NA	1_NA_NA_NA
moghaddasi, m; aghaei, m	assessment of bone densitometry in iranian patients with multiple sclerosis: a case-control study	iranian journal of neurology	2013	NA	0	NA	NA	NA	NA	NA_NA_NA_NA
forte, g; fadda, c; bocca, b; erre, gl; passiu, g; madeddu, r	association between exposure to heavy metals and systemic sclerosis: the levels of al, cd, hg, and pb in blood and urine of patients	biological trace element research	2019	10.1007/s12011-018-1509-5	0	NA	NA	NA	NA	NA_NA_NA_NA
zuniga, mg; dinkes, re; davalos-bichara, m; carey, jp; schubert, mc; king, wm; walston, j; agrawal, y	association between hearing loss and saccular dysfunction in older individuals	otology & neurotology	2012	10.1097/mao.0b013e31826bedbc	0	NA	NA	NA	NA	NA_NA_NA_NA
sharifi, mh; keshani, p; salehi, a; jaladat, am; mirzaei, z; nikseresht, a	association between multiple sclerosis and dietary patterns based on the traditional concept of food nature: a case-control study in iran	bmc neurology	2021	10.1186/s12883-021-02483-3	0	1	a	a	a	1_a_a_a
sharifi, mh; keshani, p; salehi, a; jaladat, am; mirzaei, z; nikseresht, a	association between multiple sclerosis and dietary patterns based on the traditional concept of food nature: a case-control study in iran	bmc neurology	2021	10.1186/s12883-021-02483-3	0	1	a	a	NA	1_a_a_NA
sharifi, mh; keshani, p; salehi, a; jaladat, am; mirzaei, z; nikseresht, a	association between multiple sclerosis and dietary patterns based on the traditional concept of food nature: a case-control study in iran	bmc neurology	2021	10.1186/s12883-021-02483-3	0	1	a	NA	NA	1_a_NA_NA
sharifi, mh; keshani, p; salehi, a; jaladat, am; mirzaei, z; nikseresht, a	association between multiple sclerosis and dietary patterns based on the traditional concept of food nature: a case-control study in iran	bmc neurology	2021	10.1186/s12883-021-02483-3	0	1	NA	NA	NA	1_NA_NA_NA
huang, xm; fan, y; han, xm; huang, zy; yu, mm; zhang, y; xu, qq; li, xz; wang, xr; lu, cc; xia, yk	association between serum vitamin levels and depression in us adults 20 years or older based on national health and nutrition examination survey 2005-2006	international journal of environmental research and public health	2018	10.3390/ijerph15061215	0	NA	NA	NA	NA	NA_NA_NA_NA
roberts, al; kubzansky, ld; malspeis, s; feldman, ch; costenbader, kh	association of depression with risk of incident systemic lupus erythematosus in women assessed across 2 decades	jama psychiatry	2018	10.1001/jamapsychiatry.2018.2462	0	NA	NA	NA	NA	NA_NA_NA_NA
rezapour-firouzi, s; arefhosseini, sr; farhoudi, m; ebrahimi-mamaghani, m; rashidi, mr; torbati, ma; baradaran, b	association of expanded disability status scale and cytokines after intervention with co-supplemented hemp seed, evening primrose oils and hot-natured diet in multiple sclerosis patients	bioimpacts	2013	10.5681/bi.2013.001	3	1	a	a	b	1_a_a_b
rezapour-firouzi, s; arefhosseini, sr; farhoudi, m; ebrahimi-mamaghani, m; rashidi, mr; torbati, ma; baradaran, b	association of expanded disability status scale and cytokines after intervention with co-supplemented hemp seed, evening primrose oils and hot-natured diet in multiple sclerosis patients	bioimpacts	2013	10.5681/bi.2013.001	3	1	a	a	NA	1_a_a_NA
rezapour-firouzi, s; arefhosseini, sr; farhoudi, m; ebrahimi-mamaghani, m; rashidi, mr; torbati, ma; baradaran, b	association of expanded disability status scale and cytokines after intervention with co-supplemented hemp seed, evening primrose oils and hot-natured diet in multiple sclerosis patients	bioimpacts	2013	10.5681/bi.2013.001	3	1	a	NA	NA	1_a_NA_NA
rezapour-firouzi, s; arefhosseini, sr; farhoudi, m; ebrahimi-mamaghani, m; rashidi, mr; torbati, ma; baradaran, b	association of expanded disability status scale and cytokines after intervention with co-supplemented hemp seed, evening primrose oils and hot-natured diet in multiple sclerosis patients	bioimpacts	2013	10.5681/bi.2013.001	3	1	NA	NA	NA	1_NA_NA_NA
jelinek, ga; hadgkiss, ej; weiland, tj; pereira, ng; marck, ch; van der meer, dm	association of fish consumption and omega 3 supplementation with quality of life, disability and disease activity in an international cohort of people with multiple sclerosis	international journal of neuroscience	2013	10.3109/00207454.2013.803104	20	1	a	a	a	1_a_a_a
jelinek, ga; hadgkiss, ej; weiland, tj; pereira, ng; marck, ch; van der meer, dm	association of fish consumption and omega 3 supplementation with quality of life, disability and disease activity in an international cohort of people with multiple sclerosis	international journal of neuroscience	2013	10.3109/00207454.2013.803104	20	1	a	a	NA	1_a_a_NA
jelinek, ga; hadgkiss, ej; weiland, tj; pereira, ng; marck, ch; van der meer, dm	association of fish consumption and omega 3 supplementation with quality of life, disability and disease activity in an international cohort of people with multiple sclerosis	international journal of neuroscience	2013	10.3109/00207454.2013.803104	20	1	a	NA	NA	1_a_NA_NA
jelinek, ga; hadgkiss, ej; weiland, tj; pereira, ng; marck, ch; van der meer, dm	association of fish consumption and omega 3 supplementation with quality of life, disability and disease activity in an international cohort of people with multiple sclerosis	international journal of neuroscience	2013	10.3109/00207454.2013.803104	20	1	NA	NA	NA	1_NA_NA_NA
radlovic, n; ristic, d; brdar, r; janic, n; lekovic, z; janic, d; smoljanic, z; dokmanovic, l; jovanovic, m	association of hereditary elliptocytosis and gilbert's syndrome as the cause of biliary calculosis: case report	srpski arhiv za celokupno lekarstvo	2011	10.2298/sarh1106386r	0	NA	NA	NA	NA	NA_NA_NA_NA
asgharzadeh, m; jigheh, za; kafil, hs; farhoudi, m; oskouei, ds; khaki-khatibi, f; fadaee, m; vegari, a; asgharzadeh, v; najafi-ghalelou, n; poor, bm; rashedi, j	association of interlcukin-1 and inteleukin-1 receptor antagonist gene polymorphisms with multiple sclerosis in azeri population of iran	endocrine metabolic & immune disorders-drug targets	2020	10.2174/1871530320666200309142541	0	1	NA	NA	NA	1_NA_NA_NA
uludag, if; kulu, u; sener, u; zorlu, y; erdogan, ig	association of multiple sclerosis and celiac disease: case report	turkiye klinikleri tip bilimleri dergisi	2011	10.5336/medsci.2009-12658	0	3	NA	NA	NA	3_NA_NA_NA
mendez-gomez, jl; pelletier, a; rougier, mb; korobelnik, jf; schweitzer, c; delyfer, mn; catheline, g; monferme, s; dartigues, jf; delcourt, c; helmer, c	association of retinal nerve fiber layer thickness with brain alterations in the visual and limbic networks in elderly adults without dementia	jama network open	2018	10.1001/jamanetworkopen.2018.4406	0	NA	NA	NA	NA	NA_NA_NA_NA
nag, n; yu, mg; jelinek, ga; simpson-yap, s; neate, sl; schmidt, hk	associations between lifestyle behaviors and quality of life differ based on multiple sclerosis phenotype	journal of personalized medicine	2021	10.3390/jpm11111218	0	1	a	a	a	1_a_a_a
nag, n; yu, mg; jelinek, ga; simpson-yap, s; neate, sl; schmidt, hk	associations between lifestyle behaviors and quality of life differ based on multiple sclerosis phenotype	journal of personalized medicine	2021	10.3390/jpm11111218	0	1	a	a	NA	1_a_a_NA
nag, n; yu, mg; jelinek, ga; simpson-yap, s; neate, sl; schmidt, hk	associations between lifestyle behaviors and quality of life differ based on multiple sclerosis phenotype	journal of personalized medicine	2021	10.3390/jpm11111218	0	1	a	NA	NA	1_a_NA_NA
nag, n; yu, mg; jelinek, ga; simpson-yap, s; neate, sl; schmidt, hk	associations between lifestyle behaviors and quality of life differ based on multiple sclerosis phenotype	journal of personalized medicine	2021	10.3390/jpm11111218	0	1	NA	NA	NA	1_NA_NA_NA
jelinek, ga; de livera, am; marck, ch; brown, cr; neate, sl; taylor, kl; weiland, tj	associations of lifestyle, medication, and socio-demographic factors with disability in people with multiple sclerosis: an international cross-sectional study	plos one	2016	10.1371/journal.pone.0161701	10	1	a	a	NA	1_a_a_NA
jelinek, ga; de livera, am; marck, ch; brown, cr; neate, sl; taylor, kl; weiland, tj	associations of lifestyle, medication, and socio-demographic factors with disability in people with multiple sclerosis: an international cross-sectional study	plos one	2016	10.1371/journal.pone.0161701	10	1	a	NA	NA	1_a_NA_NA
jelinek, ga; de livera, am; marck, ch; brown, cr; neate, sl; taylor, kl; weiland, tj	associations of lifestyle, medication, and socio-demographic factors with disability in people with multiple sclerosis: an international cross-sectional study	plos one	2016	10.1371/journal.pone.0161701	10	1	NA	NA	NA	1_NA_NA_NA
feart, c; helmer, c; merle, b; herrmann, fr; annweiler, c; dartigues, jf; delcourt, c; samieri, c	associations of lower vitamin d concentrations with cognitive decline and long-term risk of dementia and alzheimer's disease in older adults	alzheimers & dementia	2017	10.1016/j.jalz.2017.03.003	1	1	a	a	a	1_a_a_a
feart, c; helmer, c; merle, b; herrmann, fr; annweiler, c; dartigues, jf; delcourt, c; samieri, c	associations of lower vitamin d concentrations with cognitive decline and long-term risk of dementia and alzheimer's disease in older adults	alzheimers & dementia	2017	10.1016/j.jalz.2017.03.003	1	1	a	a	NA	1_a_a_NA
feart, c; helmer, c; merle, b; herrmann, fr; annweiler, c; dartigues, jf; delcourt, c; samieri, c	associations of lower vitamin d concentrations with cognitive decline and long-term risk of dementia and alzheimer's disease in older adults	alzheimers & dementia	2017	10.1016/j.jalz.2017.03.003	1	1	a	NA	NA	1_a_NA_NA
feart, c; helmer, c; merle, b; herrmann, fr; annweiler, c; dartigues, jf; delcourt, c; samieri, c	associations of lower vitamin d concentrations with cognitive decline and long-term risk of dementia and alzheimer's disease in older adults	alzheimers & dementia	2017	10.1016/j.jalz.2017.03.003	1	1	NA	NA	NA	1_NA_NA_NA
anheim, m; degos, b; echaniz-laguna, a; fleury, m; grucker, m; tranchant, c	ataxia associated with gluten sensitivity, myth or reality?	revue neurologique	2006	10.1016/s0035-3787(06)75002-0	3	3	NA	NA	NA	3_NA_NA_NA
ferdinandusse, s; zomer, awm; komen, jc; van den brink, ce; thanos, m; hamers, fpt; wanders, rja; van der saag, pt; poll-the, bt; brites, p	ataxia with loss of purkinje cells in a mouse model for refsum disease	proceedings of the national academy of sciences of the united states of america	2008	10.1073/pnas.0806066105	0	NA	NA	NA	NA	NA_NA_NA_NA
patel, r; moore, s; crawford, dk; hannsun, g; sasidhar, mv; tan, k; molaie, d; tiwari-woodruff, sk	attenuation of corpus callosum axon myelination and remyelination in the absence of circulating sex hormones	brain pathology	2013	10.1111/bpa.12029	2	2	b	NA	NA	2_b_NA_NA
patel, r; moore, s; crawford, dk; hannsun, g; sasidhar, mv; tan, k; molaie, d; tiwari-woodruff, sk	attenuation of corpus callosum axon myelination and remyelination in the absence of circulating sex hormones	brain pathology	2013	10.1111/bpa.12029	2	2	NA	NA	NA	2_NA_NA_NA
cammer, w; zhang, h	atypical glial cells in demyelinated and hypomyelinated mouse brains	brain research	1999	10.1016/s0006-8993(99)01621-2	0	NA	NA	NA	NA	NA_NA_NA_NA
pioggia, g; tonacci, a; tartarisco, g; billeci, l; muratori, f; ruta, l; gangemi, s	autism and lack of d3 vitamin: a systematic review	research in autism spectrum disorders	2014	10.1016/j.rasd.2014.09.003	0	1	c	NA	NA	1_c_NA_NA
pioggia, g; tonacci, a; tartarisco, g; billeci, l; muratori, f; ruta, l; gangemi, s	autism and lack of d3 vitamin: a systematic review	research in autism spectrum disorders	2014	10.1016/j.rasd.2014.09.003	0	1	NA	NA	NA	1_NA_NA_NA
landgren, am; landgren, o; gridley, g; dores, gm; linet, ms; morton, lm	autoimmune disease and subsequent risk of developing alimentary tract cancers among 4.5 million us male veterans	cancer	2011	10.1002/cncr.25524	1	NA	NA	NA	NA	NA_NA_NA_NA
hodgkinson, vl; zhu, s; wang, yf; ladomersky, e; nickelson, k; weisman, ga; lee, jw; gitlin, jd; petris, mj	autonomous requirements of the menkes disease protein in the nervous system	american journal of physiology-cell physiology	2015	10.1152/ajpcell.00130.2015	0	NA	NA	NA	NA	NA_NA_NA_NA
keller, cw; lunemann, jd	autophagy and autophagy-related proteins in cns autoimmunity	frontiers in immunology	2017	10.3389/fimmu.2017.00165	0	NA	NA	NA	NA	NA_NA_NA_NA
cai, z; finnie, jw; blumbergs, pc	avian riboflavin deficiency: an acquired tomaculous neuropathy	veterinary pathology	2006	10.1354/vp.43-5-780	1	NA	NA	NA	NA	NA_NA_NA_NA
lee, cy; naguel, c; gyurech, d; duvoisin, n; schilling, j	awareness of vaccination status and its predictors among working people in switzerland	bmc public health	2003	10.1186/1471-2458-3-18	0	NA	NA	NA	NA	NA_NA_NA_NA
boskovic, a; stankovic, i	axonal and demyelinating polyneuropathy associated with celiac disease	indian pediatrics	2014	10.1007/s13312-014-0385-0	0	NA	NA	NA	NA	NA_NA_NA_NA
chen, b; roy, sg; mcmonigle, rj; keebaugh, a; mccracken, an; selwan, e; fransson, r; fallegger, d; huwiler, a; kleinman, mt; edinger, al; hanessian, s	azacyclic fty720 analogues that limit nutrient transporter expression but lack s1p receptor activity and negative chronotropic effects offer a novel and effective strategy to kill cancer cells in vivo	acs chemical biology	2016	10.1021/acschembio.5b00761	1	NA	NA	NA	NA	NA_NA_NA_NA
asakly, s; magen-rimon, r; ighbariya, a; marjih-shallufi, m; ben-pora, t; ravid, s; eran, a; gepstein, v; hanna, s; weiss, r	bariatric surgery-associated myelopathy	obesity facts	2021	10.1159/000515374	0	1	b	b	NA	1_b_b_NA
asakly, s; magen-rimon, r; ighbariya, a; marjih-shallufi, m; ben-pora, t; ravid, s; eran, a; gepstein, v; hanna, s; weiss, r	bariatric surgery-associated myelopathy	obesity facts	2021	10.1159/000515374	0	1	b	NA	NA	1_b_NA_NA
asakly, s; magen-rimon, r; ighbariya, a; marjih-shallufi, m; ben-pora, t; ravid, s; eran, a; gepstein, v; hanna, s; weiss, r	bariatric surgery-associated myelopathy	obesity facts	2021	10.1159/000515374	0	1	NA	NA	NA	1_NA_NA_NA
vieth, r; sidhom, g	basic aspects of vitamin d nutrition	osteoporosis: pathophysiology and clinical management, second edition	2010	10.1007/978-1-59745-459-9_12	0	1	c	b	NA	1_c_b_NA
vieth, r; sidhom, g	basic aspects of vitamin d nutrition	osteoporosis: pathophysiology and clinical management, second edition	2010	10.1007/978-1-59745-459-9_12	0	1	c	NA	NA	1_c_NA_NA
vieth, r; sidhom, g	basic aspects of vitamin d nutrition	osteoporosis: pathophysiology and clinical management, second edition	2010	10.1007/978-1-59745-459-9_12	0	1	NA	NA	NA	1_NA_NA_NA
xu, hy; yang, hj; zhang, yb; clough, r; browning, r; li, xm	behavioral and neurobiological changes in c57bl/6 mice exposed to cuprizone	behavioral neuroscience	2009	10.1037/a0014477	15	2	a	NA	NA	2_a_NA_NA
xu, hy; yang, hj; zhang, yb; clough, r; browning, r; li, xm	behavioral and neurobiological changes in c57bl/6 mice exposed to cuprizone	behavioral neuroscience	2009	10.1037/a0014477	15	2	NA	NA	NA	2_NA_NA_NA
franco-pons, n; torrente, m; colomina, mt; vilella, e	behavioral deficits in the cuprizone-induced murine model of demyelination/remyelination	toxicology letters	2007	10.1016/j.toxlet.2007.01.010	25	2	a	NA	NA	2_a_NA_NA
franco-pons, n; torrente, m; colomina, mt; vilella, e	behavioral deficits in the cuprizone-induced murine model of demyelination/remyelination	toxicology letters	2007	10.1016/j.toxlet.2007.01.010	25	2	NA	NA	NA	2_NA_NA_NA
serra-de-oliveira, n; boilesen, sn; carvalho, cpd; lesueur-maluf, l; zollner, rd; spadari, rc; medalha, cc; de castro, gm	behavioural changes observed in demyelination model shares similarities with white matter abnormalities in humans	behavioural brain research	2015	10.1016/j.bbr.2015.03.038	5	2	a	NA	NA	2_a_NA_NA
serra-de-oliveira, n; boilesen, sn; carvalho, cpd; lesueur-maluf, l; zollner, rd; spadari, rc; medalha, cc; de castro, gm	behavioural changes observed in demyelination model shares similarities with white matter abnormalities in humans	behavioural brain research	2015	10.1016/j.bbr.2015.03.038	5	2	NA	NA	NA	2_NA_NA_NA
shi, xh; chen, yh; nadeem, l; xu, gx	beneficial effect of tnf-alpha inhibition on diabetic peripheral neuropathy	journal of neuroinflammation	2013	10.1186/1742-2094-10-69	0	NA	NA	NA	NA	NA_NA_NA_NA
xin, jp; feinstein, dl; hejna, mj; lorens, sa; mcguire, so	beneficial effects of blueberries in experimental autoimmune encephalomyelitis	journal of agricultural and food chemistry	2012	10.1021/jf203611t	3	1	a	a	a	1_a_a_a
xin, jp; feinstein, dl; hejna, mj; lorens, sa; mcguire, so	beneficial effects of blueberries in experimental autoimmune encephalomyelitis	journal of agricultural and food chemistry	2012	10.1021/jf203611t	3	1	a	a	NA	1_a_a_NA
xin, jp; feinstein, dl; hejna, mj; lorens, sa; mcguire, so	beneficial effects of blueberries in experimental autoimmune encephalomyelitis	journal of agricultural and food chemistry	2012	10.1021/jf203611t	3	1	a	NA	NA	1_a_NA_NA
xin, jp; feinstein, dl; hejna, mj; lorens, sa; mcguire, so	beneficial effects of blueberries in experimental autoimmune encephalomyelitis	journal of agricultural and food chemistry	2012	10.1021/jf203611t	3	1	NA	NA	NA	1_NA_NA_NA
mastorodemos, v; nikolakaki, h; tzagournissakis, m; kotzamani, d; panou, t; spanaki, c; klados, g; maris, t; kontolaimaki, e; psaroudaki, k; chlouverakis, g; georgakakis, g; plaitakis, a	benign multiple sclerosis in crete	multiple sclerosis journal	2010	10.1177/1352458510364631	0	NA	NA	NA	NA	NA_NA_NA_NA
leite, f; lima, m; marino, f; cosentino, m; ribeiro, l	beta(2) adrenoceptors are underexpressed in peripheral blood mononuclear cells and associated with a better metabolic profile in central obesity	international journal of medical sciences	2017	10.7150/ijms.19638	1	NA	NA	NA	NA	NA_NA_NA_NA
valerio, m; awad, ab	beta-sitosterol down-regulates some pro-inflammatory signal transduction pathways by increasing the activity of tyrosine phosphatase shp-1 in j774a.1 murine macrophages	international immunopharmacology	2011	10.1016/j.intimp.2011.02.018	0	NA	NA	NA	NA	NA_NA_NA_NA
cady, n; peterson, sr; freedman, sn; mangalam, ak	beyond metabolism: the complex interplay between dietary phytoestrogens, gut bacteria, and cells of nervous and immune systems	frontiers in neurology	2020	10.3389/fneur.2020.00150	1	1	b	a	NA	1_b_a_NA
cady, n; peterson, sr; freedman, sn; mangalam, ak	beyond metabolism: the complex interplay between dietary phytoestrogens, gut bacteria, and cells of nervous and immune systems	frontiers in neurology	2020	10.3389/fneur.2020.00150	1	1	b	NA	NA	1_b_NA_NA
cady, n; peterson, sr; freedman, sn; mangalam, ak	beyond metabolism: the complex interplay between dietary phytoestrogens, gut bacteria, and cells of nervous and immune systems	frontiers in neurology	2020	10.3389/fneur.2020.00150	1	1	NA	NA	NA	1_NA_NA_NA
brandstadter, r; sand, ik; sumowski, jf	beyond rehabilitation: a prevention model of reserve and brain maintenance in multiple sclerosis	multiple sclerosis journal	2019	10.1177/1352458519856847	1	1	a	a	a	1_a_a_a
brandstadter, r; sand, ik; sumowski, jf	beyond rehabilitation: a prevention model of reserve and brain maintenance in multiple sclerosis	multiple sclerosis journal	2019	10.1177/1352458519856847	1	1	a	a	NA	1_a_a_NA
brandstadter, r; sand, ik; sumowski, jf	beyond rehabilitation: a prevention model of reserve and brain maintenance in multiple sclerosis	multiple sclerosis journal	2019	10.1177/1352458519856847	1	1	a	NA	NA	1_a_NA_NA
brandstadter, r; sand, ik; sumowski, jf	beyond rehabilitation: a prevention model of reserve and brain maintenance in multiple sclerosis	multiple sclerosis journal	2019	10.1177/1352458519856847	1	1	NA	NA	NA	1_NA_NA_NA
esquenazi, s	bilateral reversible corneal edema associated with amantadine use	journal of ocular pharmacology and therapeutics	2009	10.1089/jop.2009.0029	0	NA	NA	NA	NA	NA_NA_NA_NA
angeloni, c; malaguti, m; barbalace, mc; hrelia, s	bioactivity of olive oil phenols in neuroprotection	international journal of molecular sciences	2017	10.3390/ijms18112230	2	NA	NA	NA	NA	NA_NA_NA_NA
kemp, ja; keebaugh, a; edson, ja; chow, d; kleinman, mt; chew, yc; mccracken, an; edinger, al; kwon, yj	biocompatible chemotherapy for leukemia by acid-cleavable, pegylated fty720	bioconjugate chemistry	2020	10.1021/acs.bioconjchem.9b00822	0	NA	NA	NA	NA	NA_NA_NA_NA
templer, di	biological correlates of northern-southern italy differences in iq	intelligence	2012	10.1016/j.intell.2012.04.005	0	NA	NA	NA	NA	NA_NA_NA_NA
ferranti, ep; grossmann, r; starkweather, a; heitkemper, m	biological determinants of health: genes, microbes, and metabolism exemplars of nursing science	nursing outlook	2017	10.1016/j.outlook.2017.03.013	0	1	a	a	a	1_a_a_a
ferranti, ep; grossmann, r; starkweather, a; heitkemper, m	biological determinants of health: genes, microbes, and metabolism exemplars of nursing science	nursing outlook	2017	10.1016/j.outlook.2017.03.013	0	1	a	a	NA	1_a_a_NA
ferranti, ep; grossmann, r; starkweather, a; heitkemper, m	biological determinants of health: genes, microbes, and metabolism exemplars of nursing science	nursing outlook	2017	10.1016/j.outlook.2017.03.013	0	1	a	NA	NA	1_a_NA_NA
ferranti, ep; grossmann, r; starkweather, a; heitkemper, m	biological determinants of health: genes, microbes, and metabolism exemplars of nursing science	nursing outlook	2017	10.1016/j.outlook.2017.03.013	0	1	NA	NA	NA	1_NA_NA_NA
ubogu, ee	biology of the human blood-nerve barrier in health and disease	experimental neurology	2020	10.1016/j.expneurol.2020.113272	0	NA	NA	NA	NA	NA_NA_NA_NA
beales, dl	biome depletion in conjunction with evolutionary mismatches could play a role in the etiology of neurofibromatosis 1	medical hypotheses	2015	10.1016/j.mehy.2015.01.014	0	NA	NA	NA	NA	NA_NA_NA_NA
neamtu, mc; rusu, l; rusu, pf; marin, m; neamtu, om	biomechanical disorders of foot in multiple sclerosis	romanian journal of morphology and embryology	2012	NA	0	NA	NA	NA	NA	NA_NA_NA_NA
leon-del-rio, a	biotin in metabolism, gene expression, and human disease	journal of inherited metabolic disease	2019	10.1002/jimd.12073	0	1	NA	NA	NA	1_NA_NA_NA
mock, dm	biotin: from nutrition to therapeutics	journal of nutrition	2017	10.3945/jn.116.238956	1	1	NA	NA	NA	1_NA_NA_NA
pardridge, wm	blood-brain barrier biology and methodology	journal of neurovirology	1999	10.3109/13550289909021285	0	NA	NA	NA	NA	NA_NA_NA_NA
persidsky, y; ramirez, sh; haorah, j; kanmogne, gd	blood-brain barrier: structural components and function under physiologic and pathologic conditions	journal of neuroimmune pharmacology	2006	10.1007/s11481-006-9025-3	3	NA	NA	NA	NA	NA_NA_NA_NA
dardiotis, e; tsouris, z; aslanidou, p; aloizou, am; sokratous, m; provatas, a; siokas, v; deretzi, g; hadjigeorgiou, gm	body mass index in patients with multiple sclerosis: a meta-analysis	neurological research	2019	10.1080/01616412.2019.1622873	0	1	b	d	NA	1_b_d_NA
dardiotis, e; tsouris, z; aslanidou, p; aloizou, am; sokratous, m; provatas, a; siokas, v; deretzi, g; hadjigeorgiou, gm	body mass index in patients with multiple sclerosis: a meta-analysis	neurological research	2019	10.1080/01616412.2019.1622873	0	1	b	NA	NA	1_b_NA_NA
dardiotis, e; tsouris, z; aslanidou, p; aloizou, am; sokratous, m; provatas, a; siokas, v; deretzi, g; hadjigeorgiou, gm	body mass index in patients with multiple sclerosis: a meta-analysis	neurological research	2019	10.1080/01616412.2019.1622873	0	1	NA	NA	NA	1_NA_NA_NA
kwon, yn; im, sy; park, ys; ahn, sh; seo, j; kim, sb; yoon, ss; waters, p; choi, hj; kong, sh; sung, jj; sung-min, k; kyung, sp	bone health in neuromyelitis optica: bone mineral density and fractures	multiple sclerosis and related disorders	2020	10.1016/j.msard.2020.102080	0	NA	NA	NA	NA	NA_NA_NA_NA
reijerkerk, a; lakeman, kam; drexhage, jar; van het hof, b; van wijck, y; van der pol, sma; kooij, g; geerts, d; de vries, he	brain endothelial barrier passage by monocytes is controlled by the endothelin system	journal of neurochemistry	2012	10.1111/j.1471-4159.2011.07393.x	0	NA	NA	NA	NA	NA_NA_NA_NA
fung, yk; meade, ag; rack, ep; blotcky, aj	brain mercury in neurodegenerative disorders	journal of toxicology-clinical toxicology	1997	10.3109/15563659709001165	0	NA	NA	NA	NA	NA_NA_NA_NA
kieslich, m; errazuriz, g; posselt, hg; moeller-hartmann, w; zanella, f; boehles, h	brain white-matter lesions in celiac disease: a prospective study of 75 diet-treated patients	pediatrics	2001	10.1542/peds.108.2.e21	6	3	NA	NA	NA	3_NA_NA_NA
wang, cy; deneen, b; tzeng, sf	brca1/brca2-containing complex subunit 3 controls oligodendrocyte differentiation by dynamically regulating lysine 63-linked ubiquitination	glia	2019	10.1002/glia.23660	0	NA	NA	NA	NA	NA_NA_NA_NA
borba, vv; sharif, k; shoenfeld, y	breastfeeding and autoimmunity: programing health from the beginning	american journal of reproductive immunology	2018	10.1111/aji.12778	1	1	b	c	NA	1_b_c_NA
borba, vv; sharif, k; shoenfeld, y	breastfeeding and autoimmunity: programing health from the beginning	american journal of reproductive immunology	2018	10.1111/aji.12778	1	1	b	NA	NA	1_b_NA_NA
borba, vv; sharif, k; shoenfeld, y	breastfeeding and autoimmunity: programing health from the beginning	american journal of reproductive immunology	2018	10.1111/aji.12778	1	1	NA	NA	NA	1_NA_NA_NA
brown, ea; johansson, l; farrington, k; gallagher, h; sensky, t; gordon, f; da silva-gane, m; beckett, n; hickson, m	broadening options for long-term dialysis in the elderly (bolde): differences in quality of life on peritoneal dialysis compared to haemodialysis for older patients	nephrology dialysis transplantation	2010	10.1093/ndt/gfq212	0	NA	NA	NA	NA	NA_NA_NA_NA
pacheco, y; acosta-ampudia, y; monsalve, dm; chang, c; gershwin, me; anaya, jm	bystander activation and autoimmunity	journal of autoimmunity	2019	10.1016/j.jaut.2019.06.012	0	NA	NA	NA	NA	NA_NA_NA_NA
massa, j; o'reilly, ej; munger, kl; ascherio, a	caffeine and alcohol intakes have no association with risk of multiple sclerosis	multiple sclerosis journal	2013	10.1177/1352458512448108	15	1	a	a	a	1_a_a_a
massa, j; o'reilly, ej; munger, kl; ascherio, a	caffeine and alcohol intakes have no association with risk of multiple sclerosis	multiple sclerosis journal	2013	10.1177/1352458512448108	15	1	a	a	NA	1_a_a_NA
massa, j; o'reilly, ej; munger, kl; ascherio, a	caffeine and alcohol intakes have no association with risk of multiple sclerosis	multiple sclerosis journal	2013	10.1177/1352458512448108	15	1	a	NA	NA	1_a_NA_NA
massa, j; o'reilly, ej; munger, kl; ascherio, a	caffeine and alcohol intakes have no association with risk of multiple sclerosis	multiple sclerosis journal	2013	10.1177/1352458512448108	15	1	NA	NA	NA	1_NA_NA_NA
yasui, m; kihira, t; ota, k	calcium-concentration in brains from multiple-sclerosis patients	biological trace element research	1993	10.1007/bf02783959	0	NA	NA	NA	NA	NA_NA_NA_NA
naghshineh, h; hojjati, smm; khatir, aa; saadat, p; ahangar, aa	can environmental factors increase the risk of multiple sclerosis? a narrative review	biomedical research and therapy	2019	10.15419/bmrat.v6i12.579	0	1	b	a	NA	1_b_a_NA
naghshineh, h; hojjati, smm; khatir, aa; saadat, p; ahangar, aa	can environmental factors increase the risk of multiple sclerosis? a narrative review	biomedical research and therapy	2019	10.15419/bmrat.v6i12.579	0	1	b	NA	NA	1_b_NA_NA
naghshineh, h; hojjati, smm; khatir, aa; saadat, p; ahangar, aa	can environmental factors increase the risk of multiple sclerosis? a narrative review	biomedical research and therapy	2019	10.15419/bmrat.v6i12.579	0	1	NA	NA	NA	1_NA_NA_NA
lebrun, c; rocher, f	cancer risk in patients with multiple sclerosis: potential impact of disease-modifying drugs	cns drugs	2018	10.1007/s40263-018-0564-y	0	NA	NA	NA	NA	NA_NA_NA_NA
liang, ct; chueh, ll; brayton, c; pang, vf; wu, sc; huang, sw; liang, sc; yu, ck; lee, cc; liu, ch	canine distemper in taiwan from 2000-2009: co-infections and the use of rt-pcr and immunohistochemistry to detect tissue involvement in two groups of dogs	international journal of applied research in veterinary medicine	2011	NA	0	NA	NA	NA	NA	NA_NA_NA_NA
gardin, a; kucher, k; kiese, b; appel-dingemanse, s	cannabinoid receptor agonist 13, a novel cannabinoid agonist: first in human pharmacokinetics and safety	drug metabolism and disposition	2009	10.1124/dmd.108.024000	0	NA	NA	NA	NA	NA_NA_NA_NA
solbrig, mv; hermanowicz, n	cannabinoid rescue of striatal progenitor cells in chronic borna disease viral encephalitis in rats	journal of neurovirology	2008	10.1080/13550280802074521	0	NA	NA	NA	NA	NA_NA_NA_NA
russo, eb	cannabis therapeutics and the future of neurology	frontiers in integrative neuroscience	2018	10.3389/fnint.2018.00051	1	NA	NA	NA	NA	NA_NA_NA_NA
motte, j; ambrosius, b; gruter, t; bachir, h; sgodzai, m; pedreiturria, x; pitarokoili, k; gold, r	capsaicin-enriched diet ameliorates autoimmune neuritis in rats	journal of neuroinflammation	2018	10.1186/s12974-018-1165-x	1	1	b	a	NA	1_b_a_NA
motte, j; ambrosius, b; gruter, t; bachir, h; sgodzai, m; pedreiturria, x; pitarokoili, k; gold, r	capsaicin-enriched diet ameliorates autoimmune neuritis in rats	journal of neuroinflammation	2018	10.1186/s12974-018-1165-x	1	1	b	NA	NA	1_b_NA_NA
motte, j; ambrosius, b; gruter, t; bachir, h; sgodzai, m; pedreiturria, x; pitarokoili, k; gold, r	capsaicin-enriched diet ameliorates autoimmune neuritis in rats	journal of neuroinflammation	2018	10.1186/s12974-018-1165-x	1	1	NA	NA	NA	1_NA_NA_NA
albuquerque, ld; damasceno, nrt; maia, fn; de carvalho, bm; maia, csc; d'almeida, jac; de melo, mlp	cardiovascular risk estimated in individuals with multiple sclerosis: a case-control study	multiple sclerosis and related disorders	2021	10.1016/j.msard.2021.103133	0	NA	NA	NA	NA	NA_NA_NA_NA
schneider, j; kuny, s; beker, d; sauve, y; lemieux, h	cardiovascular sexual dimorphism in a diet-induced type 2 diabetes rodent model, the nile rat (arvicanthis niloticus)	plos one	2018	10.1371/journal.pone.0208987	0	NA	NA	NA	NA	NA_NA_NA_NA
spaas, j; van noten, p; keytsman, c; nieste, i; blancquaert, l; derave, w; eijnde, bo	carnosine and skeletal muscle dysfunction in a rodent multiple sclerosis model	amino acids	2021	10.1007/s00726-021-03086-5	0	NA	NA	NA	NA	NA_NA_NA_NA
kingwell, e; zhu, fy; evans, c; duggan, t; oger, j; tremlett, h	causes that contribute to the excess mortality risk in multiple sclerosis: a population-based study	neuroepidemiology	2020	10.1159/000504804	0	NA	NA	NA	NA	NA_NA_NA_NA
meehan, tf; deluca, hf	cd8(+) t cells are not necessary for 1 alpha,25-dihydroxy-vitamin d-3 to suppress experimental autoimmune encephalomyelitis in mice	proceedings of the national academy of sciences of the united states of america	2002	10.1073/pnas.082100699	3	1	c	b	NA	1_c_b_NA
meehan, tf; deluca, hf	cd8(+) t cells are not necessary for 1 alpha,25-dihydroxy-vitamin d-3 to suppress experimental autoimmune encephalomyelitis in mice	proceedings of the national academy of sciences of the united states of america	2002	10.1073/pnas.082100699	3	1	c	NA	NA	1_c_NA_NA
meehan, tf; deluca, hf	cd8(+) t cells are not necessary for 1 alpha,25-dihydroxy-vitamin d-3 to suppress experimental autoimmune encephalomyelitis in mice	proceedings of the national academy of sciences of the united states of america	2002	10.1073/pnas.082100699	3	1	NA	NA	NA	1_NA_NA_NA
hijaz, nm; bracken, jm; chandratre, sr	celiac crisis presenting with status epilepticus and encephalopathy	european journal of pediatrics	2014	10.1007/s00431-013-2097-1	0	NA	NA	NA	NA	NA_NA_NA_NA
djuric, z; kamenov, b; katic, v	celiac disease manifested by polyneuropathy and swollen ankles	world journal of gastroenterology	2007	10.3748/wjg.v13.i18.2636	0	NA	NA	NA	NA	NA_NA_NA_NA
pietzak, m	celiac disease, wheat allergy, and gluten sensitivity: when gluten free is not a fad	journal of parenteral and enteral nutrition	2012	10.1177/0148607111426276	2	3	NA	NA	NA	3_NA_NA_NA
nijland, pg; michailidou, i; witte, me; mizee, mr; van der pol, sma; van het hof, b; reijerkerk, a; pellerin, l; van der valk, p; de vries, he; van horssen, j	cellular distribution of glucose and monocarboxylate transporters in human brain white matter and multiple sclerosis lesions	glia	2014	10.1002/glia.22667	2	1	b	b	NA	1_b_b_NA
nijland, pg; michailidou, i; witte, me; mizee, mr; van der pol, sma; van het hof, b; reijerkerk, a; pellerin, l; van der valk, p; de vries, he; van horssen, j	cellular distribution of glucose and monocarboxylate transporters in human brain white matter and multiple sclerosis lesions	glia	2014	10.1002/glia.22667	2	1	b	NA	NA	1_b_NA_NA
nijland, pg; michailidou, i; witte, me; mizee, mr; van der pol, sma; van het hof, b; reijerkerk, a; pellerin, l; van der valk, p; de vries, he; van horssen, j	cellular distribution of glucose and monocarboxylate transporters in human brain white matter and multiple sclerosis lesions	glia	2014	10.1002/glia.22667	2	1	NA	NA	NA	1_NA_NA_NA
forcier, nj; mizisin, ap; rimmer, ma; powell, hc	cellular pathology of the nerve microenvironment in galactose intoxication	journal of neuropathology and experimental neurology	1991	10.1097/00005072-199105000-00006	2	NA	NA	NA	NA	NA_NA_NA_NA
raddatz, bb; sun, wh; brogden, g; sun, yy; kammeyer, p; kalkuhl, a; colbatzky, f; deschl, u; naim, hy; baumgartner, w; ulrich, r	central nervous system demyelination and remyelination is independent from systemic cholesterol level in theiler's murine encephalomyelitis	brain pathology	2016	10.1111/bpa.12266	0	2	NA	NA	NA	2_NA_NA_NA
leroy, s; gout, a; husson, b; de tournemire, r; tardieu, m	centropontine myelinolysis related to refeeding syndrome in an adolescent suffering from anorexia nervosa	neuropediatrics	2012	10.1055/s-0032-1307458	1	1	a	b	NA	1_a_b_NA
leroy, s; gout, a; husson, b; de tournemire, r; tardieu, m	centropontine myelinolysis related to refeeding syndrome in an adolescent suffering from anorexia nervosa	neuropediatrics	2012	10.1055/s-0032-1307458	1	1	a	NA	NA	1_a_NA_NA
leroy, s; gout, a; husson, b; de tournemire, r; tardieu, m	centropontine myelinolysis related to refeeding syndrome in an adolescent suffering from anorexia nervosa	neuropediatrics	2012	10.1055/s-0032-1307458	1	1	NA	NA	NA	1_NA_NA_NA
alexander-kaufman, k; harper, c; wilce, p; matsumoto, i	cerebellar vermis proteome of chronic alcoholic individuals	alcoholism-clinical and experimental research	2007	10.1111/j.1530-0277.2007.00437.x	0	NA	NA	NA	NA	NA_NA_NA_NA
jurevics, h; hostettler, j; muse, ed; sammond, dw; matsushima, gk; toews, ad; morell, p	cerebroside synthesis as a measure of the rate of remyelination following cuprizone-induced demyelination in brain	journal of neurochemistry	2001	10.1046/j.1471-4159.2001.00310.x	3	2	a	NA	NA	2_a_NA_NA
jurevics, h; hostettler, j; muse, ed; sammond, dw; matsushima, gk; toews, ad; morell, p	cerebroside synthesis as a measure of the rate of remyelination following cuprizone-induced demyelination in brain	journal of neurochemistry	2001	10.1046/j.1471-4159.2001.00310.x	3	2	NA	NA	NA	2_NA_NA_NA
anagnostouli, m; livaniou, e; nyalala, jo; evangelatos, g; zournas, c; ithakissios, ds; papageorgiou, c	cerebrospinal fluid levels of biotin in various neurological disorders	acta neurologica scandinavica	1999	10.1111/j.1600-0404.1999.tb07369.x	1	NA	NA	NA	NA	NA_NA_NA_NA
titcomb, tj; brooks, l; smith, kl; ten eyck, p; rubenstein, lm; wahls, tl; snetselaar, lg	change in micronutrient intake among people with relapsing-remitting multiple sclerosis adapting the swank and wahls diets: an analysis of weighed food records	nutrients	2021	10.3390/nu13103507	0	1	a	a	a	1_a_a_a
titcomb, tj; brooks, l; smith, kl; ten eyck, p; rubenstein, lm; wahls, tl; snetselaar, lg	change in micronutrient intake among people with relapsing-remitting multiple sclerosis adapting the swank and wahls diets: an analysis of weighed food records	nutrients	2021	10.3390/nu13103507	0	1	a	a	NA	1_a_a_NA
titcomb, tj; brooks, l; smith, kl; ten eyck, p; rubenstein, lm; wahls, tl; snetselaar, lg	change in micronutrient intake among people with relapsing-remitting multiple sclerosis adapting the swank and wahls diets: an analysis of weighed food records	nutrients	2021	10.3390/nu13103507	0	1	a	NA	NA	1_a_NA_NA
titcomb, tj; brooks, l; smith, kl; ten eyck, p; rubenstein, lm; wahls, tl; snetselaar, lg	change in micronutrient intake among people with relapsing-remitting multiple sclerosis adapting the swank and wahls diets: an analysis of weighed food records	nutrients	2021	10.3390/nu13103507	0	1	NA	NA	NA	1_NA_NA_NA
capasso, a; milano, w; cauli, o	changes in the peripheral endocannabinoid system as a risk factor for the development of eating disorders	endocrine metabolic & immune disorders-drug targets	2018	10.2174/1871530318666180213112406	0	1	b	c	NA	1_b_c_NA
capasso, a; milano, w; cauli, o	changes in the peripheral endocannabinoid system as a risk factor for the development of eating disorders	endocrine metabolic & immune disorders-drug targets	2018	10.2174/1871530318666180213112406	0	1	b	NA	NA	1_b_NA_NA
capasso, a; milano, w; cauli, o	changes in the peripheral endocannabinoid system as a risk factor for the development of eating disorders	endocrine metabolic & immune disorders-drug targets	2018	10.2174/1871530318666180213112406	0	1	NA	NA	NA	1_NA_NA_NA
maione, f; cappellano, g; bellan, m; raineri, d; chiocchetti, a	chicken-or-egg question: which came first, extracellular vesicles or autoimmune diseases?	journal of leukocyte biology	2020	10.1002/jlb.3mr0120-232r	0	NA	NA	NA	NA	NA_NA_NA_NA
ashwal, s; rust, r	child neurology in the 20th century	pediatric research	2003	10.1203/01.pdr.0000047655.66475.52	0	NA	NA	NA	NA	NA_NA_NA_NA
kimball, s; vieth, r; dosch, hm; bar-or, a; cheung, r; gagne, d; o'connor, p; d'souza, c; ursell, m; burton, jm	cholecalciferol plus calcium suppresses abnormal pbmc reactivity in patients with multiple sclerosis	journal of clinical endocrinology & metabolism	2011	10.1210/jc.2011-0325	4	1	c	b	NA	1_c_b_NA
kimball, s; vieth, r; dosch, hm; bar-or, a; cheung, r; gagne, d; o'connor, p; d'souza, c; ursell, m; burton, jm	cholecalciferol plus calcium suppresses abnormal pbmc reactivity in patients with multiple sclerosis	journal of clinical endocrinology & metabolism	2011	10.1210/jc.2011-0325	4	1	c	NA	NA	1_c_NA_NA
kimball, s; vieth, r; dosch, hm; bar-or, a; cheung, r; gagne, d; o'connor, p; d'souza, c; ursell, m; burton, jm	cholecalciferol plus calcium suppresses abnormal pbmc reactivity in patients with multiple sclerosis	journal of clinical endocrinology & metabolism	2011	10.1210/jc.2011-0325	4	1	NA	NA	NA	1_NA_NA_NA
piccio, l; stark, jl; cross, ah	chronic calorie restriction attenuates experimental autoimmune encephalomyelitis	journal of leukocyte biology	2008	10.1189/jlb.0208133	56	1	b	b	NA	1_b_b_NA
piccio, l; stark, jl; cross, ah	chronic calorie restriction attenuates experimental autoimmune encephalomyelitis	journal of leukocyte biology	2008	10.1189/jlb.0208133	56	1	b	NA	NA	1_b_NA_NA
piccio, l; stark, jl; cross, ah	chronic calorie restriction attenuates experimental autoimmune encephalomyelitis	journal of leukocyte biology	2008	10.1189/jlb.0208133	56	1	NA	NA	NA	1_NA_NA_NA
lindner, m; fokuhl, j; linsmeier, f; trebst, c; stangel, m	chronic toxic demyelination in the central nervous system leads to axonal damage despite remyelination	neuroscience letters	2009	10.1016/j.neulet.2009.02.004	5	2	a	NA	NA	2_a_NA_NA
lindner, m; fokuhl, j; linsmeier, f; trebst, c; stangel, m	chronic toxic demyelination in the central nervous system leads to axonal damage despite remyelination	neuroscience letters	2009	10.1016/j.neulet.2009.02.004	5	2	NA	NA	NA	2_NA_NA_NA
donahue, jm; sells, se; bolin, dc	classification of actinobacillus spp isolates from horses involved in mare reproductive loss syndrome	american journal of veterinary research	2006	10.2460/ajvr.67.8.1426	0	NA	NA	NA	NA	NA_NA_NA_NA
vargas, cr; barschak, ag; coelho, dm; furlanetto, v; de souza, cfm; karam, sm; jardim, l; wajner, m; giugliani, r	clinical and biochemical findings in 7 patients with x-linked adrenoleukodystrophy treated with lorenzo's oil	genetics and molecular biology	2000	10.1590/s1415-47572000000400001	0	NA	NA	NA	NA	NA_NA_NA_NA
pinto, wbvd; de souza, pvs; de albuquerque, mvc; dutra, la; pedroso, jl; barsottini, ogp	clinical and epidemiological profiles of non-traumatic myelopathies	arquivos de neuro-psiquiatria	2016	10.1590/0004-282x20160001	0	NA	NA	NA	NA	NA_NA_NA_NA
dokuchaeva, nn; boiko, an	clinical and epidemiological study of multiple sclerosis in volgograd city	zhurnal nevrologii i psikhiatrii imeni s s korsakova	2006	NA	0	1	a	b	NA	1_a_b_NA
dokuchaeva, nn; boiko, an	clinical and epidemiological study of multiple sclerosis in volgograd city	zhurnal nevrologii i psikhiatrii imeni s s korsakova	2006	NA	0	1	a	NA	NA	1_a_NA_NA
dokuchaeva, nn; boiko, an	clinical and epidemiological study of multiple sclerosis in volgograd city	zhurnal nevrologii i psikhiatrii imeni s s korsakova	2006	NA	0	1	NA	NA	NA	1_NA_NA_NA
gartner, j; braun, a; holzinger, a; roerig, p; lenard, hg; roscher, aa	clinical and genetic aspects of x-linked adrenoleukodystrophy	neuropediatrics	1998	10.1055/s-2007-973526	0	NA	NA	NA	NA	NA_NA_NA_NA
kouchaki, e; tamtaji, or; salami, m; bahmani, f; kakhaki, rd; akbari, e; tajabadi-ebrahimi, m; jafari, p; asemi, z	clinical and metabolic response to probiotic supplementation in patients with multiple sclerosis: a randomized, double-blind, placebo-controlled trial	clinical nutrition	2017	10.1016/j.clnu.2016.08.015	17	1	b	c	NA	1_b_c_NA
kouchaki, e; tamtaji, or; salami, m; bahmani, f; kakhaki, rd; akbari, e; tajabadi-ebrahimi, m; jafari, p; asemi, z	clinical and metabolic response to probiotic supplementation in patients with multiple sclerosis: a randomized, double-blind, placebo-controlled trial	clinical nutrition	2017	10.1016/j.clnu.2016.08.015	17	1	b	NA	NA	1_b_NA_NA
kouchaki, e; tamtaji, or; salami, m; bahmani, f; kakhaki, rd; akbari, e; tajabadi-ebrahimi, m; jafari, p; asemi, z	clinical and metabolic response to probiotic supplementation in patients with multiple sclerosis: a randomized, double-blind, placebo-controlled trial	clinical nutrition	2017	10.1016/j.clnu.2016.08.015	17	1	NA	NA	NA	1_NA_NA_NA
behbehani, r	clinical approach to optic neuropathies	clinical ophthalmology	2007	NA	0	NA	NA	NA	NA	NA_NA_NA_NA
hua, lh; hersh, cm; tian, f; mowry, em; fitzgerald, kc	clinical characteristics of a large multi-center cohort of people with multiple sclerosis over age 60	multiple sclerosis and related disorders	2021	10.1016/j.msard.2020.102637	0	NA	NA	NA	NA	NA_NA_NA_NA
gomez-viera, n; rodriguez-silva, h; perez-nellar, j; telleria-diaz, a; nassiff, a; marquez, m; caceres, m; rivero-arias, e	clinical characteristics of cuban epidemic neuropathy	revista de neurologia	1997	NA	0	NA	NA	NA	NA	NA_NA_NA_NA
mesejo, a; perez-sancho, e; moreno, e	clinical consequences of neuromuscular impairments in critically ill patients	nutricion hospitalaria	2006	NA	0	NA	NA	NA	NA	NA_NA_NA_NA
marmoy, or; viswanathan, s	clinical electrophysiology of the optic nerve and retinal ganglion cells	eye	2021	10.1038/s41433-021-01614-x	0	NA	NA	NA	NA	NA_NA_NA_NA
chen, ch; kularatna, g; stone, cd; gutierrez, am; dassopoulos, t	clinical experience of natalizumab in crohn's disease patients in a restricted distribution program	annals of gastroenterology	2013	NA	0	NA	NA	NA	NA	NA_NA_NA_NA
manso-calderon, r	clinical features and treatment in the spectrum of paroxysmal dyskinesias: an observational study in south-west castilla y leon, spain	neurology research international	2019	10.1155/2019/4191796	0	NA	NA	NA	NA	NA_NA_NA_NA
sorenson, ej; sima, aaf; blaivas, m; sawchuk, k; wald, jj	clinical features of perineuritis	muscle & nerve	1997	10.1002/(sici)1097-4598(199709)20:9<1153::aid-mus10>3.0.co;2-u	0	NA	NA	NA	NA	NA_NA_NA_NA
volta, u; de giorgio, r; petrolini, n; stanghellini, v; barbara, g; granito, a; de ponti, f; corinaldesi, r; bianchi, fb	clinical findings and anti-neuronal antibodies in coeliac disease with neurological disorders	scandinavian journal of gastroenterology	2002	10.1080/003655202761020542	1	3	NA	NA	NA	3_NA_NA_NA
kerrison, jb; newman, nj	clinical spectrum of leber's hereditary optic neuropathy	clinical neuroscience	1997	NA	0	NA	NA	NA	NA	NA_NA_NA_NA
weiland, tj; jelinek, ga; marck, ch; hadgkiss, ej; van der meer, dm; pereira, ng; taylor, kl	clinically significant fatigue: prevalence and associated factors in an international sample of adults with multiple sclerosis recruited via the internet	plos one	2015	10.1371/journal.pone.0115541	16	1	a	a	NA	1_a_a_NA
weiland, tj; jelinek, ga; marck, ch; hadgkiss, ej; van der meer, dm; pereira, ng; taylor, kl	clinically significant fatigue: prevalence and associated factors in an international sample of adults with multiple sclerosis recruited via the internet	plos one	2015	10.1371/journal.pone.0115541	16	1	a	NA	NA	1_a_NA_NA
weiland, tj; jelinek, ga; marck, ch; hadgkiss, ej; van der meer, dm; pereira, ng; taylor, kl	clinically significant fatigue: prevalence and associated factors in an international sample of adults with multiple sclerosis recruited via the internet	plos one	2015	10.1371/journal.pone.0115541	16	1	NA	NA	NA	1_NA_NA_NA
laden, bp; tang, yz; porter, td	cloning, heterologous expression, and enzymological characterization of human squalene monooxygenase	archives of biochemistry and biophysics	2000	10.1006/abbi.1999.1629	1	NA	NA	NA	NA	NA_NA_NA_NA
sharif, k; watad, a; bragazzi, nl; adawi, m; amital, h; shoenfeld, y	coffee and autoimmunity: more than a mere hot beverage!	autoimmunity reviews	2017	10.1016/j.autrev.2017.05.007	3	1	a	a	a	1_a_a_a
sharif, k; watad, a; bragazzi, nl; adawi, m; amital, h; shoenfeld, y	coffee and autoimmunity: more than a mere hot beverage!	autoimmunity reviews	2017	10.1016/j.autrev.2017.05.007	3	1	a	a	NA	1_a_a_NA
sharif, k; watad, a; bragazzi, nl; adawi, m; amital, h; shoenfeld, y	coffee and autoimmunity: more than a mere hot beverage!	autoimmunity reviews	2017	10.1016/j.autrev.2017.05.007	3	1	a	NA	NA	1_a_NA_NA
sharif, k; watad, a; bragazzi, nl; adawi, m; amital, h; shoenfeld, y	coffee and autoimmunity: more than a mere hot beverage!	autoimmunity reviews	2017	10.1016/j.autrev.2017.05.007	3	1	NA	NA	NA	1_NA_NA_NA
askari, s; fanelli, d; harvey, k	cognitive fatigue interventions for people with multiple sclerosis: a scoping review	multiple sclerosis and related disorders	2021	10.1016/j.msard.2021.103213	0	NA	NA	NA	NA	NA_NA_NA_NA
golan, d; gross, b; miller, a; klil-drori, s; lavi, i; shiller, m; honigman, s; almog, r; segol, o	cognitive function of patients with crohn's disease is associated with intestinal disease activity	inflammatory bowel diseases	2016	10.1097/mib.0000000000000594	0	NA	NA	NA	NA	NA_NA_NA_NA
asgharzade, s; talaei, a; farkhondeh, t; forouzanfar, f	combining growth factor and stem cell therapy for stroke rehabilitation, a review	current drug targets	2020	10.2174/1389450121666200107100747	0	NA	NA	NA	NA	NA_NA_NA_NA
lagman, rl; davis, mp; legrand, sb; walsh, d	common symptoms in advanced cancer	surgical clinics of north america	2005	10.1016/j.suc.2004.11.004	0	NA	NA	NA	NA	NA_NA_NA_NA
sattui, se; singh, ja; gaffo, al	comorbidities in patients with crystal diseases and hyperuricemia	rheumatic disease clinics of north america	2014	10.1016/j.rdc.2014.01.005	0	NA	NA	NA	NA	NA_NA_NA_NA
shahla, j; dariush, h; bijan, sm; majid, e; zahra, a; bahman, y	comparative immunomodulatory effects of jelly royal and 10-h2da on experimental autoimmune encephalomyelitis	gene reports	2021	10.1016/j.genrep.2021.101217	0	NA	NA	NA	NA	NA_NA_NA_NA
moody, lr; herbst, aj; yoo, hs; vanderloo, jp; aiken, jm	comparative prion disease gene expression profiling using the prion disease mimetic, cuprizone	prion	2009	10.4161/pri.3.2.9059	0	2	a	NA	NA	2_a_NA_NA
moody, lr; herbst, aj; yoo, hs; vanderloo, jp; aiken, jm	comparative prion disease gene expression profiling using the prion disease mimetic, cuprizone	prion	2009	10.4161/pri.3.2.9059	0	2	NA	NA	NA	2_NA_NA_NA
szczuko, m; kaczkan, m; drozd, a; maciejewska, d; palma, j; owczarzak, a; marczuk, n; rutkowski, p; malgorzewicz, s	comparison of fatty acid profiles in a group of female patients with chronic kidney diseases (ckd) and metabolic syndrome (mets)-similar trends of changes, different pathophysiology	international journal of molecular sciences	2019	10.3390/ijms20071719	0	NA	NA	NA	NA	NA_NA_NA_NA
ghazavi, y; bahadoran, z; nikfarjam, m; moghaddam, nb; mirmiran, p; heydari, mr	comparison of food intake in multiple sclerosis patients and healthy individuals: a hospital-based case-controlled study	iranian journal of child neurology	2019	NA	0	1	a	a	a	1_a_a_a
ghazavi, y; bahadoran, z; nikfarjam, m; moghaddam, nb; mirmiran, p; heydari, mr	comparison of food intake in multiple sclerosis patients and healthy individuals: a hospital-based case-controlled study	iranian journal of child neurology	2019	NA	0	1	a	a	NA	1_a_a_NA
ghazavi, y; bahadoran, z; nikfarjam, m; moghaddam, nb; mirmiran, p; heydari, mr	comparison of food intake in multiple sclerosis patients and healthy individuals: a hospital-based case-controlled study	iranian journal of child neurology	2019	NA	0	1	a	NA	NA	1_a_NA_NA
ghazavi, y; bahadoran, z; nikfarjam, m; moghaddam, nb; mirmiran, p; heydari, mr	comparison of food intake in multiple sclerosis patients and healthy individuals: a hospital-based case-controlled study	iranian journal of child neurology	2019	NA	0	1	NA	NA	NA	1_NA_NA_NA
murgiano, l; timperio, am; zolla, l; bongiorni, s; valentini, a; pariset, l	comparison of milk fat globule membrane (mfgm) proteins of chianina and holstein cattle breed milk samples through proteomics methods	nutrients	2009	10.3390/nu1020302	0	NA	NA	NA	NA	NA_NA_NA_NA
galluzzo, p; capri, fc; vecchioni, l; realmuto, s; scalisi, l; cottone, s; nuzzo, d; alduina, r	comparison of the intestinal microbiome of italian patients with multiple sclerosis and their household relatives	life-basel	2021	10.3390/life11070620	0	1	b	b	NA	1_b_b_NA
galluzzo, p; capri, fc; vecchioni, l; realmuto, s; scalisi, l; cottone, s; nuzzo, d; alduina, r	comparison of the intestinal microbiome of italian patients with multiple sclerosis and their household relatives	life-basel	2021	10.3390/life11070620	0	1	b	NA	NA	1_b_NA_NA
galluzzo, p; capri, fc; vecchioni, l; realmuto, s; scalisi, l; cottone, s; nuzzo, d; alduina, r	comparison of the intestinal microbiome of italian patients with multiple sclerosis and their household relatives	life-basel	2021	10.3390/life11070620	0	1	NA	NA	NA	1_NA_NA_NA
grant, wb; garland, cf; holick, mf	comparisons of estimated economic burdens due to insufficient solar ultraviolet irradiance and vitamin d and excess solar uv irradiance for the united states	photochemistry and photobiology	2005	10.1562/2005-01-24-ra-424	1	1	c	NA	NA	1_c_NA_NA
grant, wb; garland, cf; holick, mf	comparisons of estimated economic burdens due to insufficient solar ultraviolet irradiance and vitamin d and excess solar uv irradiance for the united states	photochemistry and photobiology	2005	10.1562/2005-01-24-ra-424	1	1	NA	NA	NA	1_NA_NA_NA
yadav, v; narayanaswami, p	complementary and alternative medical therapies in multiple sclerosis-the american academy of neurology guidelines: a commentary	clinical therapeutics	2014	10.1016/j.clinthera.2014.10.011	0	1	a	b	NA	1_a_b_NA
yadav, v; narayanaswami, p	complementary and alternative medical therapies in multiple sclerosis-the american academy of neurology guidelines: a commentary	clinical therapeutics	2014	10.1016/j.clinthera.2014.10.011	0	1	a	NA	NA	1_a_NA_NA
yadav, v; narayanaswami, p	complementary and alternative medical therapies in multiple sclerosis-the american academy of neurology guidelines: a commentary	clinical therapeutics	2014	10.1016/j.clinthera.2014.10.011	0	1	NA	NA	NA	1_NA_NA_NA
schwarz, s; knorr, c; geiger, h; flachenecker, p	complementary and alternative medicine for multiple sclerosis	multiple sclerosis journal	2008	10.1177/1352458508092808	21	1	a	b	NA	1_a_b_NA
schwarz, s; knorr, c; geiger, h; flachenecker, p	complementary and alternative medicine for multiple sclerosis	multiple sclerosis journal	2008	10.1177/1352458508092808	21	1	a	NA	NA	1_a_NA_NA
schwarz, s; knorr, c; geiger, h; flachenecker, p	complementary and alternative medicine for multiple sclerosis	multiple sclerosis journal	2008	10.1177/1352458508092808	21	1	NA	NA	NA	1_NA_NA_NA
yadav, v; shinto, l; bourdette, d	complementary and alternative medicine for the treatment of multiple sclerosis	expert review of clinical immunology	2010	10.1586/eci.10.12	22	1	a	b	NA	1_a_b_NA
yadav, v; shinto, l; bourdette, d	complementary and alternative medicine for the treatment of multiple sclerosis	expert review of clinical immunology	2010	10.1586/eci.10.12	22	1	a	NA	NA	1_a_NA_NA
yadav, v; shinto, l; bourdette, d	complementary and alternative medicine for the treatment of multiple sclerosis	expert review of clinical immunology	2010	10.1586/eci.10.12	22	1	NA	NA	NA	1_NA_NA_NA
shinto, l; calabrese, c; morris, c; sinsheimer, s; bourdette, d	complementary and alternative medicine in multiple sclerosis: survey of licensed naturopaths	journal of alternative and complementary medicine	2004	10.1089/acm.2004.10.891	9	1	a	b	NA	1_a_b_NA
shinto, l; calabrese, c; morris, c; sinsheimer, s; bourdette, d	complementary and alternative medicine in multiple sclerosis: survey of licensed naturopaths	journal of alternative and complementary medicine	2004	10.1089/acm.2004.10.891	9	1	a	NA	NA	1_a_NA_NA
shinto, l; calabrese, c; morris, c; sinsheimer, s; bourdette, d	complementary and alternative medicine in multiple sclerosis: survey of licensed naturopaths	journal of alternative and complementary medicine	2004	10.1089/acm.2004.10.891	9	1	NA	NA	NA	1_NA_NA_NA
masullo, l; papas, ma; cotugna, n; baker, s; mahoney, l; trabulsi, j	complementary and alternative medicine use and nutrient intake among individuals with multiple sclerosis in the united states	journal of community health	2015	10.1007/s10900-014-9913-z	20	1	a	a	a	1_a_a_a
masullo, l; papas, ma; cotugna, n; baker, s; mahoney, l; trabulsi, j	complementary and alternative medicine use and nutrient intake among individuals with multiple sclerosis in the united states	journal of community health	2015	10.1007/s10900-014-9913-z	20	1	a	a	NA	1_a_a_NA
masullo, l; papas, ma; cotugna, n; baker, s; mahoney, l; trabulsi, j	complementary and alternative medicine use and nutrient intake among individuals with multiple sclerosis in the united states	journal of community health	2015	10.1007/s10900-014-9913-z	20	1	a	NA	NA	1_a_NA_NA
masullo, l; papas, ma; cotugna, n; baker, s; mahoney, l; trabulsi, j	complementary and alternative medicine use and nutrient intake among individuals with multiple sclerosis in the united states	journal of community health	2015	10.1007/s10900-014-9913-z	20	1	NA	NA	NA	1_NA_NA_NA
yadav, v; bourdette, d	complementary and alternative medicine: is there a role in multiple sclerosis?	current neurology and neuroscience reports	2006	10.1007/s11910-006-0014-y	3	1	a	b	NA	1_a_b_NA
yadav, v; bourdette, d	complementary and alternative medicine: is there a role in multiple sclerosis?	current neurology and neuroscience reports	2006	10.1007/s11910-006-0014-y	3	1	a	NA	NA	1_a_NA_NA
yadav, v; bourdette, d	complementary and alternative medicine: is there a role in multiple sclerosis?	current neurology and neuroscience reports	2006	10.1007/s11910-006-0014-y	3	1	NA	NA	NA	1_NA_NA_NA
leong, em; semple, sj; angley, m; siebert, w; petkov, j; mckinnon, ra	complementary and alternative medicines and dietary interventions in multiple sclerosis: what is being used in south australia and why?	complementary therapies in medicine	2009	10.1016/j.ctim.2009.03.001	32	1	a	b	NA	1_a_b_NA
leong, em; semple, sj; angley, m; siebert, w; petkov, j; mckinnon, ra	complementary and alternative medicines and dietary interventions in multiple sclerosis: what is being used in south australia and why?	complementary therapies in medicine	2009	10.1016/j.ctim.2009.03.001	32	1	a	NA	NA	1_a_NA_NA
leong, em; semple, sj; angley, m; siebert, w; petkov, j; mckinnon, ra	complementary and alternative medicines and dietary interventions in multiple sclerosis: what is being used in south australia and why?	complementary therapies in medicine	2009	10.1016/j.ctim.2009.03.001	32	1	NA	NA	NA	1_NA_NA_NA
huntley, a; ernst, e	complementary and alternative therapies for treating multiple sclerosis symptoms: a systematic review	complementary therapies in medicine	2000	10.1054/ctim.2000.0366	4	1	a	b	NA	1_a_b_NA
huntley, a; ernst, e	complementary and alternative therapies for treating multiple sclerosis symptoms: a systematic review	complementary therapies in medicine	2000	10.1054/ctim.2000.0366	4	1	a	NA	NA	1_a_NA_NA
huntley, a; ernst, e	complementary and alternative therapies for treating multiple sclerosis symptoms: a systematic review	complementary therapies in medicine	2000	10.1054/ctim.2000.0366	4	1	NA	NA	NA	1_NA_NA_NA
schwarz, s; leweling, h; sagstetter, bu; meinck, hm	complementary and alternative therapies in multiple sclerosis	psychopharmakotherapie	2008	10.1177/1352458508092808	0	NA	NA	NA	NA	NA_NA_NA_NA
claflin, sb; van der mei, iaf; taylor, bv	complementary and alternative treatments of multiple sclerosis: a review of the evidence from 2001 to 2016	journal of neurology neurosurgery and psychiatry	2018	10.1136/jnnp-2016-314490	5	1	a	a	a	1_a_a_a
claflin, sb; van der mei, iaf; taylor, bv	complementary and alternative treatments of multiple sclerosis: a review of the evidence from 2001 to 2016	journal of neurology neurosurgery and psychiatry	2018	10.1136/jnnp-2016-314490	5	1	a	a	NA	1_a_a_NA
claflin, sb; van der mei, iaf; taylor, bv	complementary and alternative treatments of multiple sclerosis: a review of the evidence from 2001 to 2016	journal of neurology neurosurgery and psychiatry	2018	10.1136/jnnp-2016-314490	5	1	a	NA	NA	1_a_NA_NA
claflin, sb; van der mei, iaf; taylor, bv	complementary and alternative treatments of multiple sclerosis: a review of the evidence from 2001 to 2016	journal of neurology neurosurgery and psychiatry	2018	10.1136/jnnp-2016-314490	5	1	NA	NA	NA	1_NA_NA_NA
yilmaz, d; karapinar, b; balkan, c; ay, y; kavakli, k	complete clinical recovery of a central pontine and extrapontine myelinolysis delayed onset in a child with acute myeloblastic leukemia	minerva pediatrica	2011	NA	0	NA	NA	NA	NA	NA_NA_NA_NA
lupo, v; pascual-pascual, si; sancho, p; calpena, e; gutierrez-molina, m; mateo-martinez, g; espinos, c; arriola-pereda, g	complexity of the hereditary motor and sensory neuropathies: clinical and cellular characterization of the mpz p.d90e mutation	journal of child neurology	2015	10.1177/0883073815571049	0	NA	NA	NA	NA	NA_NA_NA_NA
karpinska, e; socha, k; soroczynska, j; kochanowicz, j; jakoniuk, m; mariak, z; borawska, mh	concentration of magnesium in the serum and the ability status of patients with relapsing-remitting multiple sclerosis	journal of elementology	2017	10.5601/jelem.2016.21.4.1156	0	1	a	b	NA	1_a_b_NA
karpinska, e; socha, k; soroczynska, j; kochanowicz, j; jakoniuk, m; mariak, z; borawska, mh	concentration of magnesium in the serum and the ability status of patients with relapsing-remitting multiple sclerosis	journal of elementology	2017	10.5601/jelem.2016.21.4.1156	0	1	a	NA	NA	1_a_NA_NA
karpinska, e; socha, k; soroczynska, j; kochanowicz, j; jakoniuk, m; mariak, z; borawska, mh	concentration of magnesium in the serum and the ability status of patients with relapsing-remitting multiple sclerosis	journal of elementology	2017	10.5601/jelem.2016.21.4.1156	0	1	NA	NA	NA	1_NA_NA_NA
xuan, yh; yan, g; peng, h; wu, rh; xu, hy	concurrent changes in h-1 mrs metabolites and antioxidant enzymes in the brain of c57bl/6 mouse short-termly exposed to cuprizone: possible implications for schizophrenia	neurochemistry international	2014	10.1016/j.neuint.2014.02.004	1	2	a	NA	NA	2_a_NA_NA
xuan, yh; yan, g; peng, h; wu, rh; xu, hy	concurrent changes in h-1 mrs metabolites and antioxidant enzymes in the brain of c57bl/6 mouse short-termly exposed to cuprizone: possible implications for schizophrenia	neurochemistry international	2014	10.1016/j.neuint.2014.02.004	1	2	NA	NA	NA	2_NA_NA_NA
dong, fx; liu, dj; jiang, fy; liu, yp; wu, xx; qu, xb; liu, j; chen, y; fan, hb; yao, rq	conditional deletion offoxg1alleviates demyelination and facilitates remyelinationviathe wnt signaling pathway in cuprizone-induced demyelinated mice	neuroscience bulletin	2021	10.1007/s12264-020-00583-7	0	2	a	NA	NA	2_a_NA_NA
dong, fx; liu, dj; jiang, fy; liu, yp; wu, xx; qu, xb; liu, j; chen, y; fan, hb; yao, rq	conditional deletion offoxg1alleviates demyelination and facilitates remyelinationviathe wnt signaling pathway in cuprizone-induced demyelinated mice	neuroscience bulletin	2021	10.1007/s12264-020-00583-7	0	2	NA	NA	NA	2_NA_NA_NA
fitzgerald, kc; sand, ik; senders, a; spain, r; giesser, b; sullivan, p; baer, dj; larocca, n; zackowski, k; mowry, em	conducting dietary intervention trials in people with multiple sclerosis: lessons learned and a path forward	multiple sclerosis and related disorders	2020	10.1016/j.msard.2019.101478	1	1	a	a	a	1_a_a_a
fitzgerald, kc; sand, ik; senders, a; spain, r; giesser, b; sullivan, p; baer, dj; larocca, n; zackowski, k; mowry, em	conducting dietary intervention trials in people with multiple sclerosis: lessons learned and a path forward	multiple sclerosis and related disorders	2020	10.1016/j.msard.2019.101478	1	1	a	a	NA	1_a_a_NA
fitzgerald, kc; sand, ik; senders, a; spain, r; giesser, b; sullivan, p; baer, dj; larocca, n; zackowski, k; mowry, em	conducting dietary intervention trials in people with multiple sclerosis: lessons learned and a path forward	multiple sclerosis and related disorders	2020	10.1016/j.msard.2019.101478	1	1	a	NA	NA	1_a_NA_NA
fitzgerald, kc; sand, ik; senders, a; spain, r; giesser, b; sullivan, p; baer, dj; larocca, n; zackowski, k; mowry, em	conducting dietary intervention trials in people with multiple sclerosis: lessons learned and a path forward	multiple sclerosis and related disorders	2020	10.1016/j.msard.2019.101478	1	1	NA	NA	NA	1_NA_NA_NA
kumar, n; sharma, n; mehan, s	connection between jak/stat and ppar gamma signaling during the progression of multiple sclerosis: insights into the modulation of t-cells and immune responses in the brain	current molecular pharmacology	2021	10.2174/1874467214666210301121432	0	1	a	a	a	1_a_a_a
kumar, n; sharma, n; mehan, s	connection between jak/stat and ppar gamma signaling during the progression of multiple sclerosis: insights into the modulation of t-cells and immune responses in the brain	current molecular pharmacology	2021	10.2174/1874467214666210301121432	0	1	a	a	NA	1_a_a_NA
kumar, n; sharma, n; mehan, s	connection between jak/stat and ppar gamma signaling during the progression of multiple sclerosis: insights into the modulation of t-cells and immune responses in the brain	current molecular pharmacology	2021	10.2174/1874467214666210301121432	0	1	a	NA	NA	1_a_NA_NA
kumar, n; sharma, n; mehan, s	connection between jak/stat and ppar gamma signaling during the progression of multiple sclerosis: insights into the modulation of t-cells and immune responses in the brain	current molecular pharmacology	2021	10.2174/1874467214666210301121432	0	1	NA	NA	NA	1_NA_NA_NA
basu, r; das sarma, j	connexin 43/47 channels are important for astrocyte/oligodendrocyte cross-talk in myelination and demyelination	journal of biosciences	2018	10.1007/s12038-018-9811-0	0	2	a	NA	NA	2_a_NA_NA
basu, r; das sarma, j	connexin 43/47 channels are important for astrocyte/oligodendrocyte cross-talk in myelination and demyelination	journal of biosciences	2018	10.1007/s12038-018-9811-0	0	2	NA	NA	NA	2_NA_NA_NA
giustina, a; adler, ra; binkley, n; bollerslev, j; bouillon, r; dawson-hughes, b; ebeling, pr; feldman, d; formenti, am; lazaretti-castro, m; marcocci, c; rizzoli, r; sempos, ct; bilezikian, jp	consensus statement from 2(nd) international conference on controversies in vitamin d	reviews in endocrine & metabolic disorders	2020	10.1007/s11154-019-09532-w	0	1	a	a	a	1_a_a_a
giustina, a; adler, ra; binkley, n; bollerslev, j; bouillon, r; dawson-hughes, b; ebeling, pr; feldman, d; formenti, am; lazaretti-castro, m; marcocci, c; rizzoli, r; sempos, ct; bilezikian, jp	consensus statement from 2(nd) international conference on controversies in vitamin d	reviews in endocrine & metabolic disorders	2020	10.1007/s11154-019-09532-w	0	1	a	a	NA	1_a_a_NA
giustina, a; adler, ra; binkley, n; bollerslev, j; bouillon, r; dawson-hughes, b; ebeling, pr; feldman, d; formenti, am; lazaretti-castro, m; marcocci, c; rizzoli, r; sempos, ct; bilezikian, jp	consensus statement from 2(nd) international conference on controversies in vitamin d	reviews in endocrine & metabolic disorders	2020	10.1007/s11154-019-09532-w	0	1	a	NA	NA	1_a_NA_NA
giustina, a; adler, ra; binkley, n; bollerslev, j; bouillon, r; dawson-hughes, b; ebeling, pr; feldman, d; formenti, am; lazaretti-castro, m; marcocci, c; rizzoli, r; sempos, ct; bilezikian, jp	consensus statement from 2(nd) international conference on controversies in vitamin d	reviews in endocrine & metabolic disorders	2020	10.1007/s11154-019-09532-w	0	1	NA	NA	NA	1_NA_NA_NA
rathnasamy, g; ling, ea; kaur, c	consequences of iron accumulation in microglia and its implications in neuropathological conditions	cns & neurological disorders-drug targets	2013	10.2174/18715273113126660169	0	NA	NA	NA	NA	NA_NA_NA_NA
palukuru, s; patil, ss; nagarathna, r; singh, a; nibedita, ks	content validity of an integrated yoga module for practice during remission in relapsing-remitting multiple sclerosis patients	annals of neurosciences	2021	10.1177/09727531211023754	0	1	NA	NA	NA	1_NA_NA_NA
azary, s; schreiner, t; graves, j; waldman, a; belman, a; guttman, bw; aaen, g; tillema, jm; mar, s; hart, j; ness, j; harris, y; krupp, l; gorman, m; benson, l; rodriguez, m; chitnis, t; rose, j; barcellos, lf; lotze, t; carmichael, sl; roalstad, s; casper, ct; waubant, e	contribution of dietary intake to relapse rate in early paediatric multiple sclerosis	journal of neurology neurosurgery and psychiatry	2018	10.1136/jnnp-2017-315936	18	1	a	a	a	1_a_a_a
azary, s; schreiner, t; graves, j; waldman, a; belman, a; guttman, bw; aaen, g; tillema, jm; mar, s; hart, j; ness, j; harris, y; krupp, l; gorman, m; benson, l; rodriguez, m; chitnis, t; rose, j; barcellos, lf; lotze, t; carmichael, sl; roalstad, s; casper, ct; waubant, e	contribution of dietary intake to relapse rate in early paediatric multiple sclerosis	journal of neurology neurosurgery and psychiatry	2018	10.1136/jnnp-2017-315936	18	1	a	a	NA	1_a_a_NA
azary, s; schreiner, t; graves, j; waldman, a; belman, a; guttman, bw; aaen, g; tillema, jm; mar, s; hart, j; ness, j; harris, y; krupp, l; gorman, m; benson, l; rodriguez, m; chitnis, t; rose, j; barcellos, lf; lotze, t; carmichael, sl; roalstad, s; casper, ct; waubant, e	contribution of dietary intake to relapse rate in early paediatric multiple sclerosis	journal of neurology neurosurgery and psychiatry	2018	10.1136/jnnp-2017-315936	18	1	a	NA	NA	1_a_NA_NA
azary, s; schreiner, t; graves, j; waldman, a; belman, a; guttman, bw; aaen, g; tillema, jm; mar, s; hart, j; ness, j; harris, y; krupp, l; gorman, m; benson, l; rodriguez, m; chitnis, t; rose, j; barcellos, lf; lotze, t; carmichael, sl; roalstad, s; casper, ct; waubant, e	contribution of dietary intake to relapse rate in early paediatric multiple sclerosis	journal of neurology neurosurgery and psychiatry	2018	10.1136/jnnp-2017-315936	18	1	NA	NA	NA	1_NA_NA_NA
wheeler, ma; rothhammer, v; quintana, fj	control of immune-mediated pathology via the aryl hydrocarbon receptor	journal of biological chemistry	2017	10.1074/jbc.r116.767723	0	1	b	a	NA	1_b_a_NA
wheeler, ma; rothhammer, v; quintana, fj	control of immune-mediated pathology via the aryl hydrocarbon receptor	journal of biological chemistry	2017	10.1074/jbc.r116.767723	0	1	b	NA	NA	1_b_NA_NA
wheeler, ma; rothhammer, v; quintana, fj	control of immune-mediated pathology via the aryl hydrocarbon receptor	journal of biological chemistry	2017	10.1074/jbc.r116.767723	0	1	NA	NA	NA	1_NA_NA_NA
field, as; samsonov, a; alexander, al; mossahebi, p; duncan, id	conventional and quantitative mri in a novel feline model of demyelination and endogenous remyelination	journal of magnetic resonance imaging	2019	10.1002/jmri.26300	0	2	b	NA	NA	2_b_NA_NA
field, as; samsonov, a; alexander, al; mossahebi, p; duncan, id	conventional and quantitative mri in a novel feline model of demyelination and endogenous remyelination	journal of magnetic resonance imaging	2019	10.1002/jmri.26300	0	2	NA	NA	NA	2_NA_NA_NA
balto, jm; ensari, i; hubbard, ea; khan, n; barnes, jl; motl, rw	co-occurring risk factors in multiple sclerosis	american journal of health behavior	2017	10.5993/ajhb.41.1.8	0	1	a	a	NA	1_a_a_NA
balto, jm; ensari, i; hubbard, ea; khan, n; barnes, jl; motl, rw	co-occurring risk factors in multiple sclerosis	american journal of health behavior	2017	10.5993/ajhb.41.1.8	0	1	a	NA	NA	1_a_NA_NA
balto, jm; ensari, i; hubbard, ea; khan, n; barnes, jl; motl, rw	co-occurring risk factors in multiple sclerosis	american journal of health behavior	2017	10.5993/ajhb.41.1.8	0	1	NA	NA	NA	1_NA_NA_NA
guedes, kmr; perecmanis, s; arruda, lf; mustafa, vd; de castro, mb	copper deficiency in swine: clinical-pathologic characterization	ciencia rural	2014	10.1590/0103-8478cr20130883	0	NA	NA	NA	NA	NA_NA_NA_NA
wendel, km; lee, jb; affeldt, bm; hamer, m; harahap-carrillo, is; pardo, ac; obenaus, a	corpus callosum vasculature predicts white matter microstructure abnormalities after pediatric mild traumatic brain injury	journal of neurotrauma	2019	10.1089/neu.2018.5670	0	NA	NA	NA	NA	NA_NA_NA_NA
plow, m; finlayson, m; cho, c	correlates of nutritional behavior in individuals with multiple sclerosis	disability and health journal	2012	10.1016/j.dhjo.2012.05.007	3	1	NA	NA	NA	1_NA_NA_NA
plow, ma; finlayson, m; gunzler, d; heinemann, aw	correlates of participation in meaningful activities among people with multiple sclerosis	journal of rehabilitation medicine	2015	10.2340/16501977-1948	1	1	NA	NA	NA	1_NA_NA_NA
malosse, d; perron, h; sasco, a; seigneurin, jm	correlation between milk and dairy product consumption and multiple-sclerosis prevalence - a worldwide study	neuroepidemiology	1992	10.1159/000110946	28	1	a	b	NA	1_a_b_NA
malosse, d; perron, h; sasco, a; seigneurin, jm	correlation between milk and dairy product consumption and multiple-sclerosis prevalence - a worldwide study	neuroepidemiology	1992	10.1159/000110946	28	1	a	NA	NA	1_a_NA_NA
malosse, d; perron, h; sasco, a; seigneurin, jm	correlation between milk and dairy product consumption and multiple-sclerosis prevalence - a worldwide study	neuroepidemiology	1992	10.1159/000110946	28	1	NA	NA	NA	1_NA_NA_NA
skripuletz, t; lindner, m; kotsiari, a; garde, n; fokuhl, j; linsmeier, f; trebst, c; stangel, m	cortical demyelination is prominent in the murine cuprizone model and is strain-dependent	american journal of pathology	2008	10.2353/ajpath.2008.070850	25	2	a	NA	NA	2_a_NA_NA
skripuletz, t; lindner, m; kotsiari, a; garde, n; fokuhl, j; linsmeier, f; trebst, c; stangel, m	cortical demyelination is prominent in the murine cuprizone model and is strain-dependent	american journal of pathology	2008	10.2353/ajpath.2008.070850	25	2	NA	NA	NA	2_NA_NA_NA
brodszky, v; beretzky, z; baji, p; rencz, f; pentek, m; rotar, a; tachkov, k; mayer, s; simon, j; niewada, m; hren, r; gulacsi, l	cost-of-illness studies in nine central and eastern european countries	european journal of health economics	2019	10.1007/s10198-019-01066-x	0	NA	NA	NA	NA	NA_NA_NA_NA
toussirot, e; bereau, m; vauchy, c; saas, p	could sodium chloride be an environmental trigger for immune-mediated diseases? an overview of the experimental and clinical evidence	frontiers in physiology	2018	10.3389/fphys.2018.00440	0	1	b	a	NA	1_b_a_NA
toussirot, e; bereau, m; vauchy, c; saas, p	could sodium chloride be an environmental trigger for immune-mediated diseases? an overview of the experimental and clinical evidence	frontiers in physiology	2018	10.3389/fphys.2018.00440	0	1	b	NA	NA	1_b_NA_NA
toussirot, e; bereau, m; vauchy, c; saas, p	could sodium chloride be an environmental trigger for immune-mediated diseases? an overview of the experimental and clinical evidence	frontiers in physiology	2018	10.3389/fphys.2018.00440	0	1	NA	NA	NA	1_NA_NA_NA
ashtari, f; jamshidi, f; shoormasti, rs; pourpak, z; akbari, m	cow's milk allergy in multiple sclerosis patients	journal of research in medical sciences	2013	NA	5	1	a	b	NA	1_a_b_NA
ashtari, f; jamshidi, f; shoormasti, rs; pourpak, z; akbari, m	cow's milk allergy in multiple sclerosis patients	journal of research in medical sciences	2013	NA	5	1	a	NA	NA	1_a_NA_NA
ashtari, f; jamshidi, f; shoormasti, rs; pourpak, z; akbari, m	cow's milk allergy in multiple sclerosis patients	journal of research in medical sciences	2013	NA	5	1	NA	NA	NA	1_NA_NA_NA
morkholt, as; trabjerg, ms; oklinski, mke; bolther, l; kroese, lj; pritchard, cej; huijbers, ij; nieland, jdv	cpt1a plays a key role in the development and treatment of multiple sclerosis and experimental autoimmune encephalomyelitis	scientific reports	2019	10.1038/s41598-019-49868-6	2	1	b	d	NA	1_b_d_NA
morkholt, as; trabjerg, ms; oklinski, mke; bolther, l; kroese, lj; pritchard, cej; huijbers, ij; nieland, jdv	cpt1a plays a key role in the development and treatment of multiple sclerosis and experimental autoimmune encephalomyelitis	scientific reports	2019	10.1038/s41598-019-49868-6	2	1	b	NA	NA	1_b_NA_NA
morkholt, as; trabjerg, ms; oklinski, mke; bolther, l; kroese, lj; pritchard, cej; huijbers, ij; nieland, jdv	cpt1a plays a key role in the development and treatment of multiple sclerosis and experimental autoimmune encephalomyelitis	scientific reports	2019	10.1038/s41598-019-49868-6	2	1	NA	NA	NA	1_NA_NA_NA
langley, mr; choi, ci; peclat, tr; guo, y; simon, wl; yoon, h; kleppe, l; lucchinetti, cf; chini, ccs; chini, en; scarisbrick, ia	critical role of astrocyte nad plus glycohydrolase in myelin injury and regeneration	journal of neuroscience	2021	10.1523/jneurosci.2264-20.2021	0	1	b	d	NA	1_b_d_NA
langley, mr; choi, ci; peclat, tr; guo, y; simon, wl; yoon, h; kleppe, l; lucchinetti, cf; chini, ccs; chini, en; scarisbrick, ia	critical role of astrocyte nad plus glycohydrolase in myelin injury and regeneration	journal of neuroscience	2021	10.1523/jneurosci.2264-20.2021	0	1	b	NA	NA	1_b_NA_NA
langley, mr; choi, ci; peclat, tr; guo, y; simon, wl; yoon, h; kleppe, l; lucchinetti, cf; chini, ccs; chini, en; scarisbrick, ia	critical role of astrocyte nad plus glycohydrolase in myelin injury and regeneration	journal of neuroscience	2021	10.1523/jneurosci.2264-20.2021	0	1	NA	NA	NA	1_NA_NA_NA
silbermann, e; senders, a; wooliscroft, l; rice, j; cameron, m; waslo, c; orban, a; chase, e; yadav, v; bourdette, d; spain, ri	cross-sectional survey of complementary and alternative medicine used in oregon and southwest washington to treat multiple sclerosis: a 17-year update	multiple sclerosis and related disorders	2020	10.1016/j.msard.2020.102041	0	1	a	a	a	1_a_a_a
silbermann, e; senders, a; wooliscroft, l; rice, j; cameron, m; waslo, c; orban, a; chase, e; yadav, v; bourdette, d; spain, ri	cross-sectional survey of complementary and alternative medicine used in oregon and southwest washington to treat multiple sclerosis: a 17-year update	multiple sclerosis and related disorders	2020	10.1016/j.msard.2020.102041	0	1	a	a	NA	1_a_a_NA
silbermann, e; senders, a; wooliscroft, l; rice, j; cameron, m; waslo, c; orban, a; chase, e; yadav, v; bourdette, d; spain, ri	cross-sectional survey of complementary and alternative medicine used in oregon and southwest washington to treat multiple sclerosis: a 17-year update	multiple sclerosis and related disorders	2020	10.1016/j.msard.2020.102041	0	1	a	NA	NA	1_a_NA_NA
silbermann, e; senders, a; wooliscroft, l; rice, j; cameron, m; waslo, c; orban, a; chase, e; yadav, v; bourdette, d; spain, ri	cross-sectional survey of complementary and alternative medicine used in oregon and southwest washington to treat multiple sclerosis: a 17-year update	multiple sclerosis and related disorders	2020	10.1016/j.msard.2020.102041	0	1	NA	NA	NA	1_NA_NA_NA
wang, zj; long, h; chang, c; zhao, m; lu, qj	crosstalk between metabolism and epigenetic modifications in autoimmune diseases: a comprehensive overview	cellular and molecular life sciences	2018	10.1007/s00018-018-2864-2	0	1	a	b	NA	1_a_b_NA
wang, zj; long, h; chang, c; zhao, m; lu, qj	crosstalk between metabolism and epigenetic modifications in autoimmune diseases: a comprehensive overview	cellular and molecular life sciences	2018	10.1007/s00018-018-2864-2	0	1	a	NA	NA	1_a_NA_NA
wang, zj; long, h; chang, c; zhao, m; lu, qj	crosstalk between metabolism and epigenetic modifications in autoimmune diseases: a comprehensive overview	cellular and molecular life sciences	2018	10.1007/s00018-018-2864-2	0	1	NA	NA	NA	1_NA_NA_NA
varga, e; pandur, e; abraham, h; horvath, a; acs, p; komoly, s; miseta, a; sipos, k	cuprizone administration alters the iron metabolism in the mouse model of multiple sclerosis	cellular and molecular neurobiology	2018	10.1007/s10571-018-0578-5	4	2	a	NA	NA	2_a_NA_NA
varga, e; pandur, e; abraham, h; horvath, a; acs, p; komoly, s; miseta, a; sipos, k	cuprizone administration alters the iron metabolism in the mouse model of multiple sclerosis	cellular and molecular neurobiology	2018	10.1007/s10571-018-0578-5	4	2	NA	NA	NA	2_NA_NA_NA
kim, w; hahn, kr; jung, hy; kwon, hj; nam, sm; kim, th; kim, jw; yoo, dy; kim, dw; choi, jh; yoon, ys; hwang, ik	cuprizone affects hypothermia-induced neuroprotection and enhanced neuroblast differentiation in the gerbil hippocampus after ischemia	cells	2020	10.3390/cells9061438	0	2	a	NA	NA	2_a_NA_NA
kim, w; hahn, kr; jung, hy; kwon, hj; nam, sm; kim, th; kim, jw; yoo, dy; kim, dw; choi, jh; yoon, ys; hwang, ik	cuprizone affects hypothermia-induced neuroprotection and enhanced neuroblast differentiation in the gerbil hippocampus after ischemia	cells	2020	10.3390/cells9061438	0	2	NA	NA	NA	2_NA_NA_NA
chen, zh; chen, jt; johnson, m; gossman, zc; hendrickson, m; sakaie, k; martinez-rubio, c; gale, jt; trapp, bd	cuprizone does not induce cns demyelination in nonhuman primates	annals of clinical and translational neurology	2015	10.1002/acn3.159	1	2	a	NA	NA	2_a_NA_NA
chen, zh; chen, jt; johnson, m; gossman, zc; hendrickson, m; sakaie, k; martinez-rubio, c; gale, jt; trapp, bd	cuprizone does not induce cns demyelination in nonhuman primates	annals of clinical and translational neurology	2015	10.1002/acn3.159	1	2	NA	NA	NA	2_NA_NA_NA
abakumova, to; kuz'kina, aa; zharova, mv; pozdeeva, da; gubskii, il; shepeleva, ii; antonova, om; nukolova, nv; kekelidze, zi; chekhonin, vp	cuprizone model as a tool for preclinical studies of the efficacy of multiple sclerosis diagnosis and therapy	bulletin of experimental biology and medicine	2015	10.1007/s10517-015-2903-z	4	2	a	NA	NA	2_a_NA_NA
abakumova, to; kuz'kina, aa; zharova, mv; pozdeeva, da; gubskii, il; shepeleva, ii; antonova, om; nukolova, nv; kekelidze, zi; chekhonin, vp	cuprizone model as a tool for preclinical studies of the efficacy of multiple sclerosis diagnosis and therapy	bulletin of experimental biology and medicine	2015	10.1007/s10517-015-2903-z	4	2	NA	NA	NA	2_NA_NA_NA
benetti, f; ventura, m; salmini, b; ceola, s; carbonera, d; mammi, s; zitolo, a; d'angelo, p; urso, e; maffia, m; salvato, b; spisni, e	cuprizone neurotoxicity, copper deficiency and neurodegeneration	neurotoxicology	2010	10.1016/j.neuro.2010.05.008	6	2	a	NA	NA	2_a_NA_NA
benetti, f; ventura, m; salmini, b; ceola, s; carbonera, d; mammi, s; zitolo, a; d'angelo, p; urso, e; maffia, m; salvato, b; spisni, e	cuprizone neurotoxicity, copper deficiency and neurodegeneration	neurotoxicology	2010	10.1016/j.neuro.2010.05.008	6	2	NA	NA	NA	2_NA_NA_NA
omotoso, go; olajide, oj; gbadamosi, it; adebayo, jo; enaibe, bu; akinola, ob; owoyele, bv	cuprizone toxicity and garcinia kola biflavonoid complex activity on hippocampal morphology and neurobehaviour	heliyon	2019	10.1016/j.heliyon.2019.e02102	2	2	a	NA	NA	2_a_NA_NA
omotoso, go; olajide, oj; gbadamosi, it; adebayo, jo; enaibe, bu; akinola, ob; owoyele, bv	cuprizone toxicity and garcinia kola biflavonoid complex activity on hippocampal morphology and neurobehaviour	heliyon	2019	10.1016/j.heliyon.2019.e02102	2	2	NA	NA	NA	2_NA_NA_NA
silvestroff, l; bartucci, s; soto, e; gallo, v; pasquini, j; franco, p	cuprizone-induced demyelination in cnp::gfp transgenic mice	journal of comparative neurology	2010	10.1002/cne.22330	3	2	a	NA	NA	2_a_NA_NA
silvestroff, l; bartucci, s; soto, e; gallo, v; pasquini, j; franco, p	cuprizone-induced demyelination in cnp::gfp transgenic mice	journal of comparative neurology	2010	10.1002/cne.22330	3	2	NA	NA	NA	2_NA_NA_NA
wang, hk; li, cr; wang, hz; mei, f; liu, z; shen, hy; xiao, l	cuprizone-induced demyelination in mice: age-related vulnerability and exploratory behavior deficit	neuroscience bulletin	2013	10.1007/s12264-013-1323-1	2	2	a	NA	NA	2_a_NA_NA
wang, hk; li, cr; wang, hz; mei, f; liu, z; shen, hy; xiao, l	cuprizone-induced demyelination in mice: age-related vulnerability and exploratory behavior deficit	neuroscience bulletin	2013	10.1007/s12264-013-1323-1	2	2	NA	NA	NA	2_NA_NA_NA
liu, ch; zhang, n; zhang, ry; jin, l; petridis, ak; loers, g; zheng, xx; wang, zp; siebert, hc	cuprizone-induced demyelination in mouse hippocampus is alleviated by ketogenic diet	journal of agricultural and food chemistry	2020	10.1021/acs.jafc.0c04604	2	2	a	NA	NA	2_a_NA_NA
liu, ch; zhang, n; zhang, ry; jin, l; petridis, ak; loers, g; zheng, xx; wang, zp; siebert, hc	cuprizone-induced demyelination in mouse hippocampus is alleviated by ketogenic diet	journal of agricultural and food chemistry	2020	10.1021/acs.jafc.0c04604	2	2	NA	NA	NA	2_NA_NA_NA
silvestroff, l; bartucci, s; pasquini, j; franco, p	cuprizone-induced demyelination in the rat cerebral cortex and thyroid hormone effects on cortical remyelination	experimental neurology	2012	10.1016/j.expneurol.2012.02.018	4	2	a	NA	NA	2_a_NA_NA
silvestroff, l; bartucci, s; pasquini, j; franco, p	cuprizone-induced demyelination in the rat cerebral cortex and thyroid hormone effects on cortical remyelination	experimental neurology	2012	10.1016/j.expneurol.2012.02.018	4	2	NA	NA	NA	2_NA_NA_NA
wellman, sm; guzman, k; stieger, kc; brink, le; sridhar, s; dubaniewicz, mt; li, lh; cambi, f; kozai, tdy	cuprizone-induced oligodendrocyte loss and demyelination impairs recording performance of chronically implanted neural interfaces	biomaterials	2020	10.1016/j.biomaterials.2020.119842	0	2	a	NA	NA	2_a_NA_NA
wellman, sm; guzman, k; stieger, kc; brink, le; sridhar, s; dubaniewicz, mt; li, lh; cambi, f; kozai, tdy	cuprizone-induced oligodendrocyte loss and demyelination impairs recording performance of chronically implanted neural interfaces	biomaterials	2020	10.1016/j.biomaterials.2020.119842	0	2	NA	NA	NA	2_NA_NA_NA
passali, m; josefsen, k; frederiksen, jl; antvorskov, jc	current evidence on the efficacy of gluten-free diets in multiple sclerosis, psoriasis, type 1 diabetes and autoimmune thyroid diseases	nutrients	2020	10.3390/nu12082316	0	3	NA	NA	NA	3_NA_NA_NA
van wanrooij, eja; de jager, sca; van es, t; de vos, p; birch, hl; owen, da; watson, rj; biessen, eal; chapman, ga; van berkel, tjc; kuiper, j	cxcr3 antagonist nbi-74330 attenuates atherosclerotic plaque formation in ldl receptor-deficient mice	arteriosclerosis thrombosis and vascular biology	2008	10.1161/atvbaha.107.147827	0	NA	NA	NA	NA	NA_NA_NA_NA
krauthausen, m; saxe, s; zimmermann, j; emrich, m; heneka, mt; muller, m	cxcr3 modulates glial accumulation and activation in cuprizone-induced demyelination of the central nervous system	journal of neuroinflammation	2014	10.1186/1742-2094-11-109	1	2	a	NA	NA	2_a_NA_NA
krauthausen, m; saxe, s; zimmermann, j; emrich, m; heneka, mt; muller, m	cxcr3 modulates glial accumulation and activation in cuprizone-induced demyelination of the central nervous system	journal of neuroinflammation	2014	10.1186/1742-2094-11-109	1	2	NA	NA	NA	2_NA_NA_NA
yamamoto, s; gotoh, m; kawamura, y; yamashina, k; yagishita, s; awaji, t; tanaka, m; maruyama, k; murakami-murofushi, k; yoshikawa, k	cyclic phosphatidic acid treatment suppress cuprizone-induced demyelination and motor dysfunction in mice	european journal of pharmacology	2014	10.1016/j.ejphar.2014.07.040	1	2	a	NA	NA	2_a_NA_NA
yamamoto, s; gotoh, m; kawamura, y; yamashina, k; yagishita, s; awaji, t; tanaka, m; maruyama, k; murakami-murofushi, k; yoshikawa, k	cyclic phosphatidic acid treatment suppress cuprizone-induced demyelination and motor dysfunction in mice	european journal of pharmacology	2014	10.1016/j.ejphar.2014.07.040	1	2	NA	NA	NA	2_NA_NA_NA
imler, tj; petro, tm	decreased severity of experimental autoimmune encephalomyelitis during resveratrol administration is associated with increased il-17(+)il-10(+) t cells, cd4(-) ifn-gamma(+) cells, and decreased macrophage il-6 expression	international immunopharmacology	2009	10.1016/j.intimp.2008.10.015	7	1	a	a	a	1_a_a_a
imler, tj; petro, tm	decreased severity of experimental autoimmune encephalomyelitis during resveratrol administration is associated with increased il-17(+)il-10(+) t cells, cd4(-) ifn-gamma(+) cells, and decreased macrophage il-6 expression	international immunopharmacology	2009	10.1016/j.intimp.2008.10.015	7	1	a	a	NA	1_a_a_NA
imler, tj; petro, tm	decreased severity of experimental autoimmune encephalomyelitis during resveratrol administration is associated with increased il-17(+)il-10(+) t cells, cd4(-) ifn-gamma(+) cells, and decreased macrophage il-6 expression	international immunopharmacology	2009	10.1016/j.intimp.2008.10.015	7	1	a	NA	NA	1_a_NA_NA
imler, tj; petro, tm	decreased severity of experimental autoimmune encephalomyelitis during resveratrol administration is associated with increased il-17(+)il-10(+) t cells, cd4(-) ifn-gamma(+) cells, and decreased macrophage il-6 expression	international immunopharmacology	2009	10.1016/j.intimp.2008.10.015	7	1	NA	NA	NA	1_NA_NA_NA
mcnamara, rk; schurdak, jd; asch, rh; peters, bd; lindquist, dm	deficits in docosahexaenoic acid accrual during adolescence reduce rat forebrain white matter microstructural integrity: an in vivo diffusion tensor imaging study	developmental neuroscience	2018	10.1159/000484554	0	1	a	NA	NA	1_a_NA_NA
mcnamara, rk; schurdak, jd; asch, rh; peters, bd; lindquist, dm	deficits in docosahexaenoic acid accrual during adolescence reduce rat forebrain white matter microstructural integrity: an in vivo diffusion tensor imaging study	developmental neuroscience	2018	10.1159/000484554	0	1	NA	NA	NA	1_NA_NA_NA
shapira, y; agmon-levin, n; shoenfeld, y	defining and analyzing geoepidemiology and human autoimmunity	journal of autoimmunity	2010	10.1016/j.jaut.2009.11.018	2	3	NA	NA	NA	3_NA_NA_NA
jackson, l; dong, gk; althomali, w; sayed, ma; eldahshan, w; baban, b; johnson, mh; filosa, j; fagan, sc; ergul, a	delayed administration of angiotensin ii type 2 receptor (at2r) agonist compound 21 prevents the development of post-stroke cognitive impairment in diabetes through the modulation of microglia polarization	translational stroke research	2020	10.1007/s12975-019-00752-5	0	NA	NA	NA	NA	NA_NA_NA_NA
mana, p; linares, d; fordham, s; staykova, m; willenborg, d	deleterious role of ifn gamma in a toxic model of central nervous system demyelination	american journal of pathology	2006	10.2353/ajpath.2006.050799	3	2	NA	NA	NA	2_NA_NA_NA
almsaddi, m; bertorini, te; seltzer, wk	demyelinating neuropathy in a patient with multiple sclerosis and genotypical hmsn-1	neuromuscular disorders	1998	10.1016/s0960-8966(98)00016-9	0	NA	NA	NA	NA	NA_NA_NA_NA
pellizoni, fp; leite, az; rodrigues, nd; ubaiz, mj; gonzaga, mi; takaoka, nnc; mariano, vs; omori, wp; pinheiro, dg; matheucci, e; gomes, e; oliveira, dlv	detection of dysbiosis and increased intestinal permeability in brazilian patients with relapsing-remitting multiple sclerosis	international journal of environmental research and public health	2021	10.3390/ijerph18094621	0	3	NA	NA	NA	3_NA_NA_NA
strober, l	determinants of unemployment in multiple sclerosis (ms): the role of disease, person-specific factors, and engagement in positive health-related behaviors	multiple sclerosis and related disorders	2020	10.1016/j.msard.2020.102487	0	1	a	a	a	1_a_a_a
strober, l	determinants of unemployment in multiple sclerosis (ms): the role of disease, person-specific factors, and engagement in positive health-related behaviors	multiple sclerosis and related disorders	2020	10.1016/j.msard.2020.102487	0	1	a	a	NA	1_a_a_NA
strober, l	determinants of unemployment in multiple sclerosis (ms): the role of disease, person-specific factors, and engagement in positive health-related behaviors	multiple sclerosis and related disorders	2020	10.1016/j.msard.2020.102487	0	1	a	NA	NA	1_a_NA_NA
strober, l	determinants of unemployment in multiple sclerosis (ms): the role of disease, person-specific factors, and engagement in positive health-related behaviors	multiple sclerosis and related disorders	2020	10.1016/j.msard.2020.102487	0	1	NA	NA	NA	1_NA_NA_NA
akbulut, g; orhan, g; gurkas, e; sanlier, n; gezmen-karadag, m; karadag, ys; yildiran, h; ak, f	determination of nutritional status via food frequency consumption (ffq) and serum proteins and anemia parameters in multiple sclerosis (ms) patients	gazi medical journal	2014	10.12996/gmj.2014.40	2	1	a	b	NA	1_a_b_NA
akbulut, g; orhan, g; gurkas, e; sanlier, n; gezmen-karadag, m; karadag, ys; yildiran, h; ak, f	determination of nutritional status via food frequency consumption (ffq) and serum proteins and anemia parameters in multiple sclerosis (ms) patients	gazi medical journal	2014	10.12996/gmj.2014.40	2	1	a	NA	NA	1_a_NA_NA
akbulut, g; orhan, g; gurkas, e; sanlier, n; gezmen-karadag, m; karadag, ys; yildiran, h; ak, f	determination of nutritional status via food frequency consumption (ffq) and serum proteins and anemia parameters in multiple sclerosis (ms) patients	gazi medical journal	2014	10.12996/gmj.2014.40	2	1	NA	NA	NA	1_NA_NA_NA
jelinek, ga	determining causation from observation studies:achallenge for modern neuroepidemiology	frontiers in neurology	2017	10.3389/fneur.2017.00265	0	1	a	a	a	1_a_a_a
jelinek, ga	determining causation from observation studies:achallenge for modern neuroepidemiology	frontiers in neurology	2017	10.3389/fneur.2017.00265	0	1	a	a	NA	1_a_a_NA
jelinek, ga	determining causation from observation studies:achallenge for modern neuroepidemiology	frontiers in neurology	2017	10.3389/fneur.2017.00265	0	1	a	NA	NA	1_a_NA_NA
jelinek, ga	determining causation from observation studies:achallenge for modern neuroepidemiology	frontiers in neurology	2017	10.3389/fneur.2017.00265	0	1	NA	NA	NA	1_NA_NA_NA
cekici, h; tek, na	determining energy requirement and evaluating energy expenditure in neurological diseases	nutritional neuroscience	2020	10.1080/1028415x.2018.1530180	0	NA	NA	NA	NA	NA_NA_NA_NA
bohm, i; kriegl, i; prasser, m; rabl, c; visontai, s; gabler, g	development of a standardized dietetic assessment for medical nutrition therapy in patients with neurological disorders using the icf-dietetics a systematic literature search and delphi survey	ernahrungs umschau	2021	10.4455/eu.2021.032	0	4	NA	NA	NA	4_NA_NA_NA
pagno, ch; souza, lf; flores, sh; de jong, ev	development of food thickener with aggregated nutritional value, for the management of dysphagia	ciencia rural	2014	10.1590/s0103-84782014000400023	0	NA	NA	NA	NA	NA_NA_NA_NA
gromisch, es; sloan, j; zemon, v; tyry, t; schairer, lc; snyder, s; foley, fw	development of the multiple sclerosis resiliency scale (msrs)	rehabilitation psychology	2018	10.1037/rep0000219	0	NA	NA	NA	NA	NA_NA_NA_NA
abe, h; saito, f; tanaka, t; mizukami, s; hasegawa-baba, y; imatanaka, n; akahori, y; yoshida, t; shibutani, m	developmental cuprizone exposure impairs oligodendrocyte lineages differentially in cortical and white matter tissues and suppresses glutamatergic neurogenesis signals and synaptic plasticity in the hippocampal dentate gyrus of rats	toxicology and applied pharmacology	2016	10.1016/j.taap.2015.11.006	1	2	a	NA	NA	2_a_NA_NA
abe, h; saito, f; tanaka, t; mizukami, s; hasegawa-baba, y; imatanaka, n; akahori, y; yoshida, t; shibutani, m	developmental cuprizone exposure impairs oligodendrocyte lineages differentially in cortical and white matter tissues and suppresses glutamatergic neurogenesis signals and synaptic plasticity in the hippocampal dentate gyrus of rats	toxicology and applied pharmacology	2016	10.1016/j.taap.2015.11.006	1	2	NA	NA	NA	2_NA_NA_NA
abe, h; tanaka, t; kimura, m; mizukami, s; imatanaka, n; akahori, y; yoshida, t; shibutani, m	developmental exposure to cuprizone reduces intermediate-stage progenitor cells and cholinergic signals in the hippocampal neurogenesis in rat offspring	toxicology letters	2015	10.1016/j.toxlet.2015.01.022	2	2	a	NA	NA	2_a_NA_NA
abe, h; tanaka, t; kimura, m; mizukami, s; imatanaka, n; akahori, y; yoshida, t; shibutani, m	developmental exposure to cuprizone reduces intermediate-stage progenitor cells and cholinergic signals in the hippocampal neurogenesis in rat offspring	toxicology letters	2015	10.1016/j.toxlet.2015.01.022	2	2	NA	NA	NA	2_NA_NA_NA
almeras, l; eyles, d; benech, p; laffite, d; villard, c; patatian, a; boucraut, j; mackay-sim, a; mcgrath, j; feron, f	developmental vitamin d deficiency alters brain protein expression in the adult rat: implications for neuropsychiatric disorders	proteomics	2007	10.1002/pmic.200600392	7	1	c	a	NA	1_c_a_NA
almeras, l; eyles, d; benech, p; laffite, d; villard, c; patatian, a; boucraut, j; mackay-sim, a; mcgrath, j; feron, f	developmental vitamin d deficiency alters brain protein expression in the adult rat: implications for neuropsychiatric disorders	proteomics	2007	10.1002/pmic.200600392	7	1	c	NA	NA	1_c_NA_NA
almeras, l; eyles, d; benech, p; laffite, d; villard, c; patatian, a; boucraut, j; mackay-sim, a; mcgrath, j; feron, f	developmental vitamin d deficiency alters brain protein expression in the adult rat: implications for neuropsychiatric disorders	proteomics	2007	10.1002/pmic.200600392	7	1	NA	NA	NA	1_NA_NA_NA
de abreu, daf; nivet, e; baril, n; khrestchatisky, m; roman, f; feron, f	developmental vitamin d deficiency alters learning in c57bl/6j mice	behavioural brain research	2010	10.1016/j.bbr.2010.01.005	1	1	c	a	NA	1_c_a_NA
de abreu, daf; nivet, e; baril, n; khrestchatisky, m; roman, f; feron, f	developmental vitamin d deficiency alters learning in c57bl/6j mice	behavioural brain research	2010	10.1016/j.bbr.2010.01.005	1	1	c	NA	NA	1_c_NA_NA
de abreu, daf; nivet, e; baril, n; khrestchatisky, m; roman, f; feron, f	developmental vitamin d deficiency alters learning in c57bl/6j mice	behavioural brain research	2010	10.1016/j.bbr.2010.01.005	1	1	NA	NA	NA	1_NA_NA_NA
eyles, d; almeras, l; benech, p; patatian, a; mackay-sim, a; mcgrath, j; feron, f	developmental vitamin d deficiency alters the expression of genes encoding mitochondrial, cytoskeletal and synaptic proteins in the adult rat brain	journal of steroid biochemistry and molecular biology	2007	10.1016/j.jsbmb.2006.12.096	10	1	c	a	NA	1_c_a_NA
eyles, d; almeras, l; benech, p; patatian, a; mackay-sim, a; mcgrath, j; feron, f	developmental vitamin d deficiency alters the expression of genes encoding mitochondrial, cytoskeletal and synaptic proteins in the adult rat brain	journal of steroid biochemistry and molecular biology	2007	10.1016/j.jsbmb.2006.12.096	10	1	c	NA	NA	1_c_NA_NA
eyles, d; almeras, l; benech, p; patatian, a; mackay-sim, a; mcgrath, j; feron, f	developmental vitamin d deficiency alters the expression of genes encoding mitochondrial, cytoskeletal and synaptic proteins in the adult rat brain	journal of steroid biochemistry and molecular biology	2007	10.1016/j.jsbmb.2006.12.096	10	1	NA	NA	NA	1_NA_NA_NA
walcott, bp; coumans, jvce; kahle, kt	diagnostic pitfalls in spine surgery: masqueraders of surgical spine disease	neurosurgical focus	2011	10.3171/2011.7.focus11114	0	NA	NA	NA	NA	NA_NA_NA_NA
agranoff, bw; goldberg, d	diet and geographical distribution of multiple-sclerosis	lancet	1974	10.1016/s0140-6736(74)92163-1	38	1	a	b	NA	1_a_b_NA
agranoff, bw; goldberg, d	diet and geographical distribution of multiple-sclerosis	lancet	1974	10.1016/s0140-6736(74)92163-1	38	1	a	NA	NA	1_a_NA_NA
agranoff, bw; goldberg, d	diet and geographical distribution of multiple-sclerosis	lancet	1974	10.1016/s0140-6736(74)92163-1.	38	1	NA	NA	NA	1_NA_NA_NA
pozuelo-moyano, b; benito-leon, j	diet and multiple sclerosis	revista de neurologia	2014	10.33588/rn.5810.2013538	4	1	a	a	a	1_a_a_a
pozuelo-moyano, b; benito-leon, j	diet and multiple sclerosis	revista de neurologia	2014	10.33588/rn.5810.2013538	4	1	a	a	NA	1_a_a_NA
lauer, k	diet and multiple sclerosis	neurology	1997	10.1212/wnl.49.2_suppl_2.s55	27	1	a	b	NA	1_a_b_NA
schwarz, s; leweling, h	diet and multiple sclerosis	nervenarzt	2005	10.1007/s00115-004-1783-7	3	1	a	b	NA	1_a_b_NA
lauer, k	diet and multiple sclerosis	neurology	1997	10.1212/wnl.49.2_suppl_2.s55	27	1	a	NA	NA	1_a_NA_NA
pozuelo-moyano, b; benito-leon, j	diet and multiple sclerosis	revista de neurologia	2014	10.33588/rn.5810.2013538	4	1	a	NA	NA	1_a_NA_NA
schwarz, s; leweling, h	diet and multiple sclerosis	nervenarzt	2005	10.1007/s00115-004-1783-7	3	1	a	NA	NA	1_a_NA_NA
lauer, k	diet and multiple sclerosis	neurology	1997	10.1212/wnl.49.2_suppl_2.s55	27	1	NA	NA	NA	1_NA_NA_NA
pozuelo-moyano, b; benito-leon, j	diet and multiple sclerosis	revista de neurologia	2014	10.33588/rn.5810.2013538	4	1	NA	NA	NA	1_NA_NA_NA
schwarz, s; leweling, h	diet and multiple sclerosis	nervenarzt	2005	10.1007/s00115-004-1783-7	3	1	NA	NA	NA	1_NA_NA_NA
beckett, jm; bird, ml; pittaway, jk; ahuja, kdk	diet and multiple sclerosis: scoping review of web-based recommendations	interactive journal of medical research	2019	10.2196/10050	9	1	a	a	a	1_a_a_a
beckett, jm; bird, ml; pittaway, jk; ahuja, kdk	diet and multiple sclerosis: scoping review of web-based recommendations	interactive journal of medical research	2019	10.2196/10050	9	1	a	a	NA	1_a_a_NA
beckett, jm; bird, ml; pittaway, jk; ahuja, kdk	diet and multiple sclerosis: scoping review of web-based recommendations	interactive journal of medical research	2019	10.2196/10050	9	1	a	NA	NA	1_a_NA_NA
beckett, jm; bird, ml; pittaway, jk; ahuja, kdk	diet and multiple sclerosis: scoping review of web-based recommendations	interactive journal of medical research	2019	10.2196/10050	9	1	NA	NA	NA	1_NA_NA_NA
olson, wh	diet and multiple-sclerosis	postgraduate medicine	1976	10.1080/00325481.1976.11714369	0	1	a	b	NA	1_a_b_NA
olson, wh	diet and multiple-sclerosis	postgraduate medicine	1976	10.1080/00325481.1976.11714369	0	1	a	NA	NA	1_a_NA_NA
olson, wh	diet and multiple-sclerosis	postgraduate medicine	1976	10.1080/00325481.1976.11714369	0	1	NA	NA	NA	1_NA_NA_NA
manley, p	diet in multiple-sclerosis	practitioner	1994	NA	0	NA	NA	NA	NA	NA_NA_NA_NA
rotstein, dl; cortese, m; fung, tt; chitnis, t; ascherio, a; munger, kl	diet quality and risk of multiple sclerosis in two cohorts of us women	multiple sclerosis journal	2019	10.1177/1352458518807061	7	1	a	a	a	1_a_a_a
rotstein, dl; cortese, m; fung, tt; chitnis, t; ascherio, a; munger, kl	diet quality and risk of multiple sclerosis in two cohorts of us women	multiple sclerosis journal	2019	10.1177/1352458518807061	7	1	a	a	NA	1_a_a_NA
rotstein, dl; cortese, m; fung, tt; chitnis, t; ascherio, a; munger, kl	diet quality and risk of multiple sclerosis in two cohorts of us women	multiple sclerosis journal	2019	10.1177/1352458518807061	7	1	a	NA	NA	1_a_NA_NA
rotstein, dl; cortese, m; fung, tt; chitnis, t; ascherio, a; munger, kl	diet quality and risk of multiple sclerosis in two cohorts of us women	multiple sclerosis journal	2019	10.1177/1352458518807061	7	1	NA	NA	NA	1_NA_NA_NA
fitzgerald, kc; tyry, t; salter, a; cofield, ss; cutter, g; fox, r; marrie, ra	diet quality is associated with disability and symptom severity in multiple sclerosis	neurology	2018	10.1212/wnl.0000000000004768	26	1	a	a	a	1_a_a_a
fitzgerald, kc; tyry, t; salter, a; cofield, ss; cutter, g; fox, r; marrie, ra	diet quality is associated with disability and symptom severity in multiple sclerosis	neurology	2018	10.1212/wnl.0000000000004768	26	1	a	a	NA	1_a_a_NA
fitzgerald, kc; tyry, t; salter, a; cofield, ss; cutter, g; fox, r; marrie, ra	diet quality is associated with disability and symptom severity in multiple sclerosis	neurology	2018	10.1212/wnl.0000000000004768	26	1	a	NA	NA	1_a_NA_NA
fitzgerald, kc; tyry, t; salter, a; cofield, ss; cutter, g; fox, r; marrie, ra	diet quality is associated with disability and symptom severity in multiple sclerosis	neurology	2018	10.1212/wnl.0000000000004768	26	1	NA	NA	NA	1_NA_NA_NA
pommerich, um; nielsen, ro; overvad, k; dahm, cc; tjonneland, a; olsen, a; dalgas, u	diet quality is not associated with late-onset multiple sclerosis risk- a danish cohort study	multiple sclerosis and related disorders	2020	10.1016/j.msard.2020.101968	0	1	c	a	NA	1_c_a_NA
pommerich, um; nielsen, ro; overvad, k; dahm, cc; tjonneland, a; olsen, a; dalgas, u	diet quality is not associated with late-onset multiple sclerosis risk- a danish cohort study	multiple sclerosis and related disorders	2020	10.1016/j.msard.2020.101968	0	1	c	NA	NA	1_c_NA_NA
pommerich, um; nielsen, ro; overvad, k; dahm, cc; tjonneland, a; olsen, a; dalgas, u	diet quality is not associated with late-onset multiple sclerosis risk- a danish cohort study	multiple sclerosis and related disorders	2020	10.1016/j.msard.2020.101968	0	1	NA	NA	NA	1_NA_NA_NA
riccio, p; rossano, r	diet, gut microbiota, and vitamins d plus a in multiple sclerosis	neurotherapeutics	2018	10.1007/s13311-017-0581-4	14	1	a	a	a	1_a_a_a
riccio, p; rossano, r	diet, gut microbiota, and vitamins d plus a in multiple sclerosis	neurotherapeutics	2018	10.1007/s13311-017-0581-4	14	1	a	a	NA	1_a_a_NA
riccio, p; rossano, r	diet, gut microbiota, and vitamins d plus a in multiple sclerosis	neurotherapeutics	2018	10.1007/s13311-017-0581-4	14	1	a	NA	NA	1_a_NA_NA
riccio, p; rossano, r	diet, gut microbiota, and vitamins d plus a in multiple sclerosis	neurotherapeutics	2018	10.1007/s13311-017-0581-4	14	1	NA	NA	NA	1_NA_NA_NA
haghikia, a; linker, r	diet, microbiome and multiple sclerosis	aktuelle neurologie	2018	10.1055/s-0043-111789	0	1	b	a	NA	1_b_a_NA
haghikia, a; linker, r	diet, microbiome and multiple sclerosis	aktuelle neurologie	2018	10.1055/s-0043-111789	0	1	b	NA	NA	1_b_NA_NA
haghikia, a; linker, r	diet, microbiome and multiple sclerosis	aktuelle neurologie	2018	10.1055/s-0043-111789	0	1	NA	NA	NA	1_NA_NA_NA
vieira, sm; pagovich, oe; kriegel, ma	diet, microbiota and autoimmune diseases	lupus	2014	10.1177/0961203313501401	9	1	b	c	NA	1_b_c_NA
vieira, sm; pagovich, oe; kriegel, ma	diet, microbiota and autoimmune diseases	lupus	2014	10.1177/0961203313501401	9	1	b	NA	NA	1_b_NA_NA
vieira, sm; pagovich, oe; kriegel, ma	diet, microbiota and autoimmune diseases	lupus	2014	10.1177/0961203313501401	9	1	NA	NA	NA	1_NA_NA_NA
jakimovski, d; weinstock-guttman, b; gandhi, s; guan, y; hagemeier, j; ramasamy, dp; fuchs, ta; browne, rw; bergsland, n; dwyer, mg; ramanathan, m; zivadinov, r	dietary and lifestyle factors in multiple sclerosis progression: results from a 5-year longitudinal mri study	journal of neurology	2019	10.1007/s00415-019-09208-0	5	1	a	a	NA	1_a_a_NA
jakimovski, d; weinstock-guttman, b; gandhi, s; guan, y; hagemeier, j; ramasamy, dp; fuchs, ta; browne, rw; bergsland, n; dwyer, mg; ramanathan, m; zivadinov, r	dietary and lifestyle factors in multiple sclerosis progression: results from a 5-year longitudinal mri study	journal of neurology	2019	10.1007/s00415-019-09208-0	5	1	a	NA	NA	1_a_NA_NA
jakimovski, d; weinstock-guttman, b; gandhi, s; guan, y; hagemeier, j; ramasamy, dp; fuchs, ta; browne, rw; bergsland, n; dwyer, mg; ramanathan, m; zivadinov, r	dietary and lifestyle factors in multiple sclerosis progression: results from a 5-year longitudinal mri study	journal of neurology	2019	10.1007/s00415-019-09208-0	5	1	NA	NA	NA	1_NA_NA_NA
wahls, t; scott, mo; alshare, z; rubenstein, l; darling, w; carr, l; smith, k; chenard, ca; larocca, n; snetselaar, l	dietary approaches to treat ms-related fatigue: comparing the modified paleolithc (wahls elimination) and low saturated fat (swank) diets on perceived fatigue in persons with relapsing-remitting multiple sclerosis: study protocol for a randomized controlled trial	trials	2018	10.1186/s13063-018-2680-x	14	1	a	a	a	1_a_a_a
wahls, t; scott, mo; alshare, z; rubenstein, l; darling, w; carr, l; smith, k; chenard, ca; larocca, n; snetselaar, l	dietary approaches to treat ms-related fatigue: comparing the modified paleolithc (wahls elimination) and low saturated fat (swank) diets on perceived fatigue in persons with relapsing-remitting multiple sclerosis: study protocol for a randomized controlled trial	trials	2018	10.1186/s13063-018-2680-x	14	1	a	a	NA	1_a_a_NA
wahls, t; scott, mo; alshare, z; rubenstein, l; darling, w; carr, l; smith, k; chenard, ca; larocca, n; snetselaar, l	dietary approaches to treat ms-related fatigue: comparing the modified paleolithc (wahls elimination) and low saturated fat (swank) diets on perceived fatigue in persons with relapsing-remitting multiple sclerosis: study protocol for a randomized controlled trial	trials	2018	10.1186/s13063-018-2680-x	14	1	a	NA	NA	1_a_NA_NA
wahls, t; scott, mo; alshare, z; rubenstein, l; darling, w; carr, l; smith, k; chenard, ca; larocca, n; snetselaar, l	dietary approaches to treat ms-related fatigue: comparing the modified paleolithc (wahls elimination) and low saturated fat (swank) diets on perceived fatigue in persons with relapsing-remitting multiple sclerosis: study protocol for a randomized controlled trial	trials	2018	10.1186/s13063-018-2680-x	14	1	NA	NA	NA	1_NA_NA_NA
cantorna, mt; humpal-winter, j; deluca, hf	dietary calcium is a major factor in 1,25-dihydroxycholecalciferol suppression of experimental autoimmune encephalomyelitis in mice	journal of nutrition	1999	10.1093/jn/129.11.1966	18	1	c	b	NA	1_c_b_NA
cantorna, mt; humpal-winter, j; deluca, hf	dietary calcium is a major factor in 1,25-dihydroxycholecalciferol suppression of experimental autoimmune encephalomyelitis in mice	journal of nutrition	1999	10.1093/jn/129.11.1966	18	1	c	NA	NA	1_c_NA_NA
cantorna, mt; humpal-winter, j; deluca, hf	dietary calcium is a major factor in 1,25-dihydroxycholecalciferol suppression of experimental autoimmune encephalomyelitis in mice	journal of nutrition	1999	10.1093/jn/129.11.1966	18	1	NA	NA	NA	1_NA_NA_NA
hague, t; andrews, plr; barker, j; naughton, dp	dietary chelators as antioxidant enzyme mimetics: implications for dietary intervention in neurodegenerative diseases	behavioural pharmacology	2006	10.1097/00008877-200609000-00008	0	NA	NA	NA	NA	NA_NA_NA_NA
valentine, hl; amarnath, k; amarnath, v; valentine, wm	dietary copper enhances the peripheral myelinopathy produced by oral pyrrolidine dithiocarbamate	toxicological sciences	2006	10.1093/toxsci/kfj047	1	NA	NA	NA	NA	NA_NA_NA_NA
russell, rd; black, lj; begley, a	dietary education programs for adults with neurological diseases: a scoping review protocol	jbi evidence synthesis	2021	10.11124/jbisrir-d-19-00394	0	1	a	b	NA	1_a_b_NA
russell, rd; black, lj; begley, a	dietary education programs for adults with neurological diseases: a scoping review protocol	jbi evidence synthesis	2021	10.11124/jbisrir-d-19-00394	0	1	a	NA	NA	1_a_NA_NA
russell, rd; black, lj; begley, a	dietary education programs for adults with neurological diseases: a scoping review protocol	jbi evidence synthesis	2021	10.11124/jbisrir-d-19-00394	0	1	NA	NA	NA	1_NA_NA_NA
sand, ibk; fitzgerald, kc; gu, ya; brandstadter, r; riley, cs; buyukturkoglu, k; leavitt, vm; krieger, s; miller, a; lublin, f; klineova, s; fabian, m; sumowski, jf	dietary factors and mri metrics in early multiple sclerosis	multiple sclerosis and related disorders	2021	10.1016/j.msard.2021.103031	0	1	a	a	a	1_a_a_a
sand, ibk; fitzgerald, kc; gu, ya; brandstadter, r; riley, cs; buyukturkoglu, k; leavitt, vm; krieger, s; miller, a; lublin, f; klineova, s; fabian, m; sumowski, jf	dietary factors and mri metrics in early multiple sclerosis	multiple sclerosis and related disorders	2021	10.1016/j.msard.2021.103031	0	1	a	a	NA	1_a_a_NA
sand, ibk; fitzgerald, kc; gu, ya; brandstadter, r; riley, cs; buyukturkoglu, k; leavitt, vm; krieger, s; miller, a; lublin, f; klineova, s; fabian, m; sumowski, jf	dietary factors and mri metrics in early multiple sclerosis	multiple sclerosis and related disorders	2021	10.1016/j.msard.2021.103031	0	1	a	NA	NA	1_a_NA_NA
sand, ibk; fitzgerald, kc; gu, ya; brandstadter, r; riley, cs; buyukturkoglu, k; leavitt, vm; krieger, s; miller, a; lublin, f; klineova, s; fabian, m; sumowski, jf	dietary factors and mri metrics in early multiple sclerosis	multiple sclerosis and related disorders	2021	10.1016/j.msard.2021.103031	0	1	NA	NA	NA	1_NA_NA_NA
pakpoor, j; seminatore, b; graves, js; schreiner, t; waldman, at; lotze, te; belman, a; greenberg, bm; weinstock-guttman, b; aaen, g; tillema, jm; mcdonald, jc; hart, j; ness, jm; harris, y; rubin, j; candee, m; krupp, l; gorman, m; benson, l; rodriguez, m; chitnis, t; mar, s; kahn, i; rose, j; carmichael, sl; roalstad, s; waltz, m; casper, tc; waubant, e	dietary factors and pediatric multiple sclerosis: a case-control study	multiple sclerosis journal	2018	10.1177/1352458517713343	9	1	a	b	NA	1_a_b_NA
pakpoor, j; seminatore, b; graves, js; schreiner, t; waldman, at; lotze, te; belman, a; greenberg, bm; weinstock-guttman, b; aaen, g; tillema, jm; mcdonald, jc; hart, j; ness, jm; harris, y; rubin, j; candee, m; krupp, l; gorman, m; benson, l; rodriguez, m; chitnis, t; mar, s; kahn, i; rose, j; carmichael, sl; roalstad, s; waltz, m; casper, tc; waubant, e	dietary factors and pediatric multiple sclerosis: a case-control study	multiple sclerosis journal	2018	10.1177/1352458517713343	9	1	a	NA	NA	1_a_NA_NA
pakpoor, j; seminatore, b; graves, js; schreiner, t; waldman, at; lotze, te; belman, a; greenberg, bm; weinstock-guttman, b; aaen, g; tillema, jm; mcdonald, jc; hart, j; ness, jm; harris, y; rubin, j; candee, m; krupp, l; gorman, m; benson, l; rodriguez, m; chitnis, t; mar, s; kahn, i; rose, j; carmichael, sl; roalstad, s; waltz, m; casper, tc; waubant, e	dietary factors and pediatric multiple sclerosis: a case-control study	multiple sclerosis journal	2018	10.1177/1352458517713343	9	1	NA	NA	NA	1_NA_NA_NA
valburg, c; sonti, a; stern, jnh; najjar, s; harel, a	dietary factors in experimental autoimmune encephalomyelitis and multiple sclerosis: a comprehensive review	multiple sclerosis journal	2021	10.1177/1352458520923955	0	1	b	a	NA	1_b_a_NA
valburg, c; sonti, a; stern, jnh; najjar, s; harel, a	dietary factors in experimental autoimmune encephalomyelitis and multiple sclerosis: a comprehensive review	multiple sclerosis journal	2021	10.1177/1352458520923955	0	1	b	NA	NA	1_b_NA_NA
valburg, c; sonti, a; stern, jnh; najjar, s; harel, a	dietary factors in experimental autoimmune encephalomyelitis and multiple sclerosis: a comprehensive review	multiple sclerosis journal	2021	10.1177/1352458520923955	0	1	NA	NA	NA	1_NA_NA_NA
zhang, smm; willett, wc; hernan, ma; olek, mj; ascherio, a	dietary fat in relation to risk of multiple sclerosis among two large cohorts of women	american journal of epidemiology	2000	10.1093/aje/152.11.1056	48	1	a	a	a	1_a_a_a
zhang, smm; willett, wc; hernan, ma; olek, mj; ascherio, a	dietary fat in relation to risk of multiple sclerosis among two large cohorts of women	american journal of epidemiology	2000	10.1093/aje/152.11.1056	48	1	a	a	NA	1_a_a_NA
zhang, smm; willett, wc; hernan, ma; olek, mj; ascherio, a	dietary fat in relation to risk of multiple sclerosis among two large cohorts of women	american journal of epidemiology	2000	10.1093/aje/152.11.1056	48	1	a	NA	NA	1_a_NA_NA
zhang, smm; willett, wc; hernan, ma; olek, mj; ascherio, a	dietary fat in relation to risk of multiple sclerosis among two large cohorts of women	american journal of epidemiology	2000	10.1093/aje/152.11.1056	48	1	NA	NA	NA	1_NA_NA_NA
haase, s; haghikia, a; gold, r; linker, ra	dietary fatty acids and susceptibility to multiple sclerosis	multiple sclerosis journal	2018	10.1177/1352458517737372	4	1	b	a	NA	1_b_a_NA
haase, s; haghikia, a; gold, r; linker, ra	dietary fatty acids and susceptibility to multiple sclerosis	multiple sclerosis journal	2018	10.1177/1352458517737372	4	1	b	NA	NA	1_b_NA_NA
haase, s; haghikia, a; gold, r; linker, ra	dietary fatty acids and susceptibility to multiple sclerosis	multiple sclerosis journal	2018	10.1177/1352458517737372	4	1	NA	NA	NA	1_NA_NA_NA
cole, gm; ma, ql; frautschy, sa	dietary fatty acids and the aging brain	nutrition reviews	2010	10.1111/j.1753-4887.2010.00345.x	1	1	NA	NA	NA	1_NA_NA_NA
haghikia, a; jorg, s; duscha, a; berg, j; manzel, a; waschbisch, a; hammer, a; lee, dh; may, c; wilck, n; balogh, a; ostermann, ai; schebb, nh; akkad, da; grohme, da; kleinewietfeld, m; kempa, s; thone, j; demir, s; muller, dn; gold, r; linker, ra	dietary fatty acids directly impact central nervous system autoimmunity via the small intestine	immunity	2015	10.1016/j.immuni.2015.09.007	51	1	b	a	NA	1_b_a_NA
haghikia, a; jorg, s; duscha, a; berg, j; manzel, a; waschbisch, a; hammer, a; lee, dh; may, c; wilck, n; balogh, a; ostermann, ai; schebb, nh; akkad, da; grohme, da; kleinewietfeld, m; kempa, s; thone, j; demir, s; muller, dn; gold, r; linker, ra	dietary fatty acids directly impact central nervous system autoimmunity via the small intestine	immunity	2015	10.1016/j.immuni.2015.09.007	51	1	b	NA	NA	1_b_NA_NA
haghikia, a; jorg, s; duscha, a; berg, j; manzel, a; waschbisch, a; hammer, a; lee, dh; may, c; wilck, n; balogh, a; ostermann, ai; schebb, nh; akkad, da; grohme, da; kleinewietfeld, m; kempa, s; thone, j; demir, s; muller, dn; gold, r; linker, ra	dietary fatty acids directly impact central nervous system autoimmunity via the small intestine	immunity	2015	10.1016/j.immuni.2015.09.007	51	1	NA	NA	NA	1_NA_NA_NA
solfrizzi, v; frisardi, v; capurso, c; d'introno, a; colacicco, am; vendemiale, g; capurso, a; panza, f	dietary fatty acids, cognitive decline, and dementia	handbook of behavior, food and nutrition	2011	10.1007/978-0-387-92271-3_179	0	1	a	a	a	1_a_a_a
solfrizzi, v; frisardi, v; capurso, c; d'introno, a; colacicco, am; vendemiale, g; capurso, a; panza, f	dietary fatty acids, cognitive decline, and dementia	handbook of behavior, food and nutrition	2011	10.1007/978-0-387-92271-3_179	0	1	a	a	NA	1_a_a_NA
solfrizzi, v; frisardi, v; capurso, c; d'introno, a; colacicco, am; vendemiale, g; capurso, a; panza, f	dietary fatty acids, cognitive decline, and dementia	handbook of behavior, food and nutrition	2011	10.1007/978-0-387-92271-3_179	0	1	a	NA	NA	1_a_NA_NA
solfrizzi, v; frisardi, v; capurso, c; d'introno, a; colacicco, am; vendemiale, g; capurso, a; panza, f	dietary fatty acids, cognitive decline, and dementia	handbook of behavior, food and nutrition	2011	10.1007/978-0-387-92271-3_179	0	1	NA	NA	NA	1_NA_NA_NA
boles, dj; rizzo, wb	dietary fatty-acids temporarily alter liver very long-chain fatty-acid composition in mice	journal of nutrition	1992	10.1093/jn/122.8.1662	0	NA	NA	NA	NA	NA_NA_NA_NA
socha, k; kochanowicz, j; karpinska, e; soroczynska, j; jakoniuk, m; mariak, z; borawska, mh	dietary habits and selenium, glutathione peroxidase and total antioxidant status in the serum of patients with relapsing-remitting multiple sclerosis	nutrition journal	2014	10.1186/1475-2891-13-62	5	1	a	b	NA	1_a_b_NA
socha, k; kochanowicz, j; karpinska, e; soroczynska, j; jakoniuk, m; mariak, z; borawska, mh	dietary habits and selenium, glutathione peroxidase and total antioxidant status in the serum of patients with relapsing-remitting multiple sclerosis	nutrition journal	2014	10.1186/1475-2891-13-62	5	1	a	NA	NA	1_a_NA_NA
socha, k; kochanowicz, j; karpinska, e; soroczynska, j; jakoniuk, m; mariak, z; borawska, mh	dietary habits and selenium, glutathione peroxidase and total antioxidant status in the serum of patients with relapsing-remitting multiple sclerosis	nutrition journal	2014	10.1186/1475-2891-13-62	5	1	NA	NA	NA	1_NA_NA_NA
scrivo, r; perricone, c; altobelli, a; castellani, c; tinti, l; conti, f; valesini, g	dietary habits bursting into the complex pathogenesis of autoimmune diseases: the emerging role of salt from experimental and clinical studies	nutrients	2019	10.3390/nu11051013	0	1	b	a	NA	1_b_a_NA
scrivo, r; perricone, c; altobelli, a; castellani, c; tinti, l; conti, f; valesini, g	dietary habits bursting into the complex pathogenesis of autoimmune diseases: the emerging role of salt from experimental and clinical studies	nutrients	2019	10.3390/nu11051013	0	1	b	NA	NA	1_b_NA_NA
scrivo, r; perricone, c; altobelli, a; castellani, c; tinti, l; conti, f; valesini, g	dietary habits bursting into the complex pathogenesis of autoimmune diseases: the emerging role of salt from experimental and clinical studies	nutrients	2019	10.3390/nu11051013	0	1	NA	NA	NA	1_NA_NA_NA
machado, sb; cabral, r; murade, n; ares, nc; scorcine, c; fragoso, yd	dietary habits in a group of patients with multiple sclerosis are similar to those of healthy control subjects	arquivos de neuro-psiquiatria	2020	10.1590/0004-282x20200065	0	1	a	a	b	1_a_a_b
machado, sb; cabral, r; murade, n; ares, nc; scorcine, c; fragoso, yd	dietary habits in a group of patients with multiple sclerosis are similar to those of healthy control subjects	arquivos de neuro-psiquiatria	2020	10.1590/0004-282x20200065	0	1	a	a	NA	1_a_a_NA
machado, sb; cabral, r; murade, n; ares, nc; scorcine, c; fragoso, yd	dietary habits in a group of patients with multiple sclerosis are similar to those of healthy control subjects	arquivos de neuro-psiquiatria	2020	10.1590/0004-282x20200065	0	1	a	NA	NA	1_a_NA_NA
machado, sb; cabral, r; murade, n; ares, nc; scorcine, c; fragoso, yd	dietary habits in a group of patients with multiple sclerosis are similar to those of healthy control subjects	arquivos de neuro-psiquiatria	2020	10.1590/0004-282x20200065	0	1	NA	NA	NA	1_NA_NA_NA
socha, k; karpinska, e; kochanowicz, j; soroczynska, j; jakoniuk, m; wilkiel, m; mariak, zd; borawska, mh	dietary habits; concentration of copper, zinc, and cu-to-zn ratio in serum and ability status of patients with relapsing-remitting multiple sclerosis	nutrition	2017	10.1016/j.nut.2017.03.009	3	1	NA	NA	NA	1_NA_NA_NA
silva, byd; sampaio, had; shivappa, n; hebert, jr; albuquerque, ld; carioca, aaf; d'almeida, jac; maia, csc; de melo, mlp	dietary inflammatory index and clinical course of multiple sclerosis	european journal of clinical nutrition	2019	10.1038/s41430-018-0294-8	2	1	a	a	b	1_a_a_b
silva, byd; sampaio, had; shivappa, n; hebert, jr; albuquerque, ld; carioca, aaf; d'almeida, jac; maia, csc; de melo, mlp	dietary inflammatory index and clinical course of multiple sclerosis	european journal of clinical nutrition	2019	10.1038/s41430-018-0294-8	2	1	a	a	NA	1_a_a_NA
silva, byd; sampaio, had; shivappa, n; hebert, jr; albuquerque, ld; carioca, aaf; d'almeida, jac; maia, csc; de melo, mlp	dietary inflammatory index and clinical course of multiple sclerosis	european journal of clinical nutrition	2019	10.1038/s41430-018-0294-8	2	1	a	NA	NA	1_a_NA_NA
silva, byd; sampaio, had; shivappa, n; hebert, jr; albuquerque, ld; carioca, aaf; d'almeida, jac; maia, csc; de melo, mlp	dietary inflammatory index and clinical course of multiple sclerosis	european journal of clinical nutrition	2019	10.1038/s41430-018-0294-8	2	1	NA	NA	NA	1_NA_NA_NA
shivappa, n; hebert, jr; behrooz, m; rashidkhani, b	dietary inflammatory index and risk of multiple sclerosis in a case-control study from iran	neuroepidemiology	2016	10.1159/000445874	12	1	a	a	b	1_a_a_b
shivappa, n; hebert, jr; behrooz, m; rashidkhani, b	dietary inflammatory index and risk of multiple sclerosis in a case-control study from iran	neuroepidemiology	2016	10.1159/000445874	12	1	a	a	NA	1_a_a_NA
shivappa, n; hebert, jr; behrooz, m; rashidkhani, b	dietary inflammatory index and risk of multiple sclerosis in a case-control study from iran	neuroepidemiology	2016	10.1159/000445874	12	1	a	NA	NA	1_a_NA_NA
shivappa, n; hebert, jr; behrooz, m; rashidkhani, b	dietary inflammatory index and risk of multiple sclerosis in a case-control study from iran	neuroepidemiology	2016	10.1159/000445874	12	1	NA	NA	NA	1_NA_NA_NA
abdollahpour, i; jakimovski, d; shivappa, n; hebert, jr; vahid, f; nedjat, s; mansournia, ma; weinstock-guttman, b	dietary inflammatory index and risk of multiple sclerosis: findings from a large population-based incident case-control study	clinical nutrition	2020	10.1016/j.clnu.2020.02.033	2	1	a	a	a	1_a_a_a
abdollahpour, i; jakimovski, d; shivappa, n; hebert, jr; vahid, f; nedjat, s; mansournia, ma; weinstock-guttman, b	dietary inflammatory index and risk of multiple sclerosis: findings from a large population-based incident case-control study	clinical nutrition	2020	10.1016/j.clnu.2020.02.033	2	1	a	a	NA	1_a_a_NA
abdollahpour, i; jakimovski, d; shivappa, n; hebert, jr; vahid, f; nedjat, s; mansournia, ma; weinstock-guttman, b	dietary inflammatory index and risk of multiple sclerosis: findings from a large population-based incident case-control study	clinical nutrition	2020	10.1016/j.clnu.2020.02.033	2	1	a	NA	NA	1_a_NA_NA
abdollahpour, i; jakimovski, d; shivappa, n; hebert, jr; vahid, f; nedjat, s; mansournia, ma; weinstock-guttman, b	dietary inflammatory index and risk of multiple sclerosis: findings from a large population-based incident case-control study	clinical nutrition	2020	10.1016/j.clnu.2020.02.033	2	1	NA	NA	NA	1_NA_NA_NA
kheirouri, s; alizadeh, m	dietary inflammatory potential and the risk of neurodegenerative diseases in adults	epidemiologic reviews	2019	10.1093/epirev/mxz005	0	1	a	a	b	1_a_a_b
kheirouri, s; alizadeh, m	dietary inflammatory potential and the risk of neurodegenerative diseases in adults	epidemiologic reviews	2019	10.1093/epirev/mxz005	0	1	a	a	NA	1_a_a_NA
kheirouri, s; alizadeh, m	dietary inflammatory potential and the risk of neurodegenerative diseases in adults	epidemiologic reviews	2019	10.1093/epirev/mxz005	0	1	a	NA	NA	1_a_NA_NA
kheirouri, s; alizadeh, m	dietary inflammatory potential and the risk of neurodegenerative diseases in adults	epidemiologic reviews	2019	10.1093/epirev/mxz005	0	1	NA	NA	NA	1_NA_NA_NA
langley, mr; triplet, em; scarisbrick, ia	dietary influence on central nervous system myelin production, injury, and regeneration	biochimica et biophysica acta-molecular basis of disease	2020	10.1016/j.bbadis.2020.165779	1	1	b	a	NA	1_b_a_NA
langley, mr; triplet, em; scarisbrick, ia	dietary influence on central nervous system myelin production, injury, and regeneration	biochimica et biophysica acta-molecular basis of disease	2020	10.1016/j.bbadis.2020.165779	1	1	b	NA	NA	1_b_NA_NA
langley, mr; triplet, em; scarisbrick, ia	dietary influence on central nervous system myelin production, injury, and regeneration	biochimica et biophysica acta-molecular basis of disease	2020	10.1016/j.bbadis.2020.165779	1	1	NA	NA	NA	1_NA_NA_NA
ramirez-salazar, sa; herren, c; mccartney, j; garcia, jgo	dietary insights in neurological diseases	current neurology and neuroscience reports	2021	10.1007/s11910-021-01143-w	0	1	a	a	a	1_a_a_a
ramirez-salazar, sa; herren, c; mccartney, j; garcia, jgo	dietary insights in neurological diseases	current neurology and neuroscience reports	2021	10.1007/s11910-021-01143-w	0	1	a	a	NA	1_a_a_NA
ramirez-salazar, sa; herren, c; mccartney, j; garcia, jgo	dietary insights in neurological diseases	current neurology and neuroscience reports	2021	10.1007/s11910-021-01143-w	0	1	a	NA	NA	1_a_NA_NA
ramirez-salazar, sa; herren, c; mccartney, j; garcia, jgo	dietary insights in neurological diseases	current neurology and neuroscience reports	2021	10.1007/s11910-021-01143-w	0	1	NA	NA	NA	1_NA_NA_NA
venasse, m; gauthier, a; giroux, i; pilutti, la	dietary intake and characteristics in persons with multiple sclerosis	multiple sclerosis and related disorders	2021	10.1016/j.msard.2021.103237	0	1	NA	NA	NA	1_NA_NA_NA
moravejolahkami, ar; paknahad, z; chitsaz, a	dietary intake of energy and fiber in ms patients; an approach to prebiotics role	nutrition & food science	2019	10.1108/nfs-01-2019-0001	3	1	a	a	a	1_a_a_a
moravejolahkami, ar; paknahad, z; chitsaz, a	dietary intake of energy and fiber in ms patients; an approach to prebiotics role	nutrition & food science	2019	10.1108/nfs-01-2019-0001	3	1	a	a	NA	1_a_a_NA
moravejolahkami, ar; paknahad, z; chitsaz, a	dietary intake of energy and fiber in ms patients; an approach to prebiotics role	nutrition & food science	2019	10.1108/nfs-01-2019-0001	3	1	a	NA	NA	1_a_NA_NA
moravejolahkami, ar; paknahad, z; chitsaz, a	dietary intake of energy and fiber in ms patients; an approach to prebiotics role	nutrition & food science	2019	10.1108/nfs-01-2019-0001	3	1	NA	NA	NA	1_NA_NA_NA
bitarafan, s; harirchian, mh; nafissi, s; sahraian, ma; togha, m; siassi, f; saedisomeolia, a; alipour, e; mohammadpour, n; chamary, m; honarvar, nm; saboor-yaraghi, aa	dietary intake of nutrients and its correlation with fatigue in multiple sclerosis patients	iranian journal of neurology	2014	NA	12	1	a	b	NA	1_a_b_NA
bitarafan, s; harirchian, mh; nafissi, s; sahraian, ma; togha, m; siassi, f; saedisomeolia, a; alipour, e; mohammadpour, n; chamary, m; honarvar, nm; saboor-yaraghi, aa	dietary intake of nutrients and its correlation with fatigue in multiple sclerosis patients	iranian journal of neurology	2014	NA	12	1	a	NA	NA	1_a_NA_NA
bitarafan, s; harirchian, mh; nafissi, s; sahraian, ma; togha, m; siassi, f; saedisomeolia, a; alipour, e; mohammadpour, n; chamary, m; honarvar, nm; saboor-yaraghi, aa	dietary intake of nutrients and its correlation with fatigue in multiple sclerosis patients	iranian journal of neurology	2014	NA	12	1	NA	NA	NA	1_NA_NA_NA
munger, kl; chitnis, t; frazier, al; giovannucci, e; spiegelman, d; ascherio, a	dietary intake of vitamin d during adolescence and risk of multiple sclerosis	journal of neurology	2011	10.1007/s00415-010-5783-1	9	1	a	a	a	1_a_a_a
munger, kl; chitnis, t; frazier, al; giovannucci, e; spiegelman, d; ascherio, a	dietary intake of vitamin d during adolescence and risk of multiple sclerosis	journal of neurology	2011	10.1007/s00415-010-5783-1	9	1	a	a	NA	1_a_a_NA
munger, kl; chitnis, t; frazier, al; giovannucci, e; spiegelman, d; ascherio, a	dietary intake of vitamin d during adolescence and risk of multiple sclerosis	journal of neurology	2011	10.1007/s00415-010-5783-1	9	1	a	NA	NA	1_a_NA_NA
munger, kl; chitnis, t; frazier, al; giovannucci, e; spiegelman, d; ascherio, a	dietary intake of vitamin d during adolescence and risk of multiple sclerosis	journal of neurology	2011	10.1007/s00415-010-5783-1	9	1	NA	NA	NA	1_NA_NA_NA
altowaijri, g; fryman, a; yadav, v	dietary interventions and multiple sclerosis	current neurology and neuroscience reports	2017	10.1007/s11910-017-0732-3	15	1	a	a	a	1_a_a_a
altowaijri, g; fryman, a; yadav, v	dietary interventions and multiple sclerosis	current neurology and neuroscience reports	2017	10.1007/s11910-017-0732-3	15	1	a	a	NA	1_a_a_NA
altowaijri, g; fryman, a; yadav, v	dietary interventions and multiple sclerosis	current neurology and neuroscience reports	2017	10.1007/s11910-017-0732-3	15	1	a	NA	NA	1_a_NA_NA
altowaijri, g; fryman, a; yadav, v	dietary interventions and multiple sclerosis	current neurology and neuroscience reports	2017	10.1007/s11910-017-0732-3	15	1	NA	NA	NA	1_NA_NA_NA
farinotti, m; vacchi, l; simi, s; di pietrantonj, c; brait, l; filippini, g	dietary interventions for multiple sclerosis	cochrane database of systematic reviews	2012	10.1002/14651858.cd004192.pub3	42	1	a	a	a	1_a_a_a
farinotti, m; vacchi, l; simi, s; di pietrantonj, c; brait, l; filippini, g	dietary interventions for multiple sclerosis	cochrane database of systematic reviews	2012	10.1002/14651858.cd004192.pub3	42	1	a	a	NA	1_a_a_NA
farinotti, m; simi, s; di pietrantonj, c; mcdowell, n; brait, l; lupo, d; filippini, g	dietary interventions for multiple sclerosis	cochrane database of systematic reviews	2007	10.1002/14651858.cd004192.pub2	20	1	a	b	NA	1_a_b_NA
farinotti, m; vacchi, l; simi, s; di pietrantonj, c; brait, l; filippini, g	dietary interventions for multiple sclerosis	cochrane database of systematic reviews	2012	10.1002/14651858.cd004192.pub3	42	1	a	NA	NA	1_a_NA_NA
farinotti, m; simi, s; di pietrantonj, c; mcdowell, n; brait, l; lupo, d; filippini, g	dietary interventions for multiple sclerosis	cochrane database of systematic reviews	2007	10.1002/14651858.cd004192.pub2	20	1	a	NA	NA	1_a_NA_NA
farinotti, m; vacchi, l; simi, s; di pietrantonj, c; brait, l; filippini, g	dietary interventions for multiple sclerosis	cochrane database of systematic reviews	2012	10.1002/14651858.cd004192.pub3	42	1	NA	NA	NA	1_NA_NA_NA
farinotti, m; simi, s; di pietrantonj, c; mcdowell, n; brait, l; lupo, d; filippini, g	dietary interventions for multiple sclerosis	cochrane database of systematic reviews	2007	10.1002/14651858.cd004192.pub2	20	1	NA	NA	NA	1_NA_NA_NA
parks, ne; jackson-tarlton, cs; vacchi, l; merdad, r; johnston, bc	dietary interventions for multiple sclerosis-related outcomes	cochrane database of systematic reviews	2020	10.1002/14651858.cd004192.pub4	0	1	a	b	NA	1_a_b_NA
parks, ne; jackson-tarlton, cs; vacchi, l; merdad, r; johnston, bc	dietary interventions for multiple sclerosis-related outcomes	cochrane database of systematic reviews	2020	10.1002/14651858.cd004192.pub4	0	1	a	NA	NA	1_a_NA_NA
parks, ne; jackson-tarlton, cs; vacchi, l; merdad, r; johnston, bc	dietary interventions for multiple sclerosis-related outcomes	cochrane database of systematic reviews	2020	10.1002/14651858.cd004192.pub4	0	1	NA	NA	NA	1_NA_NA_NA
riemann-lorenz, k; eilers, m; von geldern, g; schulz, kh; kopke, s; heesen, c	dietary interventions in multiple sclerosis: development and pilot-testing of an evidence based patient education program	plos one	2016	10.1371/journal.pone.0165246	19	1	a	a	a	1_a_a_a
riemann-lorenz, k; eilers, m; von geldern, g; schulz, kh; kopke, s; heesen, c	dietary interventions in multiple sclerosis: development and pilot-testing of an evidence based patient education program	plos one	2016	10.1371/journal.pone.0165246	19	1	a	a	NA	1_a_a_NA
riemann-lorenz, k; eilers, m; von geldern, g; schulz, kh; kopke, s; heesen, c	dietary interventions in multiple sclerosis: development and pilot-testing of an evidence based patient education program	plos one	2016	10.1371/journal.pone.0165246	19	1	a	NA	NA	1_a_NA_NA
riemann-lorenz, k; eilers, m; von geldern, g; schulz, kh; kopke, s; heesen, c	dietary interventions in multiple sclerosis: development and pilot-testing of an evidence based patient education program	plos one	2016	10.1371/journal.pone.0165246	19	1	NA	NA	NA	1_NA_NA_NA
bates, d	dietary lipids and multiple-sclerosis	upsala journal of medical sciences	1990	NA	4	1	a	b	NA	1_a_b_NA
bates, d	dietary lipids and multiple-sclerosis	upsala journal of medical sciences	1990	NA	4	1	a	NA	NA	1_a_NA_NA
bates, d	dietary lipids and multiple-sclerosis	upsala journal of medical sciences	1990	NA	4	1	NA	NA	NA	1_NA_NA_NA
fan, yy; zhang, jm	dietary modulation of intestinal microbiota: future opportunities in experimental autoimmune encephalomyelitis and multiple sclerosis	frontiers in microbiology	2019	10.3389/fmicb.2019.00740	7	1	b	a	NA	1_b_a_NA
fan, yy; zhang, jm	dietary modulation of intestinal microbiota: future opportunities in experimental autoimmune encephalomyelitis and multiple sclerosis	frontiers in microbiology	2019	10.3389/fmicb.2019.00740	7	1	b	NA	NA	1_b_NA_NA
fan, yy; zhang, jm	dietary modulation of intestinal microbiota: future opportunities in experimental autoimmune encephalomyelitis and multiple sclerosis	frontiers in microbiology	2019	10.3389/fmicb.2019.00740	7	1	NA	NA	NA	1_NA_NA_NA
wang, jp; qi, y; niu, xl; tang, h; meydania, sn; wu, dy	dietary naringenin supplementation attenuates experimental autoimmune encephalomyelitis by modulating autoimmune inflammatory responses in mice	journal of nutritional biochemistry	2018	10.1016/j.jnutbio.2017.12.004	0	1	NA	NA	NA	1_NA_NA_NA
berer, k; martinez, i; walker, a; kunkel, b; schmitt-kopplin, p; walter, j; krishnamoorthy, g	dietary non-fermentable fiber prevents autoimmune neurological disease by changing gut metabolic and immune status	scientific reports	2018	10.1038/s41598-018-28839-3	8	1	b	a	NA	1_b_a_NA
berer, k; martinez, i; walker, a; kunkel, b; schmitt-kopplin, p; walter, j; krishnamoorthy, g	dietary non-fermentable fiber prevents autoimmune neurological disease by changing gut metabolic and immune status	scientific reports	2018	10.1038/s41598-018-28839-3	8	1	b	NA	NA	1_b_NA_NA
berer, k; martinez, i; walker, a; kunkel, b; schmitt-kopplin, p; walter, j; krishnamoorthy, g	dietary non-fermentable fiber prevents autoimmune neurological disease by changing gut metabolic and immune status	scientific reports	2018	10.1038/s41598-018-28839-3	8	1	NA	NA	NA	1_NA_NA_NA
mao, xy; yin, xx; guan, qw; xia, qx; yang, n; zhou, hh; liu, zq; jin, wl	dietary nutrition for neurological disease therapy: current status and future directions	pharmacology & therapeutics	2021	10.1016/j.pharmthera.2021.107861	1	1	b	b	NA	1_b_b_NA
mao, xy; yin, xx; guan, qw; xia, qx; yang, n; zhou, hh; liu, zq; jin, wl	dietary nutrition for neurological disease therapy: current status and future directions	pharmacology & therapeutics	2021	10.1016/j.pharmthera.2021.107861	1	1	b	NA	NA	1_b_NA_NA
mao, xy; yin, xx; guan, qw; xia, qx; yang, n; zhou, hh; liu, zq; jin, wl	dietary nutrition for neurological disease therapy: current status and future directions	pharmacology & therapeutics	2021	10.1016/j.pharmthera.2021.107861	1	1	NA	NA	NA	1_NA_NA_NA
jahromi, sr; toghae, m; jahromi, mjr; aloosh, m	dietary pattern and risk of multiple sclerosis	iranian journal of neurology	2012	NA	23	1	a	a	a	1_a_a_a
jahromi, sr; toghae, m; jahromi, mjr; aloosh, m	dietary pattern and risk of multiple sclerosis	iranian journal of neurology	2012	NA	23	1	a	a	NA	1_a_a_NA
jahromi, sr; toghae, m; jahromi, mjr; aloosh, m	dietary pattern and risk of multiple sclerosis	iranian journal of neurology	2012	NA	23	1	a	NA	NA	1_a_NA_NA
jahromi, sr; toghae, m; jahromi, mjr; aloosh, m	dietary pattern and risk of multiple sclerosis	iranian journal of neurology	2012	NA	23	1	NA	NA	NA	1_NA_NA_NA
marck, ch; probst, y; chen, j; taylor, b; van der mei, i	dietary patterns and associations with health outcomes in australian people with multiple sclerosis	european journal of clinical nutrition	2021	10.1038/s41430-021-00864-y	2	1	a	a	NA	1_a_a_NA
marck, ch; probst, y; chen, j; taylor, b; van der mei, i	dietary patterns and associations with health outcomes in australian people with multiple sclerosis	european journal of clinical nutrition	2021	10.1038/s41430-021-00864-y	2	1	a	NA	NA	1_a_NA_NA
marck, ch; probst, y; chen, j; taylor, b; van der mei, i	dietary patterns and associations with health outcomes in australian people with multiple sclerosis	european journal of clinical nutrition	2021	10.1038/s41430-021-00864-y	2	1	NA	NA	NA	1_NA_NA_NA
ramsaransing, gsm; mellema, sa; de keyser, j	dietary patterns in clinical subtypes of multiple sclerosis: an exploratory study	nutrition journal	2009	10.1186/1475-2891-8-36	10	1	a	b	NA	1_a_b_NA
ramsaransing, gsm; mellema, sa; de keyser, j	dietary patterns in clinical subtypes of multiple sclerosis: an exploratory study	nutrition journal	2009	10.1186/1475-2891-8-36	10	1	a	NA	NA	1_a_NA_NA
ramsaransing, gsm; mellema, sa; de keyser, j	dietary patterns in clinical subtypes of multiple sclerosis: an exploratory study	nutrition journal	2009	10.1186/1475-2891-8-36	10	1	NA	NA	NA	1_NA_NA_NA
blum, l; tafferner, n; spring, i; kurz, j; debruin, n; geisslinger, g; parnham, mj; schiffmann, s	dietary phytol reduces clinical symptoms in experimental autoimmune encephalomyelitis (eae) at least partially by modulating nox2 expression	journal of molecular medicine-jmm	2018	10.1007/s00109-018-1689-7	0	NA	NA	NA	NA	NA_NA_NA_NA
stefanson, a; bakovic, m	dietary polyacetylene falcarinol upregulated intestinal heme oxygenase-1 and modified plasma cytokine profile in late phase lipopolysaccharide-induced acute inflammation in cb57bl/6 mice	nutrition research	2020	10.1016/j.nutres.2020.06.014	0	NA	NA	NA	NA	NA_NA_NA_NA
kapoor, b; kapoor, d; gautam, s; singh, r; bhardwaj, s	dietary polyunsaturated fatty acids (pufas): uses and potential health benefits	current nutrition reports	2021	10.1007/s13668-021-00363-3	0	NA	NA	NA	NA	NA_NA_NA_NA
hibbeln, jr; salem, n	dietary polyunsaturated fatty-acids and depression - when cholesterol does not satisfy	american journal of clinical nutrition	1995	10.1093/ajcn/62.1.1	4	1	a	b	NA	1_a_b_NA
hibbeln, jr; salem, n	dietary polyunsaturated fatty-acids and depression - when cholesterol does not satisfy	american journal of clinical nutrition	1995	10.1093/ajcn/62.1.1	4	1	a	NA	NA	1_a_NA_NA
hibbeln, jr; salem, n	dietary polyunsaturated fatty-acids and depression - when cholesterol does not satisfy	american journal of clinical nutrition	1995	10.1093/ajcn/62.1.1	4	1	NA	NA	NA	1_NA_NA_NA
russell, rd; black, lj; sherriff, jl; begley, a	dietary responses to a multiple sclerosis diagnosis: a qualitative study	european journal of clinical nutrition	2019	10.1038/s41430-018-0252-5	5	1	a	a	a	1_a_a_a
russell, rd; black, lj; sherriff, jl; begley, a	dietary responses to a multiple sclerosis diagnosis: a qualitative study	european journal of clinical nutrition	2019	10.1038/s41430-018-0252-5	5	1	a	a	NA	1_a_a_NA
russell, rd; black, lj; sherriff, jl; begley, a	dietary responses to a multiple sclerosis diagnosis: a qualitative study	european journal of clinical nutrition	2019	10.1038/s41430-018-0252-5	5	1	a	NA	NA	1_a_NA_NA
russell, rd; black, lj; sherriff, jl; begley, a	dietary responses to a multiple sclerosis diagnosis: a qualitative study	european journal of clinical nutrition	2019	10.1038/s41430-018-0252-5	5	1	NA	NA	NA	1_NA_NA_NA
rezaeimanesh, n; moghadasi, an; sahraian, ma; eskandarieh, s	dietary risk factors of primary progressive multiple sclerosis: a population-based case-control study	multiple sclerosis and related disorders	2021	10.1016/j.msard.2021.103233	0	1	a	a	a	1_a_a_a
rezaeimanesh, n; moghadasi, an; sahraian, ma; eskandarieh, s	dietary risk factors of primary progressive multiple sclerosis: a population-based case-control study	multiple sclerosis and related disorders	2021	10.1016/j.msard.2021.103233	0	1	a	a	NA	1_a_a_NA
rezaeimanesh, n; moghadasi, an; sahraian, ma; eskandarieh, s	dietary risk factors of primary progressive multiple sclerosis: a population-based case-control study	multiple sclerosis and related disorders	2021	10.1016/j.msard.2021.103233	0	1	a	NA	NA	1_a_NA_NA
rezaeimanesh, n; moghadasi, an; sahraian, ma; eskandarieh, s	dietary risk factors of primary progressive multiple sclerosis: a population-based case-control study	multiple sclerosis and related disorders	2021	10.1016/j.msard.2021.103233	0	1	NA	NA	NA	1_NA_NA_NA
ferguson, cc; knol, ll; halli-tierney, a; ellis, ac	dietary supplement use is high among individuals with parkinson disease	southern medical journal	2019	10.14423/smj.0000000000001041	0	1	a	a	a	1_a_a_a
ferguson, cc; knol, ll; halli-tierney, a; ellis, ac	dietary supplement use is high among individuals with parkinson disease	southern medical journal	2019	10.14423/smj.0000000000001041	0	1	a	a	NA	1_a_a_NA
ferguson, cc; knol, ll; halli-tierney, a; ellis, ac	dietary supplement use is high among individuals with parkinson disease	southern medical journal	2019	10.14423/smj.0000000000001041	0	1	a	NA	NA	1_a_NA_NA
ferguson, cc; knol, ll; halli-tierney, a; ellis, ac	dietary supplement use is high among individuals with parkinson disease	southern medical journal	2019	10.14423/smj.0000000000001041	0	1	NA	NA	NA	1_NA_NA_NA
nathan, j; kale, dk; naik, v; thakker, f; bailur, s	dietary therapy in secondary progressive multiple sclerosis: a case report	cureus	2019	10.7759/cureus.5341	3	1	b	b	NA	1_b_b_NA
nathan, j; kale, dk; naik, v; thakker, f; bailur, s	dietary therapy in secondary progressive multiple sclerosis: a case report	cureus	2019	10.7759/cureus.5341	3	1	b	NA	NA	1_b_NA_NA
nathan, j; kale, dk; naik, v; thakker, f; bailur, s	dietary therapy in secondary progressive multiple sclerosis: a case report	cureus	2019	10.7759/cureus.5341	3	1	NA	NA	NA	1_NA_NA_NA
theda, c; kohler, w; moser, a; moser, h	dietary therapy of adrenoleukodystrophy - preliminary-results of a long-term study	monatsschrift kinderheilkunde	1994	NA	0	NA	NA	NA	NA	NA_NA_NA_NA
sonner, jk; keil, m; falk-paulsen, m; mishra, n; rehman, a; kramer, m; deumelandt, k; rowe, j; sanghvi, k; wolf, l; von landenberg, a; wolff, h; bharti, r; oezen, i; lanz, tv; wanke, f; tang, y; brandao, i; mohapatra, sr; epping, l; grill, a; roth, r; niesler, b; meuth, sg; opitz, ca; okun, jg; reinhardt, c; kurschus, fc; wick, w; bode, hb; rosenstiel, p; platten, m	dietary tryptophan links encephalogenicity of autoreactive t cells with gut microbial ecology	nature communications	2019	10.1038/s41467-019-12776-4	2	1	b	a	NA	1_b_a_NA
sonner, jk; keil, m; falk-paulsen, m; mishra, n; rehman, a; kramer, m; deumelandt, k; rowe, j; sanghvi, k; wolf, l; von landenberg, a; wolff, h; bharti, r; oezen, i; lanz, tv; wanke, f; tang, y; brandao, i; mohapatra, sr; epping, l; grill, a; roth, r; niesler, b; meuth, sg; opitz, ca; okun, jg; reinhardt, c; kurschus, fc; wick, w; bode, hb; rosenstiel, p; platten, m	dietary tryptophan links encephalogenicity of autoreactive t cells with gut microbial ecology	nature communications	2019	10.1038/s41467-019-12776-4	2	1	b	NA	NA	1_b_NA_NA
sonner, jk; keil, m; falk-paulsen, m; mishra, n; rehman, a; kramer, m; deumelandt, k; rowe, j; sanghvi, k; wolf, l; von landenberg, a; wolff, h; bharti, r; oezen, i; lanz, tv; wanke, f; tang, y; brandao, i; mohapatra, sr; epping, l; grill, a; roth, r; niesler, b; meuth, sg; opitz, ca; okun, jg; reinhardt, c; kurschus, fc; wick, w; bode, hb; rosenstiel, p; platten, m	dietary tryptophan links encephalogenicity of autoreactive t cells with gut microbial ecology	nature communications	2019	10.1038/s41467-019-12776-4	2	1	NA	NA	NA	1_NA_NA_NA
wergeland, s; torkildsen, o; myhr, km; aksnes, l; mork, sj; bo, l	dietary vitamin d3 supplements reduce demyelination in the cuprizone model	plos one	2011	10.1371/journal.pone.0026262	5	1	a	a	b	1_a_a_b
wergeland, s; torkildsen, o; myhr, km; aksnes, l; mork, sj; bo, l	dietary vitamin d3 supplements reduce demyelination in the cuprizone model	plos one	2011	10.1371/journal.pone.0026262	5	1	a	a	NA	1_a_a_NA
wergeland, s; torkildsen, o; myhr, km; aksnes, l; mork, sj; bo, l	dietary vitamin d3 supplements reduce demyelination in the cuprizone model	plos one	2011	10.1371/journal.pone.0026262	5	1	a	NA	NA	1_a_NA_NA
wergeland, s; torkildsen, o; myhr, km; aksnes, l; mork, sj; bo, l	dietary vitamin d3 supplements reduce demyelination in the cuprizone model	plos one	2011	10.1371/journal.pone.0026262	5	1	NA	NA	NA	1_NA_NA_NA
bosch-queralt, m; cantuti-castelvetri, l; damkou, a; schifferer, m; schlepckow, k; alexopoulos, i; lutjohann, d; klose, c; vaculciakova, l; masuda, t; prinz, m; monroe, km; di paolo, g; lewcock, jw; haass, c; simons, m	diet-dependent regulation of tgf beta impairs reparative innate immune responses after demyelination	nature metabolism	2021	10.1038/s42255-021-00341-7	0	NA	NA	NA	NA	NA_NA_NA_NA
han, sr; kang, yh; jeon, h; lee, s; park, sj; song, dy; min, ss; yoo, sm; lee, ms; lee, sh	differential expression of mirnas and behavioral change in the cuprizone-induced demyelination mouse model	international journal of molecular sciences	2020	10.3390/ijms21020646	0	2	b	NA	NA	2_b_NA_NA
han, sr; kang, yh; jeon, h; lee, s; park, sj; song, dy; min, ss; yoo, sm; lee, ms; lee, sh	differential expression of mirnas and behavioral change in the cuprizone-induced demyelination mouse model	international journal of molecular sciences	2020	10.3390/ijms21020646	0	2	NA	NA	NA	2_NA_NA_NA
juknat, a; pietr, m; kozela, e; rimmerman, n; levy, r; coppola, g; geschwind, d; vogel, z	differential transcriptional profiles mediated by exposure to the cannabinoids cannabidiol and delta(9)-tetrahydrocannabinol in bv-2 microglial cells	british journal of pharmacology	2012	10.1111/j.1476-5381.2011.01461.x	0	NA	NA	NA	NA	NA_NA_NA_NA
shahar, a; reuveny, s; zhang, m; delosmonteros, ae; devellis, j; shainberg, a	differentiation of myoblasts and cns cells grown either separately or as cocultures on microcarriers	cytotechnology	1992	10.1007/bf02521737	0	NA	NA	NA	NA	NA_NA_NA_NA
atkinson, kc; lee, jb; hasselmann, jpc; kim, sh; drew, a; soto, j; katzenellenbogen, ja; harris, ng; obenaus, a; tiwari-woodruff, sk	diffusion tensor imaging identifies aspects of therapeutic estrogen receptor beta ligand-induced remyelination in a mouse model of multiple sclerosis	neurobiology of disease	2019	10.1016/j.nbd.2019.104501	0	2	b	NA	NA	2_b_NA_NA
atkinson, kc; lee, jb; hasselmann, jpc; kim, sh; drew, a; soto, j; katzenellenbogen, ja; harris, ng; obenaus, a; tiwari-woodruff, sk	diffusion tensor imaging identifies aspects of therapeutic estrogen receptor beta ligand-induced remyelination in a mouse model of multiple sclerosis	neurobiology of disease	2019	10.1016/j.nbd.2019.104501	0	2	NA	NA	NA	2_NA_NA_NA
joscelyn, j; kasper, lh	digesting the emerging role for the gut microbiome in central nervous system demyelination	multiple sclerosis journal	2014	10.1177/1352458514541579	7	1	b	a	NA	1_b_a_NA
joscelyn, j; kasper, lh	digesting the emerging role for the gut microbiome in central nervous system demyelination	multiple sclerosis journal	2014	10.1177/1352458514541579	7	1	b	NA	NA	1_b_NA_NA
joscelyn, j; kasper, lh	digesting the emerging role for the gut microbiome in central nervous system demyelination	multiple sclerosis journal	2014	10.1177/1352458514541579	7	1	NA	NA	NA	1_NA_NA_NA
sangineto, m; grabherr, f; adolph, te; grander, c; reider, s; jaschke, n; mayr, l; schwarzler, j; dallio, m; moschen, ar; moschetta, a; sabba, c; tilg, h	dimethyl fumarate ameliorates hepatic inflammation in alcohol related liver disease	liver international	2020	10.1111/liv.14483	0	NA	NA	NA	NA	NA_NA_NA_NA
to, c; ringelberg, cs; royce, db; williams, cr; risingsong, r; sporn, mb; liby, kt	dimethyl fumarate and the oleanane triterpenoids, cddo-imidazolide and cddo-methyl ester, both activate the nrf2 pathway but have opposite effects in the a/j model of lung carcinogenesis	carcinogenesis	2015	10.1093/carcin/bgv061	1	NA	NA	NA	NA	NA_NA_NA_NA
ahmed, la; al-massri, kf	directions for enhancement of the therapeutic efficacy of mesenchymal stem cells in different neurodegenerative and cardiovascular diseases: current status and future perspectives	current stem cell research & therapy	2021	10.2174/1574888x16666210303151237	0	NA	NA	NA	NA	NA_NA_NA_NA
seeber, aa; hijdra, a; vermeulen, m; willems, dl	discussions about treatment restrictions in chronic neurologic diseases a structured review	neurology	2012	10.1212/wnl.0b013e318247cc56	0	NA	NA	NA	NA	NA_NA_NA_NA
schmitz, k; barthelmes, j; stolz, l; beyer, s; diehl, o; tegeder, i	disease modifying nutricals for multiple sclerosis	pharmacology & therapeutics	2015	10.1016/j.pharmthera.2014.11.015	8	1	a	a	a	1_a_a_a
schmitz, k; barthelmes, j; stolz, l; beyer, s; diehl, o; tegeder, i	disease modifying nutricals for multiple sclerosis	pharmacology & therapeutics	2015	10.1016/j.pharmthera.2014.11.015	8	1	a	a	NA	1_a_a_NA
schmitz, k; barthelmes, j; stolz, l; beyer, s; diehl, o; tegeder, i	disease modifying nutricals for multiple sclerosis	pharmacology & therapeutics	2015	10.1016/j.pharmthera.2014.11.015	8	1	a	NA	NA	1_a_NA_NA
schmitz, k; barthelmes, j; stolz, l; beyer, s; diehl, o; tegeder, i	disease modifying nutricals for multiple sclerosis	pharmacology & therapeutics	2015	10.1016/j.pharmthera.2014.11.015	8	1	NA	NA	NA	1_NA_NA_NA
prell, t; perner, c	disease specific aspects of malnutrition in neurogeriatric patients	frontiers in aging neuroscience	2018	10.3389/fnagi.2018.00080	0	4	NA	NA	NA	4_NA_NA_NA
sand, ik; zhu, yj; ntranos, a; clemente, jc; cekanaviciute, e; brandstadter, r; crabtree-hartman, e; singh, s; bencosme, y; debelius, j; knight, r; cree, bac; baranzini, se; casaccia, p	disease-modifying therapies alter gut microbial composition in ms	neurology-neuroimmunology & neuroinflammation	2019	10.1212/nxi.0000000000000517	0	NA	NA	NA	NA	NA_NA_NA_NA
niesler, b; kuerten, s; demir, ie; schafer, kh	disorders of the enteric nervous system - a holistic view	nature reviews gastroenterology & hepatology	2021	10.1038/s41575-020-00385-2	0	1	b	c	NA	1_b_c_NA
niesler, b; kuerten, s; demir, ie; schafer, kh	disorders of the enteric nervous system - a holistic view	nature reviews gastroenterology & hepatology	2021	10.1038/s41575-020-00385-2	0	1	b	NA	NA	1_b_NA_NA
niesler, b; kuerten, s; demir, ie; schafer, kh	disorders of the enteric nervous system - a holistic view	nature reviews gastroenterology & hepatology	2021	10.1038/s41575-020-00385-2	0	1	NA	NA	NA	1_NA_NA_NA
patel, jp; frey, bn	disruption in the blood-brain barrier: the missing link between brain and body inflammation in bipolar disorder?	neural plasticity	2015	10.1155/2015/708306	0	NA	NA	NA	NA	NA_NA_NA_NA
lauer, k	divergent risk of multiple sclerosis in two anabaptist communities in america	medical hypotheses	2006	10.1016/j.mehy.2006.03.044	3	1	a	b	NA	1_a_b_NA
lauer, k	divergent risk of multiple sclerosis in two anabaptist communities in america	medical hypotheses	2006	10.1016/j.mehy.2006.03.044	3	1	a	NA	NA	1_a_NA_NA
lauer, k	divergent risk of multiple sclerosis in two anabaptist communities in america	medical hypotheses	2006	10.1016/j.mehy.2006.03.044	3	1	NA	NA	NA	1_NA_NA_NA
han, sr; kang, yh; yoo, sm; lee, ms; lee, sh	diverse gene expressions in the prediction of cuprizone-induced demyelination	neurotoxicity research	2020	10.1007/s12640-019-00154-3	0	2	a	NA	NA	2_a_NA_NA
han, sr; kang, yh; yoo, sm; lee, ms; lee, sh	diverse gene expressions in the prediction of cuprizone-induced demyelination	neurotoxicity research	2020	10.1007/s12640-019-00154-3	0	2	NA	NA	NA	2_NA_NA_NA
nakagawa, y; chiba, k	diversity and plasticity of microglial cells in psychiatric and neurological disorders	pharmacology & therapeutics	2015	10.1016/j.pharmthera.2015.06.010	0	NA	NA	NA	NA	NA_NA_NA_NA
adkins, y; soulika, am; mackey, b; kelley, ds	docosahexaenoic acid (22:6n-3) ameliorated the onset and severity of experimental autoimmune encephalomyelitis in mice	lipids	2019	10.1002/lipd.12130	2	1	NA	NA	NA	1_NA_NA_NA
bernardo, a; giammarco, ml; de nuccio, c; ajmone-cat, ma; visentin, s; de simone, r; minghetti, l	docosahexaenoic acid promotes oligodendrocyte differentiation via ppar-gamma signalling and prevents tumor necrosis factor-alpha-dependent maturational arrest	biochimica et biophysica acta-molecular and cell biology of lipids	2017	10.1016/j.bbalip.2017.06.014	3	1	a	NA	NA	1_a_NA_NA
bernardo, a; giammarco, ml; de nuccio, c; ajmone-cat, ma; visentin, s; de simone, r; minghetti, l	docosahexaenoic acid promotes oligodendrocyte differentiation via ppar-gamma signalling and prevents tumor necrosis factor-alpha-dependent maturational arrest	biochimica et biophysica acta-molecular and cell biology of lipids	2017	10.1016/j.bbalip.2017.06.014	3	1	NA	NA	NA	1_NA_NA_NA
marck, ch; aitken, z; simpson, s; weiland, tj; jelinek, ga	does a modifiable risk factor score predict disability worsening in people with multiple sclerosis?	multiple sclerosis journal-experimental translational and clinical	2019	10.1177/2055217319881769	0	1	a	a	NA	1_a_a_NA
marck, ch; aitken, z; simpson, s; weiland, tj; jelinek, ga	does a modifiable risk factor score predict disability worsening in people with multiple sclerosis?	multiple sclerosis journal-experimental translational and clinical	2019	10.1177/2055217319881769	0	1	a	NA	NA	1_a_NA_NA
marck, ch; aitken, z; simpson, s; weiland, tj; jelinek, ga	does a modifiable risk factor score predict disability worsening in people with multiple sclerosis?	multiple sclerosis journal-experimental translational and clinical	2019	10.1177/2055217319881769	0	1	NA	NA	NA	1_NA_NA_NA
mccarty, mf	does a vegan diet reduce risk for parkinson's disease?	medical hypotheses	2001	10.1054/mehy.2000.1321	0	1	a	b	NA	1_a_b_NA
mccarty, mf	does a vegan diet reduce risk for parkinson's disease?	medical hypotheses	2001	10.1054/mehy.2000.1321	0	1	a	NA	NA	1_a_NA_NA
mccarty, mf	does a vegan diet reduce risk for parkinson's disease?	medical hypotheses	2001	10.1054/mehy.2000.1321	0	1	NA	NA	NA	1_NA_NA_NA
hadjivassiliou, m; gibson, a; daviesjones, gab; lobo, aj; stephenson, tj; milfordward, a	does cryptic gluten sensitivity play a part in neurological illness?	lancet	1996	10.1016/s0140-6736(96)90540-1	13	3	NA	NA	NA	3_NA_NA_NA
bostrom, i; landtblom, am	does the changing sex ratio of multiple sclerosis give opportunities for intervention?	acta neurologica scandinavica	2015	10.1111/ane.12430	0	1	c	a	NA	1_c_a_NA
bostrom, i; landtblom, am	does the changing sex ratio of multiple sclerosis give opportunities for intervention?	acta neurologica scandinavica	2015	10.1111/ane.12430	0	1	c	NA	NA	1_c_NA_NA
bostrom, i; landtblom, am	does the changing sex ratio of multiple sclerosis give opportunities for intervention?	acta neurologica scandinavica	2015	10.1111/ane.12430	0	1	NA	NA	NA	1_NA_NA_NA
breuer, j; loser, k; mykicki, n; wiendl, h; schwab, n	does the environment influence multiple sclerosis pathogenesis via uvb light and/or induction of vitamin d?	journal of neuroimmunology	2019	10.1016/j.jneuroim.2018.05.006	0	1	c	b	NA	1_c_b_NA
breuer, j; loser, k; mykicki, n; wiendl, h; schwab, n	does the environment influence multiple sclerosis pathogenesis via uvb light and/or induction of vitamin d?	journal of neuroimmunology	2019	10.1016/j.jneuroim.2018.05.006	0	1	c	NA	NA	1_c_NA_NA
breuer, j; loser, k; mykicki, n; wiendl, h; schwab, n	does the environment influence multiple sclerosis pathogenesis via uvb light and/or induction of vitamin d?	journal of neuroimmunology	2019	10.1016/j.jneuroim.2018.05.006	0	1	NA	NA	NA	1_NA_NA_NA
sauma, s; casaccia, p	does the gut microbiota contribute to the oligodendrocyte progenitor niche?	neuroscience letters	2020	10.1016/j.neulet.2019.134574	1	2	NA	NA	NA	2_NA_NA_NA
adamczyk-sowa, m; medrek, a; madej, p; michlicka, w; dobrakowski, p	does the gut microbiota influence immunity and inflammation in multiple sclerosis pathophysiology?	journal of immunology research	2017	10.1155/2017/7904821	2	1	b	c	NA	1_b_c_NA
adamczyk-sowa, m; medrek, a; madej, p; michlicka, w; dobrakowski, p	does the gut microbiota influence immunity and inflammation in multiple sclerosis pathophysiology?	journal of immunology research	2017	10.1155/2017/7904821	2	1	b	NA	NA	1_b_NA_NA
adamczyk-sowa, m; medrek, a; madej, p; michlicka, w; dobrakowski, p	does the gut microbiota influence immunity and inflammation in multiple sclerosis pathophysiology?	journal of immunology research	2017	10.1155/2017/7904821	2	1	NA	NA	NA	1_NA_NA_NA
wagner, cl; taylor, sn; hollis, bw	does vitamin d make the world go 'round'?	breastfeeding medicine	2008	10.1089/bfm.2008.9984	2	1	c	b	NA	1_c_b_NA
wagner, cl; taylor, sn; hollis, bw	does vitamin d make the world go 'round'?	breastfeeding medicine	2008	10.1089/bfm.2008.9984	2	1	c	NA	NA	1_c_NA_NA
wagner, cl; taylor, sn; hollis, bw	does vitamin d make the world go 'round'?	breastfeeding medicine	2008	10.1089/bfm.2008.9984	2	1	NA	NA	NA	1_NA_NA_NA
ooi, jh; waddell, a; lin, yd; albert, i; rust, lt; holden, v; cantorna, mt	dominant effects of the diet on the microbiome and the local and systemic immune response in mice	plos one	2014	10.1371/journal.pone.0086366	0	1	c	b	NA	1_c_b_NA
ooi, jh; waddell, a; lin, yd; albert, i; rust, lt; holden, v; cantorna, mt	dominant effects of the diet on the microbiome and the local and systemic immune response in mice	plos one	2014	10.1371/journal.pone.0086366	0	1	c	NA	NA	1_c_NA_NA
ooi, jh; waddell, a; lin, yd; albert, i; rust, lt; holden, v; cantorna, mt	dominant effects of the diet on the microbiome and the local and systemic immune response in mice	plos one	2014	10.1371/journal.pone.0086366	0	1	NA	NA	NA	1_NA_NA_NA
leite, f; ribeiro, l	dopaminergic pathways in obesity-associated inflammation	journal of neuroimmune pharmacology	2020	10.1007/s11481-019-09863-0	0	NA	NA	NA	NA	NA_NA_NA_NA
escribano, bm; luque, e; aguilar-luque, m; feijoo, m; caballero-villarraso, j; torres, la; ramirez, v; garcia-maceira, fi; aguera, e; santamaria, a; tunez, i	dose-dependent s-allyl cysteine ameliorates multiple sclerosis disease-related pathology by reducing oxidative stress and biomarkers of dysbiosis in experimental autoimmune encephalomyelitis	european journal of pharmacology	2017	10.1016/j.ejphar.2017.09.025	0	NA	NA	NA	NA	NA_NA_NA_NA
millar, jhd; zilkha, kj; langman, mjs; wright, hp; smith, ad; belin, j; thompson, rh	double-blind trial of linoleate supplementation of diet in multiple-sclerosis	bmj-british medical journal	1973	10.1136/bmj.1.5856.765	31	1	a	b	NA	1_a_b_NA
millar, jhd; zilkha, kj; langman, mjs; wright, hp; smith, ad; belin, j; thompson, rh	double-blind trial of linoleate supplementation of diet in multiple-sclerosis	bmj-british medical journal	1973	10.1136/bmj.1.5856.765	31	1	a	NA	NA	1_a_NA_NA
millar, jhd; zilkha, kj; langman, mjs; wright, hp; smith, ad; belin, j; thompson, rh	double-blind trial of linoleate supplementation of diet in multiple-sclerosis	bmj-british medical journal	1973	10.1136/bmj.1.5856.765	31	1	NA	NA	NA	1_NA_NA_NA
gregg, jr; herring, nr; naydenov, av; hanlin, rp; konradi, c	downregulation of oligodendrocyte transcripts is associated with impaired prefrontal cortex function in rats	schizophrenia research	2009	10.1016/j.schres.2009.05.023	5	2	a	NA	NA	2_a_NA_NA
gregg, jr; herring, nr; naydenov, av; hanlin, rp; konradi, c	downregulation of oligodendrocyte transcripts is associated with impaired prefrontal cortex function in rats	schizophrenia research	2009	10.1016/j.schres.2009.05.023	5	2	NA	NA	NA	2_NA_NA_NA
forster, vj; van delft, fw; baird, sf; mair, s; skinner, r; halsey, c	drug interactions may be important risk factors for methotrexate neurotoxicity, particularly in pediatric leukemia patients	cancer chemotherapy and pharmacology	2016	10.1007/s00280-016-3153-0	0	NA	NA	NA	NA	NA_NA_NA_NA
cintas, p	drug therapy for symptomatic relief in als	revue neurologique	2006	NA	0	NA	NA	NA	NA	NA_NA_NA_NA
shible, aa; ramadurai, d; gergen, d; reynolds, pm	dry beriberi due to thiamine deficiency associated with peripheral neuropathy and wernicke's encephalopathy mimicking guillain-barre syndrome: a case report and review of the literature	american journal of case reports	2019	10.12659/ajcr.914051	0	NA	NA	NA	NA	NA_NA_NA_NA
miljkovic, d; dekanski, d; miljkovic, z; momcilovic, m; mostarica-stojkovic, m	dry olive leaf extract ameliorates experimental autoimmune encephalomyelitis	clinical nutrition	2009	10.1016/j.clnu.2009.03.014	3	1	a	a	a	1_a_a_a
miljkovic, d; dekanski, d; miljkovic, z; momcilovic, m; mostarica-stojkovic, m	dry olive leaf extract ameliorates experimental autoimmune encephalomyelitis	clinical nutrition	2009	10.1016/j.clnu.2009.03.014	3	1	a	a	NA	1_a_a_NA
miljkovic, d; dekanski, d; miljkovic, z; momcilovic, m; mostarica-stojkovic, m	dry olive leaf extract ameliorates experimental autoimmune encephalomyelitis	clinical nutrition	2009	10.1016/j.clnu.2009.03.014	3	1	a	NA	NA	1_a_NA_NA
miljkovic, d; dekanski, d; miljkovic, z; momcilovic, m; mostarica-stojkovic, m	dry olive leaf extract ameliorates experimental autoimmune encephalomyelitis	clinical nutrition	2009	10.1016/j.clnu.2009.03.014	3	1	NA	NA	NA	1_NA_NA_NA
trask, aj; katz, ps; kelly, ap; galantowicz, ml; cismowski, mj; west, ta; neeb, zp; berwick, zc; goodwill, ag; alloosh, m; tune, jd; sturek, m; lucchesi, pa	dynamic micro- and macrovascular remodeling in coronary circulation of obese ossabaw pigs with metabolic syndrome	journal of applied physiology	2012	10.1152/japplphysiol.00604.2012	0	NA	NA	NA	NA	NA_NA_NA_NA
gil-martins, e; barbosa, dj; silva, v; remiao, f; silva, r	dysfunction of abc transporters at the blood-brain barrier: role in neurological disorders	pharmacology & therapeutics	2020	10.1016/j.pharmthera.2020.107554	1	1	b	b	NA	1_b_b_NA
gil-martins, e; barbosa, dj; silva, v; remiao, f; silva, r	dysfunction of abc transporters at the blood-brain barrier: role in neurological disorders	pharmacology & therapeutics	2020	10.1016/j.pharmthera.2020.107554	1	1	b	NA	NA	1_b_NA_NA
gil-martins, e; barbosa, dj; silva, v; remiao, f; silva, r	dysfunction of abc transporters at the blood-brain barrier: role in neurological disorders	pharmacology & therapeutics	2020	10.1016/j.pharmthera.2020.107554	1	1	NA	NA	NA	1_NA_NA_NA
thomas, fj; wiles, cm	dysphagia and nutritional status in multiple sclerosis	journal of neurology	1999	10.1007/s004150050431	17	4	NA	NA	NA	4_NA_NA_NA
calcagno, p; ruoppolo, g; grasso, mg; de vincentiis, m; paolucci, s	dysphagia in multiple sclerosis - prevalence and prognostic factors	acta neurologica scandinavica	2002	10.1034/j.1600-0404.2002.10062.x	10	4	NA	NA	NA	4_NA_NA_NA
alali, d; ballard, k; vucic, s; bogaardt, h	dysphagia in multiple sclerosis: evaluation and validation of the dymus questionnaire	dysphagia	2018	10.1007/s00455-017-9864-5	0	1	a	b	NA	1_a_b_NA
alali, d; ballard, k; vucic, s; bogaardt, h	dysphagia in multiple sclerosis: evaluation and validation of the dymus questionnaire	dysphagia	2018	10.1007/s00455-017-9864-5	0	1	a	NA	NA	1_a_NA_NA
alali, d; ballard, k; vucic, s; bogaardt, h	dysphagia in multiple sclerosis: evaluation and validation of the dymus questionnaire	dysphagia	2018	10.1007/s00455-017-9864-5	0	1	NA	NA	NA	1_NA_NA_NA
gonzalez-fernandez, m; daniels, sk	dysphagia in stroke and neurologic disease	physical medicine and rehabilitation clinics of north america	2008	10.1016/j.pmr.2008.07.001	2	4	NA	NA	NA	4_NA_NA_NA
altman, kw; richards, a; goldberg, l; frucht, s; mccabe, dj	dysphagia in stroke, neurodegenerative disease, and advanced dementia	otolaryngologic clinics of north america	2013	10.1016/j.otc.2013.08.005	1	4	NA	NA	NA	4_NA_NA_NA
feldman, d; gonzalez-fernandez, m	dysphagia: neurological and behavioral aspects	handbook of behavior, food and nutrition	2011	10.1007/978-0-387-92271-3_88	0	4	NA	NA	NA	4_NA_NA_NA
trabjerg, ms; morkholt, as; lichota, j; oklinski, mke; andersen, dc; jonsson, k; mork, k; skjonnemand, mln; kroese, lj; pritchard, cej; huijbers, ij; gazerani, p; corthals, a; nieland, jdv	dysregulation of metabolic pathways by carnitine palmitoyl-transferase 1 plays a key role in central nervous system disorders: experimental evidence based on animal models	scientific reports	2020	10.1038/s41598-020-72638-8	0	1	b	d	NA	1_b_d_NA
trabjerg, ms; morkholt, as; lichota, j; oklinski, mke; andersen, dc; jonsson, k; mork, k; skjonnemand, mln; kroese, lj; pritchard, cej; huijbers, ij; gazerani, p; corthals, a; nieland, jdv	dysregulation of metabolic pathways by carnitine palmitoyl-transferase 1 plays a key role in central nervous system disorders: experimental evidence based on animal models	scientific reports	2020	10.1038/s41598-020-72638-8	0	1	b	NA	NA	1_b_NA_NA
trabjerg, ms; morkholt, as; lichota, j; oklinski, mke; andersen, dc; jonsson, k; mork, k; skjonnemand, mln; kroese, lj; pritchard, cej; huijbers, ij; gazerani, p; corthals, a; nieland, jdv	dysregulation of metabolic pathways by carnitine palmitoyl-transferase 1 plays a key role in central nervous system disorders: experimental evidence based on animal models	scientific reports	2020	10.1038/s41598-020-72638-8	0	1	NA	NA	NA	1_NA_NA_NA
cai, z; finnie, jw; blumbergs, pc; manavis, j; ghabriel, mn; thompson, pd	early paranodal myelin swellings (tomacula) in an avian riboflavin deficiency model of demyelinating neuropathy	experimental neurology	2006	10.1016/j.expneurol.2005.10.028	2	NA	NA	NA	NA	NA_NA_NA_NA
oakden, w; bock, na; al-ebraheem, a; farquharson, mj; stanisz, gj	early regional cuprizone-induced demyelination in a rat model revealed with mri	nmr in biomedicine	2017	10.1002/nbm.3743	0	2	a	NA	NA	2_a_NA_NA
oakden, w; bock, na; al-ebraheem, a; farquharson, mj; stanisz, gj	early regional cuprizone-induced demyelination in a rat model revealed with mri	nmr in biomedicine	2017	10.1002/nbm.3743	0	2	NA	NA	NA	2_NA_NA_NA
shelton, rc; miller, ah	eating ourselves to death (and despair): the contribution of adiposity and inflammation to depression	progress in neurobiology	2010	10.1016/j.pneurobio.2010.04.004	1	1	a	a	NA	1_a_a_NA
shelton, rc; miller, ah	eating ourselves to death (and despair): the contribution of adiposity and inflammation to depression	progress in neurobiology	2010	10.1016/j.pneurobio.2010.04.004	1	1	a	NA	NA	1_a_NA_NA
shelton, rc; miller, ah	eating ourselves to death (and despair): the contribution of adiposity and inflammation to depression	progress in neurobiology	2010	10.1016/j.pneurobio.2010.04.004	1	1	NA	NA	NA	1_NA_NA_NA
titcomb, tj; bisht, b; moore, dd; chhonker, ys; murry, dj; snetselaar, lg; wahls, tl	eating pattern and nutritional risks among people with multiple sclerosis following a modified paleolithic diet	nutrients	2020	10.3390/nu12061844	2	1	a	a	a	1_a_a_a
titcomb, tj; bisht, b; moore, dd; chhonker, ys; murry, dj; snetselaar, lg; wahls, tl	eating pattern and nutritional risks among people with multiple sclerosis following a modified paleolithic diet	nutrients	2020	10.3390/nu12061844	2	1	a	a	NA	1_a_a_NA
titcomb, tj; bisht, b; moore, dd; chhonker, ys; murry, dj; snetselaar, lg; wahls, tl	eating pattern and nutritional risks among people with multiple sclerosis following a modified paleolithic diet	nutrients	2020	10.3390/nu12061844	2	1	a	NA	NA	1_a_NA_NA
titcomb, tj; bisht, b; moore, dd; chhonker, ys; murry, dj; snetselaar, lg; wahls, tl	eating pattern and nutritional risks among people with multiple sclerosis following a modified paleolithic diet	nutrients	2020	10.3390/nu12061844	2	1	NA	NA	NA	1_NA_NA_NA
klejbor, i; shimshek, dr; klimaszewska-lata, j; velasco-estevez, m; morys, j; karaszewski, b; szutowicz, a; rutkowska, a	ebi2 is expressed in glial cells in multiple sclerosis lesions, and its knock-out modulates remyelination in the cuprizone model	european journal of neuroscience	2021	10.1111/ejn.15359	0	1	a	a	a	1_a_a_a
klejbor, i; shimshek, dr; klimaszewska-lata, j; velasco-estevez, m; morys, j; karaszewski, b; szutowicz, a; rutkowska, a	ebi2 is expressed in glial cells in multiple sclerosis lesions, and its knock-out modulates remyelination in the cuprizone model	european journal of neuroscience	2021	10.1111/ejn.15359	0	1	a	a	NA	1_a_a_NA
klejbor, i; shimshek, dr; klimaszewska-lata, j; velasco-estevez, m; morys, j; karaszewski, b; szutowicz, a; rutkowska, a	ebi2 is expressed in glial cells in multiple sclerosis lesions, and its knock-out modulates remyelination in the cuprizone model	european journal of neuroscience	2021	10.1111/ejn.15359	0	1	a	NA	NA	1_a_NA_NA
klejbor, i; shimshek, dr; klimaszewska-lata, j; velasco-estevez, m; morys, j; karaszewski, b; szutowicz, a; rutkowska, a	ebi2 is expressed in glial cells in multiple sclerosis lesions, and its knock-out modulates remyelination in the cuprizone model	european journal of neuroscience	2021	10.1111/ejn.15359	0	1	NA	NA	NA	1_NA_NA_NA
sahraian, ma; moghadasi, an; eskandarieh, s	economic sanctions against iran as an important factor in threatening the health of patients with multiple sclerosis	current journal of neurology	2021	10.18502/cjn.v20i1.6375	0	NA	NA	NA	NA	NA_NA_NA_NA
sampson, ha; sicherer, sh	eczema and food hypersensitivity	immunology and allergy clinics of north america	1999	10.1016/s0889-8561(05)70104-1	0	NA	NA	NA	NA	NA_NA_NA_NA
sridharan, a; bendlin, bb; gallagher, cl; oh, jm; willette, aa; alexander, al; kemnitz, jw; colman, rj; weindruch, rh; johnson, sc	effect of age and calorie restriction on corpus callosal integrity in rhesus macaques: a fiber tractography study	neuroscience letters	2014	10.1016/j.neulet.2014.03.047	0	NA	NA	NA	NA	NA_NA_NA_NA
de felice, b; damiano, s; montanino, c; del buono, a; la rosa, g; guida, b; santillo, m	effect of beta- and alpha-glucans on immune modulating factors expression in enterocyte-like caco-2 and goblet-like ls 174t cells	international journal of biological macromolecules	2020	10.1016/j.ijbiomac.2020.03.046	0	NA	NA	NA	NA	NA_NA_NA_NA
tahmasebi, f; barati, s; kashani, ir	effect of csf1r inhibitor on glial cells population and remyelination in the cuprizone model	neuropeptides	2021	10.1016/j.npep.2021.102179	0	NA	NA	NA	NA	NA_NA_NA_NA
pereira, mt; malik, m; nostro, ja; mahler, gj; musselman, lp	effect of dietary additives on intestinal permeability in both drosophila and a human cell co-culture	disease models & mechanisms	2018	10.1242/dmm.034520	0	1	b	a	NA	1_b_a_NA
pereira, mt; malik, m; nostro, ja; mahler, gj; musselman, lp	effect of dietary additives on intestinal permeability in both drosophila and a human cell co-culture	disease models & mechanisms	2018	10.1242/dmm.034520	0	1	b	NA	NA	1_b_NA_NA
pereira, mt; malik, m; nostro, ja; mahler, gj; musselman, lp	effect of dietary additives on intestinal permeability in both drosophila and a human cell co-culture	disease models & mechanisms	2018	10.1242/dmm.034520	0	1	NA	NA	NA	1_NA_NA_NA
nordvik, i; myhr, km; nyland, h; bjerve, ks	effect of dietary advice and n-3 supplementation in newly diagnosed ms patients	acta neurologica scandinavica	2000	10.1034/j.1600-0404.2000.102003143.x	33	1	a	b	NA	1_a_b_NA
nordvik, i; myhr, km; nyland, h; bjerve, ks	effect of dietary advice and n-3 supplementation in newly diagnosed ms patients	acta neurologica scandinavica	2000	10.1034/j.1600-0404.2000.102003143.x	33	1	a	NA	NA	1_a_NA_NA
nordvik, i; myhr, km; nyland, h; bjerve, ks	effect of dietary advice and n-3 supplementation in newly diagnosed ms patients	acta neurologica scandinavica	2000	10.1034/j.1600-0404.2000.102003143.x	33	1	NA	NA	NA	1_NA_NA_NA
fitzgerald, kc; vizthum, d; henry-barron, b; schweitzer, a; cassard, sd; kossoff, e; hartman, al; kapogiannis, d; sullivan, p; baer, dj; mattson, mp; appel, lj; mowry, em	effect of intermittent vs. daily calorie restriction on changes in weight and patient-reported outcomes in people with multiple sclerosis	multiple sclerosis and related disorders	2018	10.1016/j.msard.2018.05.002	18	1	b	b	NA	1_b_b_NA
fitzgerald, kc; vizthum, d; henry-barron, b; schweitzer, a; cassard, sd; kossoff, e; hartman, al; kapogiannis, d; sullivan, p; baer, dj; mattson, mp; appel, lj; mowry, em	effect of intermittent vs. daily calorie restriction on changes in weight and patient-reported outcomes in people with multiple sclerosis	multiple sclerosis and related disorders	2018	10.1016/j.msard.2018.05.002	18	1	b	NA	NA	1_b_NA_NA
fitzgerald, kc; vizthum, d; henry-barron, b; schweitzer, a; cassard, sd; kossoff, e; hartman, al; kapogiannis, d; sullivan, p; baer, dj; mattson, mp; appel, lj; mowry, em	effect of intermittent vs. daily calorie restriction on changes in weight and patient-reported outcomes in people with multiple sclerosis	multiple sclerosis and related disorders	2018	10.1016/j.msard.2018.05.002	18	1	NA	NA	NA	1_NA_NA_NA
bianchi, ve; herrera, pf; laura, r	effect of nutrition on neurodegenerative diseases. a systematic review	nutritional neuroscience	2021	10.1080/1028415x.2019.1681088	0	1	a	a	a	1_a_a_a
bianchi, ve; herrera, pf; laura, r	effect of nutrition on neurodegenerative diseases. a systematic review	nutritional neuroscience	2021	10.1080/1028415x.2019.1681088	0	1	a	a	NA	1_a_a_NA
bianchi, ve; herrera, pf; laura, r	effect of nutrition on neurodegenerative diseases. a systematic review	nutritional neuroscience	2021	10.1080/1028415x.2019.1681088	0	1	a	NA	NA	1_a_NA_NA
bianchi, ve; herrera, pf; laura, r	effect of nutrition on neurodegenerative diseases. a systematic review	nutritional neuroscience	2021	10.1080/1028415x.2019.1681088	0	1	NA	NA	NA	1_NA_NA_NA
alammar, wa; albeesh, fh; ibrahim, lm; algindan, yy; yamani, lz; khattab, ry	effect of omega-3 fatty acids and fish oil supplementation on multiple sclerosis: a systematic review	nutritional neuroscience	2021	10.1080/1028415x.2019.1659560	2	1	a	a	a	1_a_a_a
alammar, wa; albeesh, fh; ibrahim, lm; algindan, yy; yamani, lz; khattab, ry	effect of omega-3 fatty acids and fish oil supplementation on multiple sclerosis: a systematic review	nutritional neuroscience	2021	10.1080/1028415x.2019.1659560	2	1	a	a	NA	1_a_a_NA
alammar, wa; albeesh, fh; ibrahim, lm; algindan, yy; yamani, lz; khattab, ry	effect of omega-3 fatty acids and fish oil supplementation on multiple sclerosis: a systematic review	nutritional neuroscience	2021	10.1080/1028415x.2019.1659560	2	1	a	NA	NA	1_a_NA_NA
alammar, wa; albeesh, fh; ibrahim, lm; algindan, yy; yamani, lz; khattab, ry	effect of omega-3 fatty acids and fish oil supplementation on multiple sclerosis: a systematic review	nutritional neuroscience	2021	10.1080/1028415x.2019.1659560	2	1	NA	NA	NA	1_NA_NA_NA
corrales, gp; lopez, cv; payero, ma	effect of pharmacologic treatment of the nutritional status of neurologic patients	nutricion hospitalaria	2014	NA	0	NA	NA	NA	NA	NA_NA_NA_NA
romero, mdc; pliego-rivero, fb; altamirano, bm; otero, ga	effect of postlactation iron deficiency on the composition of fatty acids of whole brain myelin	nutritional neuroscience	2010	10.1179/147683010x12611460764606	0	NA	NA	NA	NA	NA_NA_NA_NA
lobzhanidze, g; lordkipanidze, t; zhvania, m; japaridze, n; macfabe, df; pochkidze, n; gasimov, e; rzaev, f	effect of propionic acid on the morphology of the amygdala in adolescent male rats and their behavior	micron	2019	10.1016/j.micron.2019.102732	0	NA	NA	NA	NA	NA_NA_NA_NA
askari, g; ghavami, a; shahdadian, f; moravejolahkami, ar	effect of synbiotics and probiotics supplementation on autoimmune diseases: a systematic review and meta-analysis of clinical trials*	clinical nutrition	2021	10.1016/j.clnu.2021.02.015	0	1	b	c	NA	1_b_c_NA
askari, g; ghavami, a; shahdadian, f; moravejolahkami, ar	effect of synbiotics and probiotics supplementation on autoimmune diseases: a systematic review and meta-analysis of clinical trials*	clinical nutrition	2021	10.1016/j.clnu.2021.02.015	0	1	b	NA	NA	1_b_NA_NA
askari, g; ghavami, a; shahdadian, f; moravejolahkami, ar	effect of synbiotics and probiotics supplementation on autoimmune diseases: a systematic review and meta-analysis of clinical trials*	clinical nutrition	2021	10.1016/j.clnu.2021.02.015	0	1	NA	NA	NA	1_NA_NA_NA
tahmasebi, f; pasbakhsh, p; mortezaee, k; madadi, s; barati, s; kashani, ir	effect of the csf1r inhibitor plx3397 on remyelination of corpus callosum in a cuprizone-induced demyelination mouse model	journal of cellular biochemistry	2019	10.1002/jcb.28344	0	2	a	NA	NA	2_a_NA_NA
tahmasebi, f; pasbakhsh, p; mortezaee, k; madadi, s; barati, s; kashani, ir	effect of the csf1r inhibitor plx3397 on remyelination of corpus callosum in a cuprizone-induced demyelination mouse model	journal of cellular biochemistry	2019	10.1002/jcb.28344	0	2	NA	NA	NA	2_NA_NA_NA
alappat, l; valerio, m; awad, ab	effect of vitamin d and beta-sitosterol on immune function of macrophages	international immunopharmacology	2010	10.1016/j.intimp.2010.08.003	0	1	c	b	NA	1_c_b_NA
alappat, l; valerio, m; awad, ab	effect of vitamin d and beta-sitosterol on immune function of macrophages	international immunopharmacology	2010	10.1016/j.intimp.2010.08.003	0	1	c	NA	NA	1_c_NA_NA
alappat, l; valerio, m; awad, ab	effect of vitamin d and beta-sitosterol on immune function of macrophages	international immunopharmacology	2010	10.1016/j.intimp.2010.08.003	0	1	NA	NA	NA	1_NA_NA_NA
hochmeister, s; aeinehband, s; dorris, c; berglund, r; haindl, mt; velikic, v; gustafsson, sa; olsson, t; piehl, f; jagodic, m; zeitelhofer, m; adzemovic, mz	effect of vitamin d on experimental autoimmune neuroinflammation is dependent on haplotypes comprising naturally occurring allelic variants of ciita (mhc2ta)	frontiers in neurology	2020	10.3389/fneur.2020.600401	0	1	c	a	NA	1_c_a_NA
hochmeister, s; aeinehband, s; dorris, c; berglund, r; haindl, mt; velikic, v; gustafsson, sa; olsson, t; piehl, f; jagodic, m; zeitelhofer, m; adzemovic, mz	effect of vitamin d on experimental autoimmune neuroinflammation is dependent on haplotypes comprising naturally occurring allelic variants of ciita (mhc2ta)	frontiers in neurology	2020	10.3389/fneur.2020.600401	0	1	c	NA	NA	1_c_NA_NA
hochmeister, s; aeinehband, s; dorris, c; berglund, r; haindl, mt; velikic, v; gustafsson, sa; olsson, t; piehl, f; jagodic, m; zeitelhofer, m; adzemovic, mz	effect of vitamin d on experimental autoimmune neuroinflammation is dependent on haplotypes comprising naturally occurring allelic variants of ciita (mhc2ta)	frontiers in neurology	2020	10.3389/fneur.2020.600401	0	1	NA	NA	NA	1_NA_NA_NA
paintlia, mk; singh, i; singh, ak	effect of vitamin d3 intake on the onset of disease in a murine model of human krabbe disease	journal of neuroscience research	2015	10.1002/jnr.23476	0	1	c	b	NA	1_c_b_NA
paintlia, mk; singh, i; singh, ak	effect of vitamin d3 intake on the onset of disease in a murine model of human krabbe disease	journal of neuroscience research	2015	10.1002/jnr.23476	0	1	c	NA	NA	1_c_NA_NA
paintlia, mk; singh, i; singh, ak	effect of vitamin d3 intake on the onset of disease in a murine model of human krabbe disease	journal of neuroscience research	2015	10.1002/jnr.23476	0	1	NA	NA	NA	1_NA_NA_NA
neill, j; belan, i; ried, k	effectiveness of non-pharmacological interventions for fatigue in adults with multiple sclerosis, rheumatoid arthritis, or systemic lupus erythematosus: a systematic review	journal of advanced nursing	2006	10.1111/j.1365-2648.2006.04054.x	2	NA	NA	NA	NA	NA_NA_NA_NA
berezowska, m; coe, s; dawes, h	effectiveness of vitamin d supplementation in the management of multiple sclerosis: a systematic review	international journal of molecular sciences	2019	10.3390/ijms20061301	4	1	a	a	a	1_a_a_a
berezowska, m; coe, s; dawes, h	effectiveness of vitamin d supplementation in the management of multiple sclerosis: a systematic review	international journal of molecular sciences	2019	10.3390/ijms20061301	4	1	a	a	NA	1_a_a_NA
berezowska, m; coe, s; dawes, h	effectiveness of vitamin d supplementation in the management of multiple sclerosis: a systematic review	international journal of molecular sciences	2019	10.3390/ijms20061301	4	1	a	NA	NA	1_a_NA_NA
berezowska, m; coe, s; dawes, h	effectiveness of vitamin d supplementation in the management of multiple sclerosis: a systematic review	international journal of molecular sciences	2019	10.3390/ijms20061301	4	1	NA	NA	NA	1_NA_NA_NA
mauriz, e; laliena, a; vallejo, d; tunon, mj; rodriguez-lopez, jm; rodriguez-perez, r; garcia-fernandez, mc	effects of a low-fat diet with antioxidant supplementation on biochemical markers of multiple sclerosis long-term care residents	nutricion hospitalaria	2013	10.3305/nh.2013.28.6.6983	6	1	a	a	a	1_a_a_a
mauriz, e; laliena, a; vallejo, d; tunon, mj; rodriguez-lopez, jm; rodriguez-perez, r; garcia-fernandez, mc	effects of a low-fat diet with antioxidant supplementation on biochemical markers of multiple sclerosis long-term care residents	nutricion hospitalaria	2013	10.3305/nh.2013.28.6.6983	6	1	a	a	NA	1_a_a_NA
mauriz, e; laliena, a; vallejo, d; tunon, mj; rodriguez-lopez, jm; rodriguez-perez, r; garcia-fernandez, mc	effects of a low-fat diet with antioxidant supplementation on biochemical markers of multiple sclerosis long-term care residents	nutricion hospitalaria	2013	10.3305/nh.2013.28.6.6983	6	1	a	NA	NA	1_a_NA_NA
mauriz, e; laliena, a; vallejo, d; tunon, mj; rodriguez-lopez, jm; rodriguez-perez, r; garcia-fernandez, mc	effects of a low-fat diet with antioxidant supplementation on biochemical markers of multiple sclerosis long-term care residents	nutricion hospitalaria	2013	10.3305/nh.2013.28.6.6983	6	1	NA	NA	NA	1_NA_NA_NA
bisht, b; darling, wg; white, ec; white, ka; shivapour, et; zimmerman, mb; wahls, tl	effects of a multimodal intervention on gait and balance of subjects with progressive multiple sclerosis: a prospective longitudinal pilot study	degenerative neurological and neuromuscular disease	2017	10.2147/dnnd.s128872	11	1	a	a	a	1_a_a_a
bisht, b; darling, wg; white, ec; white, ka; shivapour, et; zimmerman, mb; wahls, tl	effects of a multimodal intervention on gait and balance of subjects with progressive multiple sclerosis: a prospective longitudinal pilot study	degenerative neurological and neuromuscular disease	2017	10.2147/dnnd.s128872	11	1	a	a	NA	1_a_a_NA
bisht, b; darling, wg; white, ec; white, ka; shivapour, et; zimmerman, mb; wahls, tl	effects of a multimodal intervention on gait and balance of subjects with progressive multiple sclerosis: a prospective longitudinal pilot study	degenerative neurological and neuromuscular disease	2017	10.2147/dnnd.s128872	11	1	a	NA	NA	1_a_NA_NA
bisht, b; darling, wg; white, ec; white, ka; shivapour, et; zimmerman, mb; wahls, tl	effects of a multimodal intervention on gait and balance of subjects with progressive multiple sclerosis: a prospective longitudinal pilot study	degenerative neurological and neuromuscular disease	2017	10.2147/dnnd.s128872	11	1	NA	NA	NA	1_NA_NA_NA
urbach-ross, d; kusnecov, aw	effects of acute and repeated exposure to lipopolysaccharide on cytokine and corticosterone production during remyelination	brain behavior and immunity	2007	10.1016/j.bbi.2007.03.010	0	2	a	NA	NA	2_a_NA_NA
urbach-ross, d; kusnecov, aw	effects of acute and repeated exposure to lipopolysaccharide on cytokine and corticosterone production during remyelination	brain behavior and immunity	2007	10.1016/j.bbi.2007.03.010	0	2	NA	NA	NA	2_NA_NA_NA
shaafi, s; ebrahimpour-koujan, s; khalili, m; shamshirgaran, sm; hashemilar, m; taheraghdam, a; shakouri, sk; hokmabadi, es; ahmadi, y; farhoudi, m; rezaeimanesh, n; osgoueil, ds	effects of alpha lipoic acid supplementation on serum levels of oxidative stress, inflammatory markers and clinical prognosis among acute ischemic stroke patients: a randomized, double blind, tns trial	advanced pharmaceutical bulletin	2020	10.34172/apb.2020.034	0	NA	NA	NA	NA	NA_NA_NA_NA
cestaro, b	effects of arginine, s-adenosylmethionine and polyamines on nerve regeneration	acta neurologica scandinavica	1994	10.1111/j.1600-0404.1994.tb05407.x	0	NA	NA	NA	NA	NA_NA_NA_NA
leal, cam; leal, dbr; adefegha, sa; morsch, vm; beckmann, dv; castilhos, lg; thorstenberg, mlp; jaques, jad; souza, vdg; farias, jg; martins, cc; schetinger, mrc	effects of chlorogenic acid on adenine nucleotides hydrolyzing enzyme activities and expression in platelets of rats experimentally demyelinated with ethidium bromide	biomedicine & pharmacotherapy	2016	10.1016/j.biopha.2016.04.003	0	NA	NA	NA	NA	NA_NA_NA_NA
rezapour-firouzi, s; mohammadian, m; sadeghzadeh, m; mazloomi, e	effects of co-administration of rapamycin and evening primrose/hemp seed oil supplement on immunologic factors and cell membrane fatty acids in experimental autoimmune encephalomyelitis	gene	2020	10.1016/j.gene.2020.144987	0	1	a	a	b	1_a_a_b
rezapour-firouzi, s; mohammadian, m; sadeghzadeh, m; mazloomi, e	effects of co-administration of rapamycin and evening primrose/hemp seed oil supplement on immunologic factors and cell membrane fatty acids in experimental autoimmune encephalomyelitis	gene	2020	10.1016/j.gene.2020.144987	0	1	a	a	NA	1_a_a_NA
rezapour-firouzi, s; mohammadian, m; sadeghzadeh, m; mazloomi, e	effects of co-administration of rapamycin and evening primrose/hemp seed oil supplement on immunologic factors and cell membrane fatty acids in experimental autoimmune encephalomyelitis	gene	2020	10.1016/j.gene.2020.144987	0	1	a	NA	NA	1_a_NA_NA
rezapour-firouzi, s; mohammadian, m; sadeghzadeh, m; mazloomi, e	effects of co-administration of rapamycin and evening primrose/hemp seed oil supplement on immunologic factors and cell membrane fatty acids in experimental autoimmune encephalomyelitis	gene	2020	10.1016/j.gene.2020.144987	0	1	NA	NA	NA	1_NA_NA_NA
liebetanz, d; merkler, d	effects of commissural de- and remyelination on motor skill behaviour in the cuprizone mouse model of multiple sclerosis	experimental neurology	2006	10.1016/j.expneurol.2006.05.032	10	2	a	NA	NA	2_a_NA_NA
liebetanz, d; merkler, d	effects of commissural de- and remyelination on motor skill behaviour in the cuprizone mouse model of multiple sclerosis	experimental neurology	2006	10.1016/j.expneurol.2006.05.032	10	2	NA	NA	NA	2_NA_NA_NA
hagemeier, j; tong, o; dwyer, mg; schweser, f; ramanathan, m; zivadinov, r	effects of diet on brain iron levels among healthy individuals: an mri pilot study	neurobiology of aging	2015	10.1016/j.neurobiolaging.2015.01.010	0	NA	NA	NA	NA	NA_NA_NA_NA
torkildsen, o; brunborg, la; thorsen, f; mork, sj; stangel, m; myhr, km; bo, l	effects of dietary intervention on mri activity, de- and remyelination in the cuprizone model for demyelination	experimental neurology	2009	10.1016/j.expneurol.2008.09.026	9	1	a	a	a	1_a_a_a
torkildsen, o; brunborg, la; thorsen, f; mork, sj; stangel, m; myhr, km; bo, l	effects of dietary intervention on mri activity, de- and remyelination in the cuprizone model for demyelination	experimental neurology	2009	10.1016/j.expneurol.2008.09.026	9	1	a	a	NA	1_a_a_NA
torkildsen, o; brunborg, la; thorsen, f; mork, sj; stangel, m; myhr, km; bo, l	effects of dietary intervention on mri activity, de- and remyelination in the cuprizone model for demyelination	experimental neurology	2009	10.1016/j.expneurol.2008.09.026	9	1	a	NA	NA	1_a_NA_NA
torkildsen, o; brunborg, la; thorsen, f; mork, sj; stangel, m; myhr, km; bo, l	effects of dietary intervention on mri activity, de- and remyelination in the cuprizone model for demyelination	experimental neurology	2009	10.1016/j.expneurol.2008.09.026	9	1	NA	NA	NA	1_NA_NA_NA
fontana, l; ghezzi, l; cross, ah; piccio, l	effects of dietary restriction on neuroinflammation in neurodegenerative diseases	journal of experimental medicine	2021	10.1084/jem.20190086	0	1	b	b	NA	1_b_b_NA
fontana, l; ghezzi, l; cross, ah; piccio, l	effects of dietary restriction on neuroinflammation in neurodegenerative diseases	journal of experimental medicine	2021	10.1084/jem.20190086	0	1	b	NA	NA	1_b_NA_NA
fontana, l; ghezzi, l; cross, ah; piccio, l	effects of dietary restriction on neuroinflammation in neurodegenerative diseases	journal of experimental medicine	2021	10.1084/jem.20190086	0	1	NA	NA	NA	1_NA_NA_NA
yaqoob, p; calder, p	effects of dietary-lipid manipulation upon inflammatory mediator production by murine macrophages	cellular immunology	1995	10.1006/cimm.1995.1106	2	NA	NA	NA	NA	NA_NA_NA_NA
navarrete, c; garcia-martin, a; garrido-rodriguez, m; mestre, l; feliu, a; guaza, c; calzado, ma; munoz, e	effects of ehp-101 on inflammation and remyelination in murine models of multiple sclerosis	neurobiology of disease	2020	10.1016/j.nbd.2020.104994	0	NA	NA	NA	NA	NA_NA_NA_NA
mohamed, a; al-kafaji, g; almahroos, a; almosawi, z; alalwan, h; abdulla, r; alammadi, f; almubarak, a; al-mahrezi, a; kamal, a	effects of enhanced environment and induced depression on cuprizone mouse model of demyelination	experimental and therapeutic medicine	2019	10.3892/etm.2019.7654	2	2	a	NA	NA	2_a_NA_NA
mohamed, a; al-kafaji, g; almahroos, a; almosawi, z; alalwan, h; abdulla, r; alammadi, f; almubarak, a; al-mahrezi, a; kamal, a	effects of enhanced environment and induced depression on cuprizone mouse model of demyelination	experimental and therapeutic medicine	2019	10.3892/etm.2019.7654	2	2	NA	NA	NA	2_NA_NA_NA
dibiase, a; avellino, c; pieroni, f; quaresima, t; grisolia, a; cappa, m; salvati, s	effects of exogenous hexacosanoic acid on biochemical myelin composition in weaning and post-weaning rats	neurochemical research	1997	10.1023/a:1022451108063	0	NA	NA	NA	NA	NA_NA_NA_NA
schiffer, rb; baggs, rb; mcdermott, mp	effects of exposure to dietary nickel and zinc upon experimental allergic encephalomyelitis in swxj mice	journal of trace elements in experimental medicine	1996	10.1002/(sici)1520-670x(199607)9:1<1::aid-jtra1>3.0.co;2-r	0	NA	NA	NA	NA	NA_NA_NA_NA
calder, pc; costarosa, lfbp; curi, r	effects of feeding lipids of different fatty-acid compositions upon rat lymphocyte-proliferation	life sciences	1994	10.1016/0024-3205(94)00910-4	1	NA	NA	NA	NA	NA_NA_NA_NA
wada, r; koyama, m; mizukami, h; odaka, h; ikeda, h; yagihashi, s	effects of long-term treatment with alpha-glucosidase inhibitor on the peripheral nerve function and structure in goto-kakizaki rats: a genetic model for type 2 diabetes	diabetes-metabolism research and reviews	1999	10.1002/(sici)1520-7560(199909/10)15:5<332::aid-dmrr55>3.0.co;2-l	0	NA	NA	NA	NA	NA_NA_NA_NA
labunets, if; utko, na; toporova, ok	effects of multipotent mesenchymal stromal cells of the human umbilical cord and their combination with melatonin in adult and aging mice with a toxic cuprizone model of demyelination	advances in gerontology	2021	10.1134/s2079057021020077	0	2	a	NA	NA	2_a_NA_NA
labunets, if; utko, na; toporova, ok	effects of multipotent mesenchymal stromal cells of the human umbilical cord and their combination with melatonin in adult and aging mice with a toxic cuprizone model of demyelination	advances in gerontology	2021	10.1134/s2079057021020077	0	2	NA	NA	NA	2_NA_NA_NA
esteve, ir; wanden-berghe, c; sanz-valero, j	effects of nutritional status on the multiple sclerosis disease: systematic review	nutricion hospitalaria	2018	10.20960/nh.1229	1	1	a	b	NA	1_a_b_NA
esteve, ir; wanden-berghe, c; sanz-valero, j	effects of nutritional status on the multiple sclerosis disease: systematic review	nutricion hospitalaria	2018	10.20960/nh.1229	1	1	a	NA	NA	1_a_NA_NA
esteve, ir; wanden-berghe, c; sanz-valero, j	effects of nutritional status on the multiple sclerosis disease: systematic review	nutricion hospitalaria	2018	10.20960/nh.1229	1	1	NA	NA	NA	1_NA_NA_NA
selek, s; esrefoglu, m; meral, i; bulut, h; caglar, hg; sonuc, g; yildiz, c; teloglu, es; dogan, n; yuce, b; tiftik, e; bayindir, n	effects of oenothera biennis l. and hypericum perforatum l. extracts on some central nervous system myelin proteins, brain histopathology and oxidative stress in mice with experimental autoimmune encephalomyelitis	biotechnic & histochemistry	2019	10.1080/10520295.2018.1482001	0	1	a	a	b	1_a_a_b
selek, s; esrefoglu, m; meral, i; bulut, h; caglar, hg; sonuc, g; yildiz, c; teloglu, es; dogan, n; yuce, b; tiftik, e; bayindir, n	effects of oenothera biennis l. and hypericum perforatum l. extracts on some central nervous system myelin proteins, brain histopathology and oxidative stress in mice with experimental autoimmune encephalomyelitis	biotechnic & histochemistry	2019	10.1080/10520295.2018.1482001	0	1	a	a	NA	1_a_a_NA
selek, s; esrefoglu, m; meral, i; bulut, h; caglar, hg; sonuc, g; yildiz, c; teloglu, es; dogan, n; yuce, b; tiftik, e; bayindir, n	effects of oenothera biennis l. and hypericum perforatum l. extracts on some central nervous system myelin proteins, brain histopathology and oxidative stress in mice with experimental autoimmune encephalomyelitis	biotechnic & histochemistry	2019	10.1080/10520295.2018.1482001	0	1	a	NA	NA	1_a_NA_NA
selek, s; esrefoglu, m; meral, i; bulut, h; caglar, hg; sonuc, g; yildiz, c; teloglu, es; dogan, n; yuce, b; tiftik, e; bayindir, n	effects of oenothera biennis l. and hypericum perforatum l. extracts on some central nervous system myelin proteins, brain histopathology and oxidative stress in mice with experimental autoimmune encephalomyelitis	biotechnic & histochemistry	2019	10.1080/10520295.2018.1482001	0	1	NA	NA	NA	1_NA_NA_NA
takatori, r; vu, pl; iwamoto, t; satsu, h; totsuka, m; chida, k; shimizu, m	effects of oral administration of glucosylceramide on gene expression changes in hairless mouse skin: comparison of whole skin, epidermis, and dermis	bioscience biotechnology and biochemistry	2013	10.1271/bbb.130318	0	NA	NA	NA	NA	NA_NA_NA_NA
emon, st; irban, ag; bozkurt, su; akakin, d; konya, d; ozgen, s	effects of parenteral nutritional support with fish-oil emulsion on spinal cord recovery in rats with traumatic spinal cord injury	turkish neurosurgery	2011	NA	0	NA	NA	NA	NA	NA_NA_NA_NA
naghibzadeh, m; ranjbar, r; tabandeh, mr; habibi, a	effects of two training programs on transcriptional levels of neurotrophins and glial cells population in hippocampus of experimental multiple sclerosis	international journal of sports medicine	2018	10.1055/a-0608-4635	1	2	NA	NA	NA	2_NA_NA_NA
jeffery, nm; cortina, m; newsholme, ea; calder, pc	effects of variations in the proportions of saturated, monounsaturated and polyunsaturated fatty acids in the rat diet on spleen lymphocyte functions	british journal of nutrition	1997	10.1079/bjn19970077	0	NA	NA	NA	NA	NA_NA_NA_NA
lorenzoni, ag; ruiz-feria, ca	effects of vitamin e and l-arginine on cardiopulmonary function and ascites parameters in broiler chickens reared under subnormal temperatures	poultry science	2006	10.1093/ps/85.12.2241	0	NA	NA	NA	NA	NA_NA_NA_NA
moghaddami, m; mayrhofer, g; anderson, ph; morris, ha; van der hoek, m; cleland, lg	efficacy and mechanisms of action of vitamin d in experimental polyarthritis	immunology and cell biology	2012	10.1038/icb.2011.22	0	1	c	b	NA	1_c_b_NA
moghaddami, m; mayrhofer, g; anderson, ph; morris, ha; van der hoek, m; cleland, lg	efficacy and mechanisms of action of vitamin d in experimental polyarthritis	immunology and cell biology	2012	10.1038/icb.2011.22	0	1	c	NA	NA	1_c_NA_NA
moghaddami, m; mayrhofer, g; anderson, ph; morris, ha; van der hoek, m; cleland, lg	efficacy and mechanisms of action of vitamin d in experimental polyarthritis	immunology and cell biology	2012	10.1038/icb.2011.22	0	1	NA	NA	NA	1_NA_NA_NA
hongell, k; silva, dg; ritter, s; meier, dp; soilu-hanninen, m	efficacy and safety outcomes in vitamin d supplement users in the fingolimod phase 3 trials	journal of neurology	2018	10.1007/s00415-017-8697-3	0	1	c	a	NA	1_c_a_NA
hongell, k; silva, dg; ritter, s; meier, dp; soilu-hanninen, m	efficacy and safety outcomes in vitamin d supplement users in the fingolimod phase 3 trials	journal of neurology	2018	10.1007/s00415-017-8697-3	0	1	c	NA	NA	1_c_NA_NA
hongell, k; silva, dg; ritter, s; meier, dp; soilu-hanninen, m	efficacy and safety outcomes in vitamin d supplement users in the fingolimod phase 3 trials	journal of neurology	2018	10.1007/s00415-017-8697-3	0	1	NA	NA	NA	1_NA_NA_NA
farzaei, mh; shahpiri, z; bahramsoltani, r; nia, mm; najafi, f; rahimi, r	efficacy and tolerability of phytomedicines in multiple sclerosis patients: a review	cns drugs	2017	10.1007/s40263-017-0466-4	1	1	a	a	b	1_a_a_b
farzaei, mh; shahpiri, z; bahramsoltani, r; nia, mm; najafi, f; rahimi, r	efficacy and tolerability of phytomedicines in multiple sclerosis patients: a review	cns drugs	2017	10.1007/s40263-017-0466-4	1	1	a	a	NA	1_a_a_NA
farzaei, mh; shahpiri, z; bahramsoltani, r; nia, mm; najafi, f; rahimi, r	efficacy and tolerability of phytomedicines in multiple sclerosis patients: a review	cns drugs	2017	10.1007/s40263-017-0466-4	1	1	a	NA	NA	1_a_NA_NA
farzaei, mh; shahpiri, z; bahramsoltani, r; nia, mm; najafi, f; rahimi, r	efficacy and tolerability of phytomedicines in multiple sclerosis patients: a review	cns drugs	2017	10.1007/s40263-017-0466-4	1	1	NA	NA	NA	1_NA_NA_NA
unoda, k; doi, y; nakajima, h; yamane, k; hosokawa, t; ishida, s; kimura, f; hanafusa, t	eicosapentaenoic acid (epa) induces peroxisome proliferator-activated receptors and ameliorates experimental autoimmune encephalomyelitis	journal of neuroimmunology	2013	10.1016/j.jneuroim.2012.12.003	12	1	a	a	a	1_a_a_a
unoda, k; doi, y; nakajima, h; yamane, k; hosokawa, t; ishida, s; kimura, f; hanafusa, t	eicosapentaenoic acid (epa) induces peroxisome proliferator-activated receptors and ameliorates experimental autoimmune encephalomyelitis	journal of neuroimmunology	2013	10.1016/j.jneuroim.2012.12.003	12	1	a	a	NA	1_a_a_NA
unoda, k; doi, y; nakajima, h; yamane, k; hosokawa, t; ishida, s; kimura, f; hanafusa, t	eicosapentaenoic acid (epa) induces peroxisome proliferator-activated receptors and ameliorates experimental autoimmune encephalomyelitis	journal of neuroimmunology	2013	10.1016/j.jneuroim.2012.12.003	12	1	a	NA	NA	1_a_NA_NA
unoda, k; doi, y; nakajima, h; yamane, k; hosokawa, t; ishida, s; kimura, f; hanafusa, t	eicosapentaenoic acid (epa) induces peroxisome proliferator-activated receptors and ameliorates experimental autoimmune encephalomyelitis	journal of neuroimmunology	2013	10.1016/j.jneuroim.2012.12.003	12	1	NA	NA	NA	1_NA_NA_NA
di biase, a; salvati, s; di benedetto, r; attorri, l; martinelli, a; malchiodi, f	eicosapentaenoic acid pre-treatment reduces biochemical changes induced in total brain and myelin of weanling wistar rats by cuprizone feeding	prostaglandins leukotrienes and essential fatty acids	2014	10.1016/j.plefa.2013.11.004	1	2	a	NA	NA	2_a_NA_NA
di biase, a; salvati, s; di benedetto, r; attorri, l; martinelli, a; malchiodi, f	eicosapentaenoic acid pre-treatment reduces biochemical changes induced in total brain and myelin of weanling wistar rats by cuprizone feeding	prostaglandins leukotrienes and essential fatty acids	2014	10.1016/j.plefa.2013.11.004	1	2	NA	NA	NA	2_NA_NA_NA
wang, x; li, q; han, x; gong, mr; yu, z; xu, b	electroacupuncture alleviates diabetic peripheral neuropathy by regulating glycolipid-related glo/ages/rage axis	frontiers in endocrinology	2021	10.3389/fendo.2021.655591	0	NA	NA	NA	NA	NA_NA_NA_NA
sedlacek, m; schoolwerth, ac; remillard, bd	electrolyte disturbances in the intensive care unit	seminars in dialysis	2006	10.1111/j.1525-139x.2006.00212.x	0	NA	NA	NA	NA	NA_NA_NA_NA
rana, sv; chopra, js; mehta, s; chand, uk; sharma, u	electrophysiological and histopathological changes in peripheral-nerves of postnatally undernourished and rehabilitated young rhesus-monkeys	indian journal of experimental biology	1991	NA	0	NA	NA	NA	NA	NA_NA_NA_NA
sanadgol, n; golab, f; mostafaie, a; mehdizadeh, m; abdollahi, m; sharifzadeh, m; ravan, h	ellagic acid ameliorates cuprizone-induced acute cns inflammation via restriction of microgliosis and down-regulation of ccl2 and ccl3 pro-inflammatory chemokines	cellular and molecular biology	2016	10.14715/cmb/2016.62.12.5	0	2	a	NA	NA	2_a_NA_NA
sanadgol, n; golab, f; mostafaie, a; mehdizadeh, m; abdollahi, m; sharifzadeh, m; ravan, h	ellagic acid ameliorates cuprizone-induced acute cns inflammation via restriction of microgliosis and down-regulation of ccl2 and ccl3 pro-inflammatory chemokines	cellular and molecular biology	2016	10.14715/cmb/2016.62.12.5	0	2	NA	NA	NA	2_NA_NA_NA
khodaei, f; rashedinia, m; heidari, r; rezaei, m; khoshnoud, mj	ellagic acid improves muscle dysfunction in cuprizone-induced demyelinated mice via mitochondrial sirt3 regulation	life sciences	2019	10.1016/j.lfs.2019.116954	0	2	a	NA	NA	2_a_NA_NA
khodaei, f; rashedinia, m; heidari, r; rezaei, m; khoshnoud, mj	ellagic acid improves muscle dysfunction in cuprizone-induced demyelinated mice via mitochondrial sirt3 regulation	life sciences	2019	10.1016/j.lfs.2019.116954	0	2	NA	NA	NA	2_NA_NA_NA
glenn, jd; mowry, em	emerging concepts on the gut microbiome and multiple sclerosis	journal of interferon and cytokine research	2016	10.1089/jir.2015.0177	5	1	b	a	NA	1_b_a_NA
glenn, jd; mowry, em	emerging concepts on the gut microbiome and multiple sclerosis	journal of interferon and cytokine research	2016	10.1089/jir.2015.0177	5	1	b	NA	NA	1_b_NA_NA
glenn, jd; mowry, em	emerging concepts on the gut microbiome and multiple sclerosis	journal of interferon and cytokine research	2016	10.1089/jir.2015.0177	5	1	NA	NA	NA	1_NA_NA_NA
janakiraman, m; krishnamoorthy, g	emerging role of diet and microbiota interactions in neuroinflammation	frontiers in immunology	2018	10.3389/fimmu.2018.02067	3	1	b	a	NA	1_b_a_NA
janakiraman, m; krishnamoorthy, g	emerging role of diet and microbiota interactions in neuroinflammation	frontiers in immunology	2018	10.3389/fimmu.2018.02067	3	1	b	NA	NA	1_b_NA_NA
janakiraman, m; krishnamoorthy, g	emerging role of diet and microbiota interactions in neuroinflammation	frontiers in immunology	2018	10.3389/fimmu.2018.02067	3	1	NA	NA	NA	1_NA_NA_NA
wang, xq; ali, n; lin, cig	emerging role of glutamate in the pathophysiology and therapeutics of gulf war illness	life sciences	2021	10.1016/j.lfs.2021.119609	0	NA	NA	NA	NA	NA_NA_NA_NA
girard, s; bruckert, e; turpin, g	endocrine disease in adrenoleukodystrophy	annales de medecine interne	2001	NA	0	NA	NA	NA	NA	NA_NA_NA_NA
armstrong, rc; le, tq; flint, nc; vana, ac; zhou, yx	endogenous cell repair of chronic demyelination	journal of neuropathology and experimental neurology	2006	10.1097/01.jnen.0000205142.08716.7e	10	2	a	NA	NA	2_a_NA_NA
armstrong, rc; le, tq; flint, nc; vana, ac; zhou, yx	endogenous cell repair of chronic demyelination	journal of neuropathology and experimental neurology	2006	10.1097/01.jnen.0000205142.08716.7e	10	2	NA	NA	NA	2_NA_NA_NA
maiuolo, j; muscoli, c; gliozzi, m; musolino, v; carresi, c; paone, s; ilari, s; mollace, r; palma, e; mollace, v	endothelial dysfunction and extra-articular neurological manifestations in rheumatoid arthritis	biomolecules	2021	10.3390/biom11010081	0	NA	NA	NA	NA	NA_NA_NA_NA
bittner, s; ruck, t; schuhmann, mk; herrmann, am; maati, hmo; bobak, n; gobel, k; langhauser, f; stegner, d; ehling, p; borsotto, m; pape, hc; nieswandt, b; kleinschnitz, c; heurteaux, c; galla, hj; budde, t; wiendl, h; meuth, sg	endothelial twik-related potassium channel-1 (trek 1) regulates immune-cell trafficking into the cns	nature medicine	2013	10.1038/nm.3303	2	NA	NA	NA	NA	NA_NA_NA_NA
kaushik, dk; bhattacharya, a; mirzaei, r; rawji, ks; ahn, y; rho, jm; yong, vw	enhanced glycolytic metabolism supports transmigration of brain-infiltrating macrophages in multiple sclerosis	journal of clinical investigation	2019	10.1172/jci124012	0	1	b	b	NA	1_b_b_NA
kaushik, dk; bhattacharya, a; mirzaei, r; rawji, ks; ahn, y; rho, jm; yong, vw	enhanced glycolytic metabolism supports transmigration of brain-infiltrating macrophages in multiple sclerosis	journal of clinical investigation	2019	10.1172/jci124012	0	1	b	NA	NA	1_b_NA_NA
kaushik, dk; bhattacharya, a; mirzaei, r; rawji, ks; ahn, y; rho, jm; yong, vw	enhanced glycolytic metabolism supports transmigration of brain-infiltrating macrophages in multiple sclerosis	journal of clinical investigation	2019	10.1172/jci124012	0	1	NA	NA	NA	1_NA_NA_NA
fernandez-carbonell, c; charvet, le; krupp, lb	enhancing mood, cognition, and quality of life in pediatric multiple sclerosis	pediatric drugs	2021	10.1007/s40272-021-00451-5	0	1	a	a	a	1_a_a_a
fernandez-carbonell, c; charvet, le; krupp, lb	enhancing mood, cognition, and quality of life in pediatric multiple sclerosis	pediatric drugs	2021	10.1007/s40272-021-00451-5	0	1	a	a	NA	1_a_a_NA
fernandez-carbonell, c; charvet, le; krupp, lb	enhancing mood, cognition, and quality of life in pediatric multiple sclerosis	pediatric drugs	2021	10.1007/s40272-021-00451-5	0	1	a	NA	NA	1_a_NA_NA
fernandez-carbonell, c; charvet, le; krupp, lb	enhancing mood, cognition, and quality of life in pediatric multiple sclerosis	pediatric drugs	2021	10.1007/s40272-021-00451-5	0	1	NA	NA	NA	1_NA_NA_NA
romero, fb; martinez, jja; lopez, vl; martin, ig	enteral nutrition in neurological patients; is there enough vitamin d content in commonly used formulas?	nutricion hospitalaria	2012	10.3305/nh.2012.27.2.5647	1	1	c	a	NA	1_c_a_NA
romero, fb; martinez, jja; lopez, vl; martin, ig	enteral nutrition in neurological patients; is there enough vitamin d content in commonly used formulas?	nutricion hospitalaria	2012	10.3305/nh.2012.27.2.5647	1	1	c	NA	NA	1_c_NA_NA
romero, fb; martinez, jja; lopez, vl; martin, ig	enteral nutrition in neurological patients; is there enough vitamin d content in commonly used formulas?	nutricion hospitalaria	2012	10.3305/nh.2012.27.2.5647	1	1	NA	NA	NA	1_NA_NA_NA
moghadasi, an	environmental and genetic risk factors in the development of neuromyelitis optica	expert review of ophthalmology	2020	10.1080/17469899.2020.1723416	2	NA	NA	NA	NA	NA_NA_NA_NA
lauer, k	environmental associations with the risk of multiple-sclerosis - the contribution of ecological-studies	acta neurologica scandinavica	1995	10.1111/j.1600-0404.1995.tb05861.x	15	1	a	b	NA	1_a_b_NA
lauer, k	environmental associations with the risk of multiple-sclerosis - the contribution of ecological-studies	acta neurologica scandinavica	1995	10.1111/j.1600-0404.1995.tb05861.x	15	1	a	NA	NA	1_a_NA_NA
lauer, k	environmental associations with the risk of multiple-sclerosis - the contribution of ecological-studies	acta neurologica scandinavica	1995	10.1111/j.1600-0404.1995.tb05861.x	15	1	NA	NA	NA	1_NA_NA_NA
rothhammer, v; quintana, fj	environmental control of autoimmune inflammation in the central nervous system	current opinion in immunology	2016	10.1016/j.coi.2016.09.002	5	1	b	a	NA	1_b_a_NA
rothhammer, v; quintana, fj	environmental control of autoimmune inflammation in the central nervous system	current opinion in immunology	2016	10.1016/j.coi.2016.09.002	5	1	b	NA	NA	1_b_NA_NA
rothhammer, v; quintana, fj	environmental control of autoimmune inflammation in the central nervous system	current opinion in immunology	2016	10.1016/j.coi.2016.09.002	5	1	NA	NA	NA	1_NA_NA_NA
pusic, km; pusic, ad; kraig, rp	environmental enrichment stimulates immune cell secretion of exosomes that promote cns myelination and may regulate inflammation	cellular and molecular neurobiology	2016	10.1007/s10571-015-0269-4	0	NA	NA	NA	NA	NA_NA_NA_NA
al wutayd, o; mohamed, ag; saeedi, j; al otaibi, h; al jumah, m	environmental exposures and the risk of multiple sclerosis in saudi arabia	bmc neurology	2018	10.1186/s12883-018-1090-8	2	1	NA	NA	NA	1_NA_NA_NA
mandia, d; ferraro, oe; nosari, g; montomoli, c; zardini, e; bergamaschi, r	environmental factors and multiple sclerosis severity: a descriptive study	international journal of environmental research and public health	2014	10.3390/ijerph110606417	11	1	a	a	a	1_a_a_a
mandia, d; ferraro, oe; nosari, g; montomoli, c; zardini, e; bergamaschi, r	environmental factors and multiple sclerosis severity: a descriptive study	international journal of environmental research and public health	2014	10.3390/ijerph110606417	11	1	a	a	NA	1_a_a_NA
mandia, d; ferraro, oe; nosari, g; montomoli, c; zardini, e; bergamaschi, r	environmental factors and multiple sclerosis severity: a descriptive study	international journal of environmental research and public health	2014	10.3390/ijerph110606417	11	1	a	NA	NA	1_a_NA_NA
mandia, d; ferraro, oe; nosari, g; montomoli, c; zardini, e; bergamaschi, r	environmental factors and multiple sclerosis severity: a descriptive study	international journal of environmental research and public health	2014	10.3390/ijerph110606417	11	1	NA	NA	NA	1_NA_NA_NA
jorg, s; grohme, da; erzler, m; binsfeld, m; haghikia, a; muller, dn; linker, ra; kleinewietfeld, m	environmental factors in autoimmune diseases and their role in multiple sclerosis	cellular and molecular life sciences	2016	10.1007/s00018-016-2311-1	8	1	b	a	NA	1_b_a_NA
jorg, s; grohme, da; erzler, m; binsfeld, m; haghikia, a; muller, dn; linker, ra; kleinewietfeld, m	environmental factors in autoimmune diseases and their role in multiple sclerosis	cellular and molecular life sciences	2016	10.1007/s00018-016-2311-1	8	1	b	NA	NA	1_b_NA_NA
jorg, s; grohme, da; erzler, m; binsfeld, m; haghikia, a; muller, dn; linker, ra; kleinewietfeld, m	environmental factors in autoimmune diseases and their role in multiple sclerosis	cellular and molecular life sciences	2016	10.1007/s00018-016-2311-1	8	1	NA	NA	NA	1_NA_NA_NA
ascherio, a	environmental factors in multiple sclerosis	expert review of neurotherapeutics	2013	10.1586/14737175.2013.865866	12	1	b	d	NA	1_b_d_NA
ascherio, a	environmental factors in multiple sclerosis	expert review of neurotherapeutics	2013	10.1586/14737175.2013.865866	12	1	b	NA	NA	1_b_NA_NA
ascherio, a	environmental factors in multiple sclerosis	expert review of neurotherapeutics	2013	10.1586/14737175.2013.865866	12	1	NA	NA	NA	1_NA_NA_NA
michel, l	environmental factors in the development of multiple sclerosis	revue neurologique	2018	10.1016/j.neurol.2018.03.010	0	1	c	a	NA	1_c_a_NA
michel, l	environmental factors in the development of multiple sclerosis	revue neurologique	2018	10.1016/j.neurol.2018.03.010	0	1	c	NA	NA	1_c_NA_NA
michel, l	environmental factors in the development of multiple sclerosis	revue neurologique	2018	10.1016/j.neurol.2018.03.010	0	1	NA	NA	NA	1_NA_NA_NA
malli, c; pandit, l; d'cunha, a; mustafa, s	environmental factors related to multiple sclerosis in indian population	plos one	2015	10.1371/journal.pone.0124064	1	3	NA	NA	NA	3_NA_NA_NA
amato, mp; derfuss, t; hemmer, b; liblau, r; montalban, x; sorensen, ps; miller, dh	environmental modifiable risk factors for multiple sclerosis: report from the 2016 ectrims focused workshop	multiple sclerosis journal	2018	10.1177/1352458516686847	9	1	a	a	b	1_a_a_b
amato, mp; derfuss, t; hemmer, b; liblau, r; montalban, x; sorensen, ps; miller, dh	environmental modifiable risk factors for multiple sclerosis: report from the 2016 ectrims focused workshop	multiple sclerosis journal	2018	10.1177/1352458516686847	9	1	a	a	NA	1_a_a_NA
amato, mp; derfuss, t; hemmer, b; liblau, r; montalban, x; sorensen, ps; miller, dh	environmental modifiable risk factors for multiple sclerosis: report from the 2016 ectrims focused workshop	multiple sclerosis journal	2018	10.1177/1352458516686847	9	1	a	NA	NA	1_a_NA_NA
amato, mp; derfuss, t; hemmer, b; liblau, r; montalban, x; sorensen, ps; miller, dh	environmental modifiable risk factors for multiple sclerosis: report from the 2016 ectrims focused workshop	multiple sclerosis journal	2018	10.1177/1352458516686847	9	1	NA	NA	NA	1_NA_NA_NA
ascherio, a; munger, kl	environmental risk factors for multiple sclerosis. part ii: noninfectious factors	annals of neurology	2007	10.1002/ana.21141	35	1	a	a	a	1_a_a_a
ascherio, a; munger, kl	environmental risk factors for multiple sclerosis. part ii: noninfectious factors	annals of neurology	2007	10.1002/ana.21141	35	1	a	a	NA	1_a_a_NA
ascherio, a; munger, kl	environmental risk factors for multiple sclerosis. part ii: noninfectious factors	annals of neurology	2007	10.1002/ana.21141	35	1	a	NA	NA	1_a_NA_NA
ascherio, a; munger, kl	environmental risk factors for multiple sclerosis. part ii: noninfectious factors	annals of neurology	2007	10.1002/ana.21141	35	1	NA	NA	NA	1_NA_NA_NA
dehghan, m; ghaedi-heidari, f	environmental risk factors for multiple sclerosis: a case-control study in kerman, iran	iranian journal of nursing and midwifery research	2018	10.4103/ijnmr.ijnmr_192_17	0	1	a	b	NA	1_a_b_NA
dehghan, m; ghaedi-heidari, f	environmental risk factors for multiple sclerosis: a case-control study in kerman, iran	iranian journal of nursing and midwifery research	2018	10.4103/ijnmr.ijnmr_192_17	0	1	a	NA	NA	1_a_NA_NA
dehghan, m; ghaedi-heidari, f	environmental risk factors for multiple sclerosis: a case-control study in kerman, iran	iranian journal of nursing and midwifery research	2018	10.4103/ijnmr.ijnmr_192_17	0	1	NA	NA	NA	1_NA_NA_NA
carbonnel, f; jantchou, p; monnet, e; cosnes, j	environmental risk factors in crohn's disease and ulcerative colitis: an update	gastroenterologie clinique et biologique	2009	10.1016/s0399-8320(09)73150-1	0	NA	NA	NA	NA	NA_NA_NA_NA
gusev, e; boiko, a; lauer, k; riise, t; deomina, t	environmental risk factors in ms: a case-control study in moscow	acta neurologica scandinavica	1996	10.1111/j.1600-0404.1996.tb00050.x	20	1	a	b	NA	1_a_b_NA
gusev, e; boiko, a; lauer, k; riise, t; deomina, t	environmental risk factors in ms: a case-control study in moscow	acta neurologica scandinavica	1996	10.1111/j.1600-0404.1996.tb00050.x	20	1	a	NA	NA	1_a_NA_NA
gusev, e; boiko, a; lauer, k; riise, t; deomina, t	environmental risk factors in ms: a case-control study in moscow	acta neurologica scandinavica	1996	10.1111/j.1600-0404.1996.tb00050.x	20	1	NA	NA	NA	1_NA_NA_NA
lauer, k	environmental risk factors in multiple sclerosis	expert review of neurotherapeutics	2010	10.1586/ern.10.7	10	1	a	b	NA	1_a_b_NA
lauer, k	environmental risk factors in multiple sclerosis	expert review of neurotherapeutics	2010	10.1586/ern.10.7	10	1	a	NA	NA	1_a_NA_NA
lauer, k	environmental risk factors in multiple sclerosis	expert review of neurotherapeutics	2010	10.1586/ern.10.7	10	1	NA	NA	NA	1_NA_NA_NA
marrie, ra	environmental risk factors in multiple sclerosis aetiology	lancet neurology	2004	10.1016/s1474-4422(04)00933-0	13	1	a	a	b	1_a_a_b
marrie, ra	environmental risk factors in multiple sclerosis aetiology	lancet neurology	2004	10.1016/s1474-4422(04)00933-0	13	1	a	a	NA	1_a_a_NA
marrie, ra	environmental risk factors in multiple sclerosis aetiology	lancet neurology	2004	10.1016/s1474-4422(04)00933-0	13	1	a	NA	NA	1_a_NA_NA
marrie, ra	environmental risk factors in multiple sclerosis aetiology	lancet neurology	2004	10.1016/s1474-4422(04)00933-0	13	1	NA	NA	NA	1_NA_NA_NA
hodjat, m; rahmani, s; khan, f; niaz, k; navaei-nigjeh, m; nejad, sm; abdollahi, m	environmental toxicants, incidence of degenerative diseases, and therapies from the epigenetic point of view	archives of toxicology	2017	10.1007/s00204-017-1979-9	0	NA	NA	NA	NA	NA_NA_NA_NA
farkkila, m; tiainen, t; koskiniemi, m	epidemiology and prognosis of acute myelitis in southern finland	journal of the neurological sciences	1997	10.1016/s0022-510x(97)00160-3	0	NA	NA	NA	NA	NA_NA_NA_NA
hagan, ka; munger, kl; ascherio, a; grodstein, f	epidemiology of major neurodegenerative diseases in women: contribution of the nurses' health study	american journal of public health	2016	10.2105/ajph.2016.303324	4	1	a	a	b	1_a_a_b
hagan, ka; munger, kl; ascherio, a; grodstein, f	epidemiology of major neurodegenerative diseases in women: contribution of the nurses' health study	american journal of public health	2016	10.2105/ajph.2016.303324	4	1	a	a	NA	1_a_a_NA
hagan, ka; munger, kl; ascherio, a; grodstein, f	epidemiology of major neurodegenerative diseases in women: contribution of the nurses' health study	american journal of public health	2016	10.2105/ajph.2016.303324	4	1	a	NA	NA	1_a_NA_NA
hagan, ka; munger, kl; ascherio, a; grodstein, f	epidemiology of major neurodegenerative diseases in women: contribution of the nurses' health study	american journal of public health	2016	10.2105/ajph.2016.303324	4	1	NA	NA	NA	1_NA_NA_NA
wang, jp; ren, zh; xu, ym; xiao, s; meydani, sn; wu, dy	epigallocatechin-3-gallate ameliorates experimental autoimmune encephalomyelitis by altering balance among cd4(+) t-cell subsets	american journal of pathology	2012	10.1016/j.ajpath.2011.09.007	3	1	NA	NA	NA	1_NA_NA_NA
skinner, mk; manikkam, m; guerrero-bosagna, c	epigenetic transgenerational actions of environmental factors in disease etiology	trends in endocrinology and metabolism	2010	10.1016/j.tem.2009.12.007	0	NA	NA	NA	NA	NA_NA_NA_NA
mason, jl; langaman, c; morell, p; suzuki, k; matsushima, gk	episodic demyelination and subsequent remyelination within the murine central nervous system: changes in axonal calibre	neuropathology and applied neurobiology	2001	10.1046/j.0305-1846.2001.00301.x	13	2	a	NA	NA	2_a_NA_NA
mason, jl; langaman, c; morell, p; suzuki, k; matsushima, gk	episodic demyelination and subsequent remyelination within the murine central nervous system: changes in axonal calibre	neuropathology and applied neurobiology	2001	10.1046/j.0305-1846.2001.00301.x	13	2	NA	NA	NA	2_NA_NA_NA
kerr, jr	epstein-barr virus (ebv) reactivation and therapeutic inhibitors	journal of clinical pathology	2019	10.1136/jclinpath-2019-205822	0	NA	NA	NA	NA	NA_NA_NA_NA
rencz, f; gulacsi, l; drummond, m; golicki, d; rupel, vp; simon, j; stolk, ea; brodszky, v; baji, p; zavada, j; petrova, g; rotar, a; pentek, m	eq-5d in central and eastern europe: 2000-2015	quality of life research	2016	10.1007/s11136-016-1375-6	1	NA	NA	NA	NA	NA_NA_NA_NA
altinoz, ma; ozpinar, a; ozpinar, a; hacker, e	erucic acid, a nutritional ppar delta-ligand may influence huntington's disease pathogenesis	metabolic brain disease	2020	10.1007/s11011-019-00500-6	0	NA	NA	NA	NA	NA_NA_NA_NA
koch, m; ramsaransing, gsm; fokkema, mr; heersema, dj; de keyser, j	erythrocyte membrane fatty acids in benign and progressive forms of multiple sclerosis	journal of the neurological sciences	2006	10.1016/j.jns.2006.01.010	1	1	a	a	a	1_a_a_a
koch, m; ramsaransing, gsm; fokkema, mr; heersema, dj; de keyser, j	erythrocyte membrane fatty acids in benign and progressive forms of multiple sclerosis	journal of the neurological sciences	2006	10.1016/j.jns.2006.01.010	1	1	a	a	NA	1_a_a_NA
koch, m; ramsaransing, gsm; fokkema, mr; heersema, dj; de keyser, j	erythrocyte membrane fatty acids in benign and progressive forms of multiple sclerosis	journal of the neurological sciences	2006	10.1016/j.jns.2006.01.010	1	1	a	NA	NA	1_a_NA_NA
koch, m; ramsaransing, gsm; fokkema, mr; heersema, dj; de keyser, j	erythrocyte membrane fatty acids in benign and progressive forms of multiple sclerosis	journal of the neurological sciences	2006	10.1016/j.jns.2006.01.010	1	1	NA	NA	NA	1_NA_NA_NA
rezapour-firouzi, s; arefhosseini, sr; ebrahimi-mamaghani, m; farhoudi, m; baradaran, b; ali, tm; zamani, f	erythrocyte membrane fatty acids in multiple sclerosis patients and hot-nature dietary intervention with co-supplemented hemp-seed and evening-primrose oils	african journal of traditional complementary and alternative medicines	2013	10.4314/ajtcam.v10i6.22	5	1	a	a	b	1_a_a_b
rezapour-firouzi, s; arefhosseini, sr; ebrahimi-mamaghani, m; farhoudi, m; baradaran, b; ali, tm; zamani, f	erythrocyte membrane fatty acids in multiple sclerosis patients and hot-nature dietary intervention with co-supplemented hemp-seed and evening-primrose oils	african journal of traditional complementary and alternative medicines	2013	10.4314/ajtcam.v10i6.22	5	1	a	a	NA	1_a_a_NA
rezapour-firouzi, s; arefhosseini, sr; ebrahimi-mamaghani, m; farhoudi, m; baradaran, b; ali, tm; zamani, f	erythrocyte membrane fatty acids in multiple sclerosis patients and hot-nature dietary intervention with co-supplemented hemp-seed and evening-primrose oils	african journal of traditional complementary and alternative medicines	2013	10.4314/ajtcam.v10i6.22	5	1	a	NA	NA	1_a_NA_NA
rezapour-firouzi, s; arefhosseini, sr; ebrahimi-mamaghani, m; farhoudi, m; baradaran, b; ali, tm; zamani, f	erythrocyte membrane fatty acids in multiple sclerosis patients and hot-nature dietary intervention with co-supplemented hemp-seed and evening-primrose oils	african journal of traditional complementary and alternative medicines	2013	10.4314/ajtcam.v10i6.22	5	1	NA	NA	NA	1_NA_NA_NA
burgos, r; breton, i; cereda, e; desport, jc; dziewas, r; genton, l; gomes, f; jesus, p; leischker, a; muscaritoli, m; poulia, ka; preiser, jc; van der marck, m; wirth, r; singer, p; bischoff, sc	espen guideline clinical nutrition in neurology	clinical nutrition	2018	10.1016/j.clnu.2017.09.003	7	4	NA	NA	NA	4_NA_NA_NA
catani, mv; gasperi, v; bisogno, t; maccarrone, m	essential dietary bioactive lipids in neuroinflammatory diseases	antioxidants & redox signaling	2018	10.1089/ars.2016.6958	0	1	a	a	b	1_a_a_b
catani, mv; gasperi, v; bisogno, t; maccarrone, m	essential dietary bioactive lipids in neuroinflammatory diseases	antioxidants & redox signaling	2018	10.1089/ars.2016.6958	0	1	a	a	NA	1_a_a_NA
catani, mv; gasperi, v; bisogno, t; maccarrone, m	essential dietary bioactive lipids in neuroinflammatory diseases	antioxidants & redox signaling	2018	10.1089/ars.2016.6958	0	1	a	NA	NA	1_a_NA_NA
catani, mv; gasperi, v; bisogno, t; maccarrone, m	essential dietary bioactive lipids in neuroinflammatory diseases	antioxidants & redox signaling	2018	10.1089/ars.2016.6958	0	1	NA	NA	NA	1_NA_NA_NA
mayer, m; svitakova, v	essential fatty acids and multiple sclerosis	ceska a slovenska neurologie a neurochirurgie	1998	NA	0	1	a	b	NA	1_a_b_NA
mayer, m; svitakova, v	essential fatty acids and multiple sclerosis	ceska a slovenska neurologie a neurochirurgie	1998	NA	0	1	a	NA	NA	1_a_NA_NA
mayer, m; svitakova, v	essential fatty acids and multiple sclerosis	ceska a slovenska neurologie a neurochirurgie	1998	NA	0	1	NA	NA	NA	1_NA_NA_NA
mayer, m	essential fatty acids and related molecular and cellular mechanisms in multiple sclerosis: new looks at old concepts	folia biologica	1999	NA	0	1	a	b	NA	1_a_b_NA
mayer, m	essential fatty acids and related molecular and cellular mechanisms in multiple sclerosis: new looks at old concepts	folia biologica	1999	NA	0	1	a	NA	NA	1_a_NA_NA
mayer, m	essential fatty acids and related molecular and cellular mechanisms in multiple sclerosis: new looks at old concepts	folia biologica	1999	NA	0	1	NA	NA	NA	1_NA_NA_NA
grant, wb; cross, hs; garland, cf; gorham, ed; moan, j; peterlik, m; porojnicu, ac; reichrath, j; zittermann, a	estimated benefit of increased vitamin d status in reducing the economic burden of disease in western europe	progress in biophysics & molecular biology	2009	10.1016/j.pbiomolbio.2009.02.003	3	1	c	NA	NA	1_c_NA_NA
grant, wb; cross, hs; garland, cf; gorham, ed; moan, j; peterlik, m; porojnicu, ac; reichrath, j; zittermann, a	estimated benefit of increased vitamin d status in reducing the economic burden of disease in western europe	progress in biophysics & molecular biology	2009	10.1016/j.pbiomolbio.2009.02.003	3	1	NA	NA	NA	1_NA_NA_NA
karayigit, mo; yarim, m	estrogen and progesterone synthesis with cellular response in a c57bl/6 mouse model of cuprizone-lnduced demyelination	acta scientiae veterinariae	2018	10.22456/1679-9216.82555	0	2	a	NA	NA	2_a_NA_NA
karayigit, mo; yarim, m	estrogen and progesterone synthesis with cellular response in a c57bl/6 mouse model of cuprizone-lnduced demyelination	acta scientiae veterinariae	2018	10.22456/1679-9216.82555	0	2	NA	NA	NA	2_NA_NA_NA
salvati, s; di biase, a; attorri, l; di benedetto, r; sanchez, m; lorenzini, l; alessandri, m; calza, l	ethyl-eicosapentaenoic acid ameliorates the clinical course of experimental allergic encephalomyelitis induced in dark agouti rats	journal of nutritional biochemistry	2013	10.1016/j.jnutbio.2013.02.005	7	1	a	a	a	1_a_a_a
salvati, s; di biase, a; attorri, l; di benedetto, r; sanchez, m; lorenzini, l; alessandri, m; calza, l	ethyl-eicosapentaenoic acid ameliorates the clinical course of experimental allergic encephalomyelitis induced in dark agouti rats	journal of nutritional biochemistry	2013	10.1016/j.jnutbio.2013.02.005	7	1	a	a	NA	1_a_a_NA
salvati, s; di biase, a; attorri, l; di benedetto, r; sanchez, m; lorenzini, l; alessandri, m; calza, l	ethyl-eicosapentaenoic acid ameliorates the clinical course of experimental allergic encephalomyelitis induced in dark agouti rats	journal of nutritional biochemistry	2013	10.1016/j.jnutbio.2013.02.005	7	1	a	NA	NA	1_a_NA_NA
salvati, s; di biase, a; attorri, l; di benedetto, r; sanchez, m; lorenzini, l; alessandri, m; calza, l	ethyl-eicosapentaenoic acid ameliorates the clinical course of experimental allergic encephalomyelitis induced in dark agouti rats	journal of nutritional biochemistry	2013	10.1016/j.jnutbio.2013.02.005	7	1	NA	NA	NA	1_NA_NA_NA
tredinnick, ar; probst, yc	evaluating the effects of dietary interventions on disease progression and symptoms of adults with multiple sclerosis: an umbrella review	advances in nutrition	2020	10.1093/advances/nmaa063	1	1	a	a	a	1_a_a_a
tredinnick, ar; probst, yc	evaluating the effects of dietary interventions on disease progression and symptoms of adults with multiple sclerosis: an umbrella review	advances in nutrition	2020	10.1093/advances/nmaa063	1	1	a	a	NA	1_a_a_NA
tredinnick, ar; probst, yc	evaluating the effects of dietary interventions on disease progression and symptoms of adults with multiple sclerosis: an umbrella review	advances in nutrition	2020	10.1093/advances/nmaa063	1	1	a	NA	NA	1_a_NA_NA
tredinnick, ar; probst, yc	evaluating the effects of dietary interventions on disease progression and symptoms of adults with multiple sclerosis: an umbrella review	advances in nutrition	2020	10.1093/advances/nmaa063	1	1	NA	NA	NA	1_NA_NA_NA
mattner, f; bandin, dl; staykova, m; berghofer, p; gregoire, mc; ballantyne, p; quinlivan, m; fordham, s; pham, t; willenborg, do; katsifis, a	evaluation of [i-123]-clinde as a potent spect radiotracer to assess the degree of astroglia activation in cuprizone-induced neuroinflammation	european journal of nuclear medicine and molecular imaging	2011	10.1007/s00259-011-1784-2	0	2	NA	NA	NA	2_NA_NA_NA
doidge, mj	evaluation of a nutrition education-program for people with multiple-sclerosis	journal of human nutrition and dietetics	1993	10.1111/j.1365-277x.1993.tb00357.x	0	NA	NA	NA	NA	NA_NA_NA_NA
mohammadi-rad, m; ghasemi, n; aliomrani, m	evaluation of apamin effects on myelination process in c57bl/6 mice model of multiple sclerosis	research in pharmaceutical sciences	2019	10.4103/1735-5362.268203	2	2	a	NA	NA	2_a_NA_NA
mohammadi-rad, m; ghasemi, n; aliomrani, m	evaluation of apamin effects on myelination process in c57bl/6 mice model of multiple sclerosis	research in pharmaceutical sciences	2019	10.4103/1735-5362.268203	2	2	NA	NA	NA	2_NA_NA_NA
zalewski, nl; flanagan, ep; keegan, bm	evaluation of idiopathic transverse myelitis revealing specific myelopathy diagnoses	neurology	2018	10.1212/wnl.0000000000004796	0	NA	NA	NA	NA	NA_NA_NA_NA
li, f; liu, yw; wang, xf; liu, gw	evaluation of malnutrition in patients with nervous system disease	expert review of neurotherapeutics	2014	10.1586/14737175.2014.957184	0	1	a	b	NA	1_a_b_NA
li, f; liu, yw; wang, xf; liu, gw	evaluation of malnutrition in patients with nervous system disease	expert review of neurotherapeutics	2014	10.1586/14737175.2014.957184	0	1	a	NA	NA	1_a_NA_NA
li, f; liu, yw; wang, xf; liu, gw	evaluation of malnutrition in patients with nervous system disease	expert review of neurotherapeutics	2014	10.1586/14737175.2014.957184	0	1	NA	NA	NA	1_NA_NA_NA
mitra, n; xuan, k; teo, c; xian-zhuang, n; singh, a; chellian, j	evaluation of neuroprotective effects of alpha-tocopherol in cuprizone-induced demyelination model of multiple sclerosis	research in pharmaceutical sciences	2020	10.4103/1735-5362.301345	0	2	a	NA	NA	2_a_NA_NA
mitra, n; xuan, k; teo, c; xian-zhuang, n; singh, a; chellian, j	evaluation of neuroprotective effects of alpha-tocopherol in cuprizone-induced demyelination model of multiple sclerosis	research in pharmaceutical sciences	2020	10.4103/1735-5362.301345	0	2	NA	NA	NA	2_NA_NA_NA
bouhrara, m; khattar, n; elango, p; resnick, sm; ferrucci, l; spencer, rg	evidence of association between obesity and lower cerebral myelin content in cognitively unimpaired adults	international journal of obesity	2021	10.1038/s41366-021-00749-x	0	NA	NA	NA	NA	NA_NA_NA_NA
bond, gj; mazariegos, gv; sindhi, r; abu-elmagd, km; reyes, j	evolutionary experience with immunosuppression in pediatric intestinal transplantation	journal of pediatric surgery	2005	10.1016/j.jpedsurg.2004.09.020	0	NA	NA	NA	NA	NA_NA_NA_NA
straub, rh; cutolo, m; pacifici, r	evolutionary medicine and bone loss in chronic inflammatory diseases-a theory of inflammation-related osteopenia	seminars in arthritis and rheumatism	2015	10.1016/j.semarthrit.2015.04.014	0	1	a	b	NA	1_a_b_NA
straub, rh; cutolo, m; pacifici, r	evolutionary medicine and bone loss in chronic inflammatory diseases-a theory of inflammation-related osteopenia	seminars in arthritis and rheumatism	2015	10.1016/j.semarthrit.2015.04.014	0	1	a	NA	NA	1_a_NA_NA
straub, rh; cutolo, m; pacifici, r	evolutionary medicine and bone loss in chronic inflammatory diseases-a theory of inflammation-related osteopenia	seminars in arthritis and rheumatism	2015	10.1016/j.semarthrit.2015.04.014	0	1	NA	NA	NA	1_NA_NA_NA
krementsov, dn; case, lk; hickey, wf; teuscher, c	exacerbation of autoimmune neuroinflammation by dietary sodium is genetically controlled and sex specific	faseb journal	2015	10.1096/fj.15-272542	13	1	b	a	NA	1_b_a_NA
krementsov, dn; case, lk; hickey, wf; teuscher, c	exacerbation of autoimmune neuroinflammation by dietary sodium is genetically controlled and sex specific	faseb journal	2015	10.1096/fj.15-272542	13	1	b	NA	NA	1_b_NA_NA
krementsov, dn; case, lk; hickey, wf; teuscher, c	exacerbation of autoimmune neuroinflammation by dietary sodium is genetically controlled and sex specific	faseb journal	2015	10.1096/fj.15-272542	13	1	NA	NA	NA	1_NA_NA_NA
johansson, o; redmayne, m	exacerbation of demyelinating syndrome after exposure to wireless modem with public hotspot	electromagnetic biology and medicine	2016	10.3109/15368378.2015.1107839	0	NA	NA	NA	NA	NA_NA_NA_NA
di marco, r; mangano, k; quattrocchi, c; amato, f; nicoletti, f; buschard, k	exacerbation of protracted-relapsing experimental allergic encephalomyelitis in da rats by gluten-free diet	apmis	2004	10.1111/j.1600-0463.2004.apm1121003.x	4	1	a	b	NA	1_a_b_NA
di marco, r; mangano, k; quattrocchi, c; amato, f; nicoletti, f; buschard, k	exacerbation of protracted-relapsing experimental allergic encephalomyelitis in da rats by gluten-free diet	apmis	2004	10.1111/j.1600-0463.2004.apm1121003.x	4	1	a	NA	NA	1_a_NA_NA
di marco, r; mangano, k; quattrocchi, c; amato, f; nicoletti, f; buschard, k	exacerbation of protracted-relapsing experimental allergic encephalomyelitis in da rats by gluten-free diet	apmis	2004	10.1111/j.1600-0463.2004.apm1121003.x	4	1	NA	NA	NA	1_NA_NA_NA
paz, es; maciel, pmct; d'almeida, jac; silva, byd; sampaio, had; pinheiro, adv; carioca, aaf; de melo, mlp	excess weight, central adiposity and pro-inflammatory diet consumption in patients with neuromyelitis optica spectrum disorder	multiple sclerosis and related disorders	2021	10.1016/j.msard.2021.103110	0	1	a	a	b	1_a_a_b
paz, es; maciel, pmct; d'almeida, jac; silva, byd; sampaio, had; pinheiro, adv; carioca, aaf; de melo, mlp	excess weight, central adiposity and pro-inflammatory diet consumption in patients with neuromyelitis optica spectrum disorder	multiple sclerosis and related disorders	2021	10.1016/j.msard.2021.103110	0	1	a	a	NA	1_a_a_NA
paz, es; maciel, pmct; d'almeida, jac; silva, byd; sampaio, had; pinheiro, adv; carioca, aaf; de melo, mlp	excess weight, central adiposity and pro-inflammatory diet consumption in patients with neuromyelitis optica spectrum disorder	multiple sclerosis and related disorders	2021	10.1016/j.msard.2021.103110	0	1	a	NA	NA	1_a_NA_NA
paz, es; maciel, pmct; d'almeida, jac; silva, byd; sampaio, had; pinheiro, adv; carioca, aaf; de melo, mlp	excess weight, central adiposity and pro-inflammatory diet consumption in patients with neuromyelitis optica spectrum disorder	multiple sclerosis and related disorders	2021	10.1016/j.msard.2021.103110	0	1	NA	NA	NA	1_NA_NA_NA
gubert, c; kong, g; renoir, t; hannan, aj	exercise, diet and stress as modulators of gut microbiota: implications for neurodegenerative diseases	neurobiology of disease	2020	10.1016/j.nbd.2019.104621	1	1	b	b	NA	1_b_b_NA
gubert, c; kong, g; renoir, t; hannan, aj	exercise, diet and stress as modulators of gut microbiota: implications for neurodegenerative diseases	neurobiology of disease	2020	10.1016/j.nbd.2019.104621	1	1	b	NA	NA	1_b_NA_NA
gubert, c; kong, g; renoir, t; hannan, aj	exercise, diet and stress as modulators of gut microbiota: implications for neurodegenerative diseases	neurobiology of disease	2020	10.1016/j.nbd.2019.104621	1	1	NA	NA	NA	1_NA_NA_NA
sung, c; chiu, cy; lee, ej; bezyak, j; chan, f; muller, v	exercise, diet, and stress management as mediators between functional disability and health-related quality of life in multiple sclerosis	rehabilitation counseling bulletin	2013	10.1177/0034355212439899	1	1	a	a	NA	1_a_a_NA
sung, c; chiu, cy; lee, ej; bezyak, j; chan, f; muller, v	exercise, diet, and stress management as mediators between functional disability and health-related quality of life in multiple sclerosis	rehabilitation counseling bulletin	2013	10.1177/0034355212439899	1	1	a	NA	NA	1_a_NA_NA
sung, c; chiu, cy; lee, ej; bezyak, j; chan, f; muller, v	exercise, diet, and stress management as mediators between functional disability and health-related quality of life in multiple sclerosis	rehabilitation counseling bulletin	2013	10.1177/0034355212439899	1	1	NA	NA	NA	1_NA_NA_NA
granieri, e	exogeneous factors in the aetiology of multiple sclerosis	journal of neurovirology	2000	NA	1	1	a	b	NA	1_a_b_NA
granieri, e	exogeneous factors in the aetiology of multiple sclerosis	journal of neurovirology	2000	NA	1	1	a	NA	NA	1_a_NA_NA
granieri, e	exogeneous factors in the aetiology of multiple sclerosis	journal of neurovirology	2000	NA	1	1	NA	NA	NA	1_NA_NA_NA
martinez-sobrepera, hj; cabrera-gomez, ja; tuero-iglesias, a	exogenous factors in the aetiology of multiple sclerosis in cuba. a study of cases and controls	revista de neurologia	2001	10.33588/rn.3310.2001333	0	1	a	b	NA	1_a_b_NA
martinez-sobrepera, hj; cabrera-gomez, ja; tuero-iglesias, a	exogenous factors in the aetiology of multiple sclerosis in cuba. a study of cases and controls	revista de neurologia	2001	10.33588/rn.3310.2001333	0	1	a	NA	NA	1_a_NA_NA
martinez-sobrepera, hj; cabrera-gomez, ja; tuero-iglesias, a	exogenous factors in the aetiology of multiple sclerosis in cuba. a study of cases and controls	revista de neurologia	2001	10.33588/rn.3310.2001333	0	1	NA	NA	NA	1_NA_NA_NA
zhang, j; buller, ba; zhang, zg; zhang, y; lu, m; rosene, dl; medalla, m; moore, tl; chopp, m	exosomes derived from bone marrow mesenchymal stromal cells promote remyelination and reduce neuroinflammation in the demyelinating central nervous system	experimental neurology	2022	10.1016/j.expneurol.2021.113895	0	2	b	NA	NA	2_b_NA_NA
zhang, j; buller, ba; zhang, zg; zhang, y; lu, m; rosene, dl; medalla, m; moore, tl; chopp, m	exosomes derived from bone marrow mesenchymal stromal cells promote remyelination and reduce neuroinflammation in the demyelinating central nervous system	experimental neurology	2022	10.1016/j.expneurol.2021.113895	0	2	NA	NA	NA	2_NA_NA_NA
jones, g	expanding role for vitamin d in chronic kidney disease: importance of blood 25-oh-d levels and extra-renal 1 alpha-hydroxylase in the classical and nonclassical actions of 1 alpha,25-dihydroxyvitamin d-3	seminars in dialysis	2007	10.1111/j.1525-139x.2007.00302.x	0	1	c	a	NA	1_c_a_NA
jones, g	expanding role for vitamin d in chronic kidney disease: importance of blood 25-oh-d levels and extra-renal 1 alpha-hydroxylase in the classical and nonclassical actions of 1 alpha,25-dihydroxyvitamin d-3	seminars in dialysis	2007	10.1111/j.1525-139x.2007.00302.x	0	1	c	NA	NA	1_c_NA_NA
jones, g	expanding role for vitamin d in chronic kidney disease: importance of blood 25-oh-d levels and extra-renal 1 alpha-hydroxylase in the classical and nonclassical actions of 1 alpha,25-dihydroxyvitamin d-3	seminars in dialysis	2007	10.1111/j.1525-139x.2007.00302.x	0	1	NA	NA	NA	1_NA_NA_NA
nguyen, va; le, t; tong, m; mellion, m; gilchrist, j; de la monte, sm	experimental alcohol-related peripheral neuropathy: role of insulin/igf resistance	nutrients	2012	10.3390/nu4081042	0	NA	NA	NA	NA	NA_NA_NA_NA
brown, ca; harmon, bg; zhao, t; doyle, mp	experimental escherichia coli o157:h7 carriage in calves	applied and environmental microbiology	1997	10.1128/aem.63.1.27-32.1997	0	NA	NA	NA	NA	NA_NA_NA_NA
cray, wc; moon, hw	experimental-infection of calves and adult cattle with escherichia-coli o157-h7	applied and environmental microbiology	1995	10.1128/aem.61.4.1586-1590.1995	1	NA	NA	NA	NA	NA_NA_NA_NA
tyszka, ac; farber, rs	exploring the relation of health-promoting behaviors to role participation and health-related quality of life in women with multiple sclerosis: a pilot study	american journal of occupational therapy	2010	10.5014/ajot.2010.07121	1	1	NA	NA	NA	1_NA_NA_NA
venasse, m; edwards, t; pilutti, la	exploring wellness interventions in progressive multiple sclerosis: an evidence-based review	current treatment options in neurology	2018	10.1007/s11940-018-0497-2	5	1	a	a	a	1_a_a_a
venasse, m; edwards, t; pilutti, la	exploring wellness interventions in progressive multiple sclerosis: an evidence-based review	current treatment options in neurology	2018	10.1007/s11940-018-0497-2	5	1	a	a	NA	1_a_a_NA
venasse, m; edwards, t; pilutti, la	exploring wellness interventions in progressive multiple sclerosis: an evidence-based review	current treatment options in neurology	2018	10.1007/s11940-018-0497-2	5	1	a	NA	NA	1_a_NA_NA
venasse, m; edwards, t; pilutti, la	exploring wellness interventions in progressive multiple sclerosis: an evidence-based review	current treatment options in neurology	2018	10.1007/s11940-018-0497-2	5	1	NA	NA	NA	1_NA_NA_NA
nitta, t; bernstein, jj; yagita, h; sato, k; okumura, k	expression of fc-gamma receptors on astroglial cell-lines and their role in the central-nervous-system	neurosurgery	1992	10.1227/00006123-199207000-00012	0	NA	NA	NA	NA	NA_NA_NA_NA
duncan, id; brower, a; kondo, y; curlee, jf; schultz, rd	extensive remyelination of the cns leads to functional recovery	proceedings of the national academy of sciences of the united states of america	2009	10.1073/pnas.0812500106	6	2	b	NA	NA	2_b_NA_NA
duncan, id; brower, a; kondo, y; curlee, jf; schultz, rd	extensive remyelination of the cns leads to functional recovery	proceedings of the national academy of sciences of the united states of america	2009	10.1073/pnas.0812500106	6	2	NA	NA	NA	2_NA_NA_NA
aparicio-soto, m; sanchez-hidalgo, m; rosillo, ma; castejon, ml; alarcon-de-la-lastra, c	extra virgin olive oil: a key functional food for prevention of immune-inflammatory diseases	food & function	2016	10.1039/c6fo01094f	2	NA	NA	NA	NA	NA_NA_NA_NA
wright, jw; kramar, ea; meighan, se; harding, jw	extracellular matrix molecules, long-term potentiation, memory consolidation and the brain angiotensin system	peptides	2002	10.1016/s0196-9781(01)00599-x	0	NA	NA	NA	NA	NA_NA_NA_NA
baudron, cr; franceschi, f; salles, n; gasbarrini, a	extragastric diseases and helicobacter pylori	helicobacter	2013	10.1111/hel.12077	0	NA	NA	NA	NA	NA_NA_NA_NA
almutairi, mma; gong, c; xu, yg; chang, yz; shi, hl	factors controlling permeability of the blood-brain barrier	cellular and molecular life sciences	2016	10.1007/s00018-015-2050-8	0	NA	NA	NA	NA	NA_NA_NA_NA
faber, w; stolwijk-swuste, j; van ginkel, f; nachtegaal, j; zoetendal, e; winkels, r; witteman, b	faecal microbiota in patients with neurogenic bowel dysfunction and spinal cord injury or multiple sclerosis-a systematic review	journal of clinical medicine	2021	10.3390/jcm10081598	0	NA	NA	NA	NA	NA_NA_NA_NA
jose, ao; cecilia, sc; alfonso, cj; luis, pm; gabriela, scb; brun, e	familal mitochondrial neurogastrointestinal encephalomyopathy (mngie) syndrome in three siblings of consanguineous parents	revista mexicana de neurociencia	2010	NA	0	NA	NA	NA	NA	NA_NA_NA_NA
o'riordan, r; doran, m; connolly, d	fatigue and activity management education for individuals with systemic lupus erythematosus	occupational therapy international	2017	10.1155/2017/4530104	0	NA	NA	NA	NA	NA_NA_NA_NA
morelli, v	fatigue and chronic fatigue in the elderly: definitions, diagnoses, and treatments	clinics in geriatric medicine	2011	10.1016/j.cger.2011.07.011	1	4	NA	NA	NA	4_NA_NA_NA
hammell, kw; miller, wc; forwell, sj; forman, be; jacobsen, ba	fatigue and spinal cord injury: a qualitative analysis	spinal cord	2009	10.1038/sc.2008.68	0	NA	NA	NA	NA	NA_NA_NA_NA
artom, m; moss-morris, r; caskey, f; chilcot, j	fatigue in advanced kidney disease	kidney international	2014	10.1038/ki.2014.86	0	NA	NA	NA	NA	NA_NA_NA_NA
zalai, d; carney, ce; sherman, m; shapiro, cm; mcshane, k	fatigue in chronic hepatitis c infection: understanding patients' experience from a cognitive-behavioural perspective	british journal of health psychology	2016	10.1111/bjhp.12155	0	NA	NA	NA	NA	NA_NA_NA_NA
zielinski, mr; systrom, dm; rose, nr	fatigue, sleep, and autoimmune and related disorders	frontiers in immunology	2019	10.3389/fimmu.2019.01827	0	NA	NA	NA	NA	NA_NA_NA_NA
pohlau, d; hoffmann, v; orlowski, g; adam, o; seidel, d; amoiridis, g; przuntek, h	fats and multiple sclerosis	ernahrungs-umschau	1997	NA	0	1	a	b	NA	1_a_b_NA
pohlau, d; hoffmann, v; orlowski, g; adam, o; seidel, d; amoiridis, g; przuntek, h	fats and multiple sclerosis	ernahrungs-umschau	1997	NA	0	1	a	NA	NA	1_a_NA_NA
pohlau, d; hoffmann, v; orlowski, g; adam, o; seidel, d; amoiridis, g; przuntek, h	fats and multiple sclerosis	ernahrungs-umschau	1997	NA	0	1	NA	NA	NA	1_NA_NA_NA
torkildsen, o; loken-amsrud, ki; wergeland, s; myhr, km; holmoy, t	fat-soluble vitamins as disease modulators in multiple sclerosis	acta neurologica scandinavica	2013	10.1111/ane.12045	6	1	a	a	b	1_a_a_b
torkildsen, o; loken-amsrud, ki; wergeland, s; myhr, km; holmoy, t	fat-soluble vitamins as disease modulators in multiple sclerosis	acta neurologica scandinavica	2013	10.1111/ane.12045	6	1	a	a	NA	1_a_a_NA
torkildsen, o; loken-amsrud, ki; wergeland, s; myhr, km; holmoy, t	fat-soluble vitamins as disease modulators in multiple sclerosis	acta neurologica scandinavica	2013	10.1111/ane.12045	6	1	a	NA	NA	1_a_NA_NA
torkildsen, o; loken-amsrud, ki; wergeland, s; myhr, km; holmoy, t	fat-soluble vitamins as disease modulators in multiple sclerosis	acta neurologica scandinavica	2013	10.1111/ane.12045	6	1	NA	NA	NA	1_NA_NA_NA
bogie, jfj; haidar, m; kooij, g; hendriks, jja	fatty acid metabolism in the progression and resolution of cns disorders	advanced drug delivery reviews	2020	10.1016/j.addr.2020.01.004	0	1	a	NA	NA	1_a_NA_NA
bogie, jfj; haidar, m; kooij, g; hendriks, jja	fatty acid metabolism in the progression and resolution of cns disorders	advanced drug delivery reviews	2020	10.1016/j.addr.2020.01.004	0	1	NA	NA	NA	1_NA_NA_NA
salles, j; sargueil, f; knoll-gellida, a; witters, la; shy, m; jiang, hy; cassagne, c; garbay, b	fatty acid synthase expression during peripheral nervous system myelination	molecular brain research	2002	10.1016/s0169-328x(02)00161-4	0	NA	NA	NA	NA	NA_NA_NA_NA
ahumada-pascual, p; ganan, dg; montero, yeb; velasco, a	fatty acids and antioxidants in multiple sclerosis: therapeutic role of gemsp	current pharmaceutical design	2019	10.2174/1381612825666190312105755	0	1	a	NA	NA	1_a_NA_NA
ahumada-pascual, p; ganan, dg; montero, yeb; velasco, a	fatty acids and antioxidants in multiple sclerosis: therapeutic role of gemsp	current pharmaceutical design	2019	10.2174/1381612825666190312105755	0	1	NA	NA	NA	1_NA_NA_NA
dal monte, m; cammalleri, m; locri, f; amato, r; marsili, s; rusciano, d; bagnoli, p	fatty acids dietary supplements exert anti-inflammatory action and limit ganglion cell degeneration in the retina of the eae mouse model of multiple sclerosis	nutrients	2018	10.3390/nu10030325	1	1	a	a	a	1_a_a_a
dal monte, m; cammalleri, m; locri, f; amato, r; marsili, s; rusciano, d; bagnoli, p	fatty acids dietary supplements exert anti-inflammatory action and limit ganglion cell degeneration in the retina of the eae mouse model of multiple sclerosis	nutrients	2018	10.3390/nu10030325	1	1	a	a	NA	1_a_a_NA
dal monte, m; cammalleri, m; locri, f; amato, r; marsili, s; rusciano, d; bagnoli, p	fatty acids dietary supplements exert anti-inflammatory action and limit ganglion cell degeneration in the retina of the eae mouse model of multiple sclerosis	nutrients	2018	10.3390/nu10030325	1	1	a	NA	NA	1_a_NA_NA
dal monte, m; cammalleri, m; locri, f; amato, r; marsili, s; rusciano, d; bagnoli, p	fatty acids dietary supplements exert anti-inflammatory action and limit ganglion cell degeneration in the retina of the eae mouse model of multiple sclerosis	nutrients	2018	10.3390/nu10030325	1	1	NA	NA	NA	1_NA_NA_NA
de andres, c; lledo, a	fatty diet and multiple sclerosis	revista de neurologia	1997	NA	0	1	a	b	NA	1_a_b_NA
de andres, c; lledo, a	fatty diet and multiple sclerosis	revista de neurologia	1997	NA	0	1	a	NA	NA	1_a_NA_NA
de andres, c; lledo, a	fatty diet and multiple sclerosis	revista de neurologia	1997	NA	0	1	NA	NA	NA	1_NA_NA_NA
wingo, bc; rinker, jr; goss, am; green, k; wicks, v; cutter, gr; motl, rw	feasibility of improving dietary quality using a telehealth lifestyle intervention for adults with multiple sclerosis	multiple sclerosis and related disorders	2020	10.1016/j.msard.2020.102504	0	1	a	a	a	1_a_a_a
wingo, bc; rinker, jr; goss, am; green, k; wicks, v; cutter, gr; motl, rw	feasibility of improving dietary quality using a telehealth lifestyle intervention for adults with multiple sclerosis	multiple sclerosis and related disorders	2020	10.1016/j.msard.2020.102504	0	1	a	a	NA	1_a_a_NA
wingo, bc; rinker, jr; goss, am; green, k; wicks, v; cutter, gr; motl, rw	feasibility of improving dietary quality using a telehealth lifestyle intervention for adults with multiple sclerosis	multiple sclerosis and related disorders	2020	10.1016/j.msard.2020.102504	0	1	a	NA	NA	1_a_NA_NA
wingo, bc; rinker, jr; goss, am; green, k; wicks, v; cutter, gr; motl, rw	feasibility of improving dietary quality using a telehealth lifestyle intervention for adults with multiple sclerosis	multiple sclerosis and related disorders	2020	10.1016/j.msard.2020.102504	0	1	NA	NA	NA	1_NA_NA_NA
silveira, sl; jeng, b; gower, ba; motl, rw	feasibility, acceptability, and preliminary validity of self-report dietary assessment in adults with multiple sclerosis: comparison with doubly labeled water measured total energy expenditure	nutrients	2021	10.3390/nu13041198	0	1	a	a	a	1_a_a_a
silveira, sl; jeng, b; gower, ba; motl, rw	feasibility, acceptability, and preliminary validity of self-report dietary assessment in adults with multiple sclerosis: comparison with doubly labeled water measured total energy expenditure	nutrients	2021	10.3390/nu13041198	0	1	a	a	NA	1_a_a_NA
silveira, sl; jeng, b; gower, ba; motl, rw	feasibility, acceptability, and preliminary validity of self-report dietary assessment in adults with multiple sclerosis: comparison with doubly labeled water measured total energy expenditure	nutrients	2021	10.3390/nu13041198	0	1	a	NA	NA	1_a_NA_NA
silveira, sl; jeng, b; gower, ba; motl, rw	feasibility, acceptability, and preliminary validity of self-report dietary assessment in adults with multiple sclerosis: comparison with doubly labeled water measured total energy expenditure	nutrients	2021	10.3390/nu13041198	0	1	NA	NA	NA	1_NA_NA_NA
nandwana, v; debbarma, s	fecal microbiota transplantation: a microbiome modulation technique for alzheimer's disease	cureus	2021	10.7759/cureus.16503	0	1	b	c	NA	1_b_c_NA
nandwana, v; debbarma, s	fecal microbiota transplantation: a microbiome modulation technique for alzheimer's disease	cureus	2021	10.7759/cureus.16503	0	1	b	NA	NA	1_b_NA_NA
nandwana, v; debbarma, s	fecal microbiota transplantation: a microbiome modulation technique for alzheimer's disease	cureus	2021	10.7759/cureus.16503	0	1	NA	NA	NA	1_NA_NA_NA
radcliff, ab; heidari, m; field, as; duncan, id	feline irradiated diet-induced demyelination; a model of the neuropathology of sub-acute combined degeneration?	plos one	2020	10.1371/journal.pone.0228109	0	2	b	NA	NA	2_b_NA_NA
radcliff, ab; heidari, m; field, as; duncan, id	feline irradiated diet-induced demyelination; a model of the neuropathology of sub-acute combined degeneration?	plos one	2020	10.1371/journal.pone.0228109	0	2	NA	NA	NA	2_NA_NA_NA
jhelum, p; santos-nogueira, e; teo, w; haumont, a; lenoel, i; stys, pk; david, s	ferroptosis mediates cuprizone-induced loss of oligodendrocytes and demyelination	journal of neuroscience	2020	10.1523/jneurosci.1749-20.2020	0	2	a	NA	NA	2_a_NA_NA
jhelum, p; santos-nogueira, e; teo, w; haumont, a; lenoel, i; stys, pk; david, s	ferroptosis mediates cuprizone-induced loss of oligodendrocytes and demyelination	journal of neuroscience	2020	10.1523/jneurosci.1749-20.2020	0	2	NA	NA	NA	2_NA_NA_NA
mierzwa, aj; zhou, yx; hibbits, n; vana, ac; armstrong, rc	fgf2 and fgfr1 signaling regulate functional recovery following cuprizone demyelination	neuroscience letters	2013	10.1016/j.neulet.2013.05.010	0	2	a	NA	NA	2_a_NA_NA
mierzwa, aj; zhou, yx; hibbits, n; vana, ac; armstrong, rc	fgf2 and fgfr1 signaling regulate functional recovery following cuprizone demyelination	neuroscience letters	2013	10.1016/j.neulet.2013.05.010	0	2	NA	NA	NA	2_NA_NA_NA
beckurts, kte; stippel, d; schleimer, k; schafer, h; benz, c; dienes, hp; holscher, ah	first case of isolated small bowel transplantation at the university of cologne: rejection-free course under quadruple immunosuppression and endoluminal monitoring with video-capsule	transplantation proceedings	2004	10.1016/j.transproceed.2004.01.104	0	NA	NA	NA	NA	NA_NA_NA_NA
ashtari, f; jamshidi, f; shoormasti, rs; pourpak, z; akbari, m; zandieh, f	fish and egg specific immunoglobin e in multiple sclerosis patients	international journal of preventive medicine	2013	NA	0	1	a	NA	NA	1_a_NA_NA
ashtari, f; jamshidi, f; shoormasti, rs; pourpak, z; akbari, m; zandieh, f	fish and egg specific immunoglobin e in multiple sclerosis patients	international journal of preventive medicine	2013	NA	0	1	NA	NA	NA	1_NA_NA_NA
gerbi, a; maixent, jm; ansaldi, jl; pierlovisi, m; coste, t; pelissier, jf; vague, p; raccah, d	fish oil supplementation prevents diabetes-induced nerve conduction velocity and neuroanatomical changes in rats	journal of nutrition	1999	10.1093/jn/129.1.207	0	NA	NA	NA	NA	NA_NA_NA_NA
coe, s; axelsson, e; murphy, v; santos, m; collett, j; clegg, m; izadi, h; harrison, jm	flavonoid rich dark cocoa may improve fatigue in people with multiple sclerosis, yet has no effect on glycaemic response: an exploratory trial	clinical nutrition espen	2017	10.1016/j.clnesp.2017.07.002	1	1	a	b	NA	1_a_b_NA
coe, s; axelsson, e; murphy, v; santos, m; collett, j; clegg, m; izadi, h; harrison, jm	flavonoid rich dark cocoa may improve fatigue in people with multiple sclerosis, yet has no effect on glycaemic response: an exploratory trial	clinical nutrition espen	2017	10.1016/j.clnesp.2017.07.002	1	1	a	NA	NA	1_a_NA_NA
coe, s; axelsson, e; murphy, v; santos, m; collett, j; clegg, m; izadi, h; harrison, jm	flavonoid rich dark cocoa may improve fatigue in people with multiple sclerosis, yet has no effect on glycaemic response: an exploratory trial	clinical nutrition espen	2017	10.1016/j.clnesp.2017.07.002	1	1	NA	NA	NA	1_NA_NA_NA
orlowski, g; brand, r; holsten, p; pohlau, d	food intake, nutrient density and nutrient supply of ms patients	ernahrungs umschau	1996	NA	2	1	a	b	NA	1_a_b_NA
orlowski, g; brand, r; holsten, p; pohlau, d	food intake, nutrient density and nutrient supply of ms patients	ernahrungs umschau	1996	NA	2	1	a	NA	NA	1_a_NA_NA
orlowski, g; brand, r; holsten, p; pohlau, d	food intake, nutrient density and nutrient supply of ms patients	ernahrungs umschau	1996	NA	2	1	NA	NA	NA	1_NA_NA_NA
blanchette, m; daneman, r	formation and maintenance of the bbb	mechanisms of development	2015	10.1016/j.mod.2015.07.007	0	NA	NA	NA	NA	NA_NA_NA_NA
evans, ph	free-radicals in brain metabolism and pathology	british medical bulletin	1993	10.1093/oxfordjournals.bmb.a072632	1	1	a	a	a	1_a_a_a
evans, ph	free-radicals in brain metabolism and pathology	british medical bulletin	1993	10.1093/oxfordjournals.bmb.a072632	1	1	a	a	NA	1_a_a_NA
evans, ph	free-radicals in brain metabolism and pathology	british medical bulletin	1993	10.1093/oxfordjournals.bmb.a072632	1	1	a	NA	NA	1_a_NA_NA
evans, ph	free-radicals in brain metabolism and pathology	british medical bulletin	1993	10.1093/oxfordjournals.bmb.a072632	1	1	NA	NA	NA	1_NA_NA_NA
stancic, s	from infectious diseases to lifestyle medicine: my personal journey	american journal of lifestyle medicine	2018	10.1177/1559827618766472	0	NA	NA	NA	NA	NA_NA_NA_NA
ouellette, j; lacoste, b	from neurodevelopmental to neurodegenerative disorders: the vascular continuum	frontiers in aging neuroscience	2021	10.3389/fnagi.2021.749026	0	NA	NA	NA	NA	NA_NA_NA_NA
rohrbach, td; asgharpour, a; maczis, ma; montefusco, d; cowart, la; bedossa, p; sanyal, aj; spiegel, s	fty720/fingolimod decreases hepatic steatosis and expression of fatty acid synthase in diet-induced nonalcoholic fatty liver disease in mice	journal of lipid research	2019	10.1194/jlr.m093799	0	NA	NA	NA	NA	NA_NA_NA_NA
kim, s; bielawski, j; yang, h; kong, y; zhou, by; li, jr	functional antagonism of sphingosine-1-phosphate receptor 1 prevents cuprizone-induced demyelination	glia	2018	10.1002/glia.23272	0	2	a	NA	NA	2_a_NA_NA
kim, s; bielawski, j; yang, h; kong, y; zhou, by; li, jr	functional antagonism of sphingosine-1-phosphate receptor 1 prevents cuprizone-induced demyelination	glia	2018	10.1002/glia.23272	0	2	NA	NA	NA	2_NA_NA_NA
yamate-morgan, h; lauderdale, k; horeczko, j; merchant, u; tiwari-woodruff, sk	functional effects of cuprizone-induced demyelination in the presence of the mtor-inhibitor rapamycin	neuroscience	2019	10.1016/j.neuroscience.2019.01.038	1	2	b	NA	NA	2_b_NA_NA
yamate-morgan, h; lauderdale, k; horeczko, j; merchant, u; tiwari-woodruff, sk	functional effects of cuprizone-induced demyelination in the presence of the mtor-inhibitor rapamycin	neuroscience	2019	10.1016/j.neuroscience.2019.01.038	1	2	NA	NA	NA	2_NA_NA_NA
schluter, a; espinosa, l; fourcade, s; galino, j; lopez, e; ilieva, e; morato, l; asheuer, m; cook, t; mclaren, a; reid, j; kelly, f; bates, s; aubourg, p; galea, e; pujol, a	functional genomic analysis unravels a metabolic-inflammatory interplay in adrenoleukodystrophy	human molecular genetics	2012	10.1093/hmg/ddr536	0	NA	NA	NA	NA	NA_NA_NA_NA
matusik, e; augustak, a; durmala, j	functional mobility and basic motor skills in patients with multiple sclerosis and its relation to the anthropometrical status and body composition parameters	medicina-lithuania	2019	10.3390/medicina55120773	1	1	a	a	a	1_a_a_a
matusik, e; augustak, a; durmala, j	functional mobility and basic motor skills in patients with multiple sclerosis and its relation to the anthropometrical status and body composition parameters	medicina-lithuania	2019	10.3390/medicina55120773	1	1	a	a	NA	1_a_a_NA
matusik, e; augustak, a; durmala, j	functional mobility and basic motor skills in patients with multiple sclerosis and its relation to the anthropometrical status and body composition parameters	medicina-lithuania	2019	10.3390/medicina55120773	1	1	a	NA	NA	1_a_NA_NA
matusik, e; augustak, a; durmala, j	functional mobility and basic motor skills in patients with multiple sclerosis and its relation to the anthropometrical status and body composition parameters	medicina-lithuania	2019	10.3390/medicina55120773	1	1	NA	NA	NA	1_NA_NA_NA
crawford, dk; mangiardi, m; xia, x; lopez-valdes, he; tiwari-woodruff, sk	functional recovery of callosal axons following demyelination: a critical window	neuroscience	2009	10.1016/j.neuroscience.2009.09.069	6	2	b	NA	NA	2_b_NA_NA
crawford, dk; mangiardi, m; xia, x; lopez-valdes, he; tiwari-woodruff, sk	functional recovery of callosal axons following demyelination: a critical window	neuroscience	2009	10.1016/j.neuroscience.2009.09.069	6	2	NA	NA	NA	2_NA_NA_NA
dodelet-devillers, a; cayrol, r; horssen, j; haqqani, as; de vries, he; engelhardt, b; greenwood, j; prat, a	functions of lipid raft membrane microdomains at the blood-brain barrier	journal of molecular medicine-jmm	2009	10.1007/s00109-009-0488-6	1	NA	NA	NA	NA	NA_NA_NA_NA
locri, f; cammalleri, m; pini, a; dal monte, m; rusciano, d; bagnoli, p	further evidence on efficacy of diet supplementation with fatty acids in ocular pathologies: insights from the eae model of optic neuritis	nutrients	2018	10.3390/nu10101447	1	1	a	a	a	1_a_a_a
locri, f; cammalleri, m; pini, a; dal monte, m; rusciano, d; bagnoli, p	further evidence on efficacy of diet supplementation with fatty acids in ocular pathologies: insights from the eae model of optic neuritis	nutrients	2018	10.3390/nu10101447	1	1	a	a	NA	1_a_a_NA
locri, f; cammalleri, m; pini, a; dal monte, m; rusciano, d; bagnoli, p	further evidence on efficacy of diet supplementation with fatty acids in ocular pathologies: insights from the eae model of optic neuritis	nutrients	2018	10.3390/nu10101447	1	1	a	NA	NA	1_a_NA_NA
locri, f; cammalleri, m; pini, a; dal monte, m; rusciano, d; bagnoli, p	further evidence on efficacy of diet supplementation with fatty acids in ocular pathologies: insights from the eae model of optic neuritis	nutrients	2018	10.3390/nu10101447	1	1	NA	NA	NA	1_NA_NA_NA
hoyos, hc; rinaldi, m; mendez-huergo, sp; marder, m; rabinovich, ga; pasquini, jm; pasquini, la	galectin-3 controls the response of microglial cells to limit cuprizone-induced demyelination	neurobiology of disease	2014	10.1016/j.nbd.2013.10.023	2	2	a	NA	NA	2_a_NA_NA
hoyos, hc; rinaldi, m; mendez-huergo, sp; marder, m; rabinovich, ga; pasquini, jm; pasquini, la	galectin-3 controls the response of microglial cells to limit cuprizone-induced demyelination	neurobiology of disease	2014	10.1016/j.nbd.2013.10.023	2	2	NA	NA	NA	2_NA_NA_NA
luzon-toro, b; zafra-gomez, a; ballesteros, o	gas chromatographic-mass spectrometric determination of brain levels of alpha-cholest-8-en-3 beta-ol (lathosterol)	journal of chromatography b-analytical technologies in the biomedical and life sciences	2007	10.1016/j.jchromb.2006.11.022	0	NA	NA	NA	NA	NA_NA_NA_NA
tsiperson, v; li, xs; schwartz, gj; raine, cs; shafit-zagardo, b	gas6 enhances repair following cuprizone-induced demyelination	plos one	2010	10.1371/journal.pone.0015748	1	2	NA	NA	NA	2_NA_NA_NA
camilleri, m	gastrointestinal motility disorders in neurologic disease	journal of clinical investigation	2021	10.1172/jci143771	0	NA	NA	NA	NA	NA_NA_NA_NA
valeiras, b; siri, mvr; codagnone, m; reines, a; pasquini, jm	gender influence on schizophrenia-relevant abnormalities in a cuprizone demyelination model	glia	2014	10.1002/glia.22704	1	2	a	NA	NA	2_a_NA_NA
valeiras, b; siri, mvr; codagnone, m; reines, a; pasquini, jm	gender influence on schizophrenia-relevant abnormalities in a cuprizone demyelination model	glia	2014	10.1002/glia.22704	1	2	NA	NA	NA	2_NA_NA_NA
yousefian, m; nemati, r; daryabor, g; gholijani, n; nikseresht, a; borhani-haghighi, a; kamali-sarvestani, e	gender-specific association of leptin and adiponectin genes with multiple sclerosis	american journal of the medical sciences	2018	10.1016/j.amjms.2018.03.008	1	1	b	d	NA	1_b_d_NA
yousefian, m; nemati, r; daryabor, g; gholijani, n; nikseresht, a; borhani-haghighi, a; kamali-sarvestani, e	gender-specific association of leptin and adiponectin genes with multiple sclerosis	american journal of the medical sciences	2018	10.1016/j.amjms.2018.03.008	1	1	b	NA	NA	1_b_NA_NA
yousefian, m; nemati, r; daryabor, g; gholijani, n; nikseresht, a; borhani-haghighi, a; kamali-sarvestani, e	gender-specific association of leptin and adiponectin genes with multiple sclerosis	american journal of the medical sciences	2018	10.1016/j.amjms.2018.03.008	1	1	NA	NA	NA	1_NA_NA_NA
morell, p; barrett, cv; mason, jl; toews, ad; hostettler, jd; knapp, gw; matsushima, gk	gene expression in brain during cuprizone-induced demyelination and remyelination	molecular and cellular neuroscience	1998	10.1006/mcne.1998.0715	31	2	a	NA	NA	2_a_NA_NA
morell, p; barrett, cv; mason, jl; toews, ad; hostettler, jd; knapp, gw; matsushima, gk	gene expression in brain during cuprizone-induced demyelination and remyelination	molecular and cellular neuroscience	1998	10.1006/mcne.1998.0715	31	2	NA	NA	NA	2_NA_NA_NA
lin, kp; kwan, sy; chen, sy; chen, ss; yeung, kb; chia, lg; wu, za	generalized neuropathy in taiwan - an etiologic survey	neuroepidemiology	1993	10.1159/000110326	0	NA	NA	NA	NA	NA_NA_NA_NA
george, ak; majumder, a; ice, h; homme, rp; eyob, w; tyagi, sc; singh, m	genes and genetics in hyperhomocysteinemia and the "1-carbon metabolism": implications for retinal structure and eye functions	canadian journal of physiology and pharmacology	2020	10.1139/cjpp-2019-0236	0	NA	NA	NA	NA	NA_NA_NA_NA
lozano, jcm; gomez, rm; sanabria, agz; jubiz, g; valderrama, sdo	genetic aspects of glial cells regarding neurodegenerative diseases	current pharmaceutical design	2018	10.2174/1381612823666170828134055	0	NA	NA	NA	NA	NA_NA_NA_NA
liu, j; divoux, a; sun, j; zhang, j; clement, k; glickman, jn; sukhova, gk; wolters, pj; du, j; gorgun, cz; doria, a; libby, p; blumberg, rs; kahn, bb; hotamisligil, gs; shi, gp	genetic deficiency and pharmacological stabilization of mast cells reduce diet-induced obesity and diabetes in mice	nature medicine	2009	10.1038/nm.1994	1	NA	NA	NA	NA	NA_NA_NA_NA
szilagyi, a; xue, xq	geographic associations between lactase phenotype, multiple sclerosis, and inflammatory bowel diseases; does obesity trump geography?	medical hypotheses	2016	10.1016/j.mehy.2016.10.001	0	1	b	a	NA	1_b_a_NA
szilagyi, a; xue, xq	geographic associations between lactase phenotype, multiple sclerosis, and inflammatory bowel diseases; does obesity trump geography?	medical hypotheses	2016	10.1016/j.mehy.2016.10.001	0	1	b	NA	NA	1_b_NA_NA
szilagyi, a; xue, xq	geographic associations between lactase phenotype, multiple sclerosis, and inflammatory bowel diseases; does obesity trump geography?	medical hypotheses	2016	10.1016/j.mehy.2016.10.001	0	1	NA	NA	NA	1_NA_NA_NA
kimlin, mg	geographic location and vitamin d synthesis	molecular aspects of medicine	2008	10.1016/j.mam.2008.08.005	2	1	c	a	NA	1_c_a_NA
kimlin, mg	geographic location and vitamin d synthesis	molecular aspects of medicine	2008	10.1016/j.mam.2008.08.005	2	1	c	NA	NA	1_c_NA_NA
kimlin, mg	geographic location and vitamin d synthesis	molecular aspects of medicine	2008	10.1016/j.mam.2008.08.005	2	1	NA	NA	NA	1_NA_NA_NA
mirzaei, f; michels, kb; munger, k; o'reilly, e; chitnis, t; forman, mr; giovannucci, e; rosner, b; ascherio, a	gestational vitamin d and the risk of multiple sclerosis in offspring	annals of neurology	2011	10.1002/ana.22456	15	1	c	a	NA	1_c_a_NA
mirzaei, f; michels, kb; munger, k; o'reilly, e; chitnis, t; forman, mr; giovannucci, e; rosner, b; ascherio, a	gestational vitamin d and the risk of multiple sclerosis in offspring	annals of neurology	2011	10.1002/ana.22456	15	1	c	NA	NA	1_c_NA_NA
mirzaei, f; michels, kb; munger, k; o'reilly, e; chitnis, t; forman, mr; giovannucci, e; rosner, b; ascherio, a	gestational vitamin d and the risk of multiple sclerosis in offspring	annals of neurology	2011	10.1002/ana.22456	15	1	NA	NA	NA	1_NA_NA_NA
willis, cl	glia-induced reversible disruption of blood-brain barrier integrity and neuropathological response of the neurovascular unit	toxicologic pathology	2011	10.1177/0192623310385830	0	NA	NA	NA	NA	NA_NA_NA_NA
broux, b; gowing, e; prat, a	glial regulation of the blood-brain barrier in health and disease	seminars in immunopathology	2015	10.1007/s00281-015-0516-2	0	NA	NA	NA	NA	NA_NA_NA_NA
white, s; harris, c; allan, m; chieffe, c; eelen, p; roder, c; mouzawak, c; naylor, ml	global peginterferon beta-1a tolerability management best practices: a nurse-focused delphi approach	neurology and therapy	2021	10.1007/s40120-021-00238-3	0	NA	NA	NA	NA	NA_NA_NA_NA
shor, dba; barzilai, o; ram, m; izhaky, d; porat-katz, bs; chapman, j; blank, m; anaya, jm; shoenfeld, y	gluten sensitivity in multiple sclerosis experimental myth or clinical truth?	contemporary challenges in autoimmunity	2009	10.1111/j.1749-6632.2009.04620.x	10	3	NA	NA	NA	3_NA_NA_NA
el-chammas, k; danner, e	gluten-free diet in nonceliac disease	nutrition in clinical practice	2011	10.1177/0884533611405538	2	3	NA	NA	NA	3_NA_NA_NA
palmieri, b; vadala, m; laurino, c	gluten-free diet in non-celiac patients: beliefs, truths, advantages and disadvantages	minerva gastroenterologica e dietologica	2019	10.23736/s1121-421x.18.02519-9	0	3	NA	NA	NA	3_NA_NA_NA
dittfeld, a; gwizdek, k; parol, d; michalski, m	glutenfree diet: characteristics of target groups	postepy higieny i medycyny doswiadczalnej	2018	10.5604/01.3001.0011.7376	0	3	NA	NA	NA	3_NA_NA_NA
hernandez-lahoz, c; rodrigo, l	gluten-related disorders and demyelinating diseases	medicina clinica	2013	10.1016/j.medcli.2012.07.009	2	3	NA	NA	NA	3_NA_NA_NA
martins, cp; new, la; o'connor, ec; previte, dm; cargill, kr; tse, il; sims-lucas, s; piganelli, jd	glycolysis inhibition induces functional and metabolic exhaustion of cd4(+) t cells in type 1 diabetes	frontiers in immunology	2021	10.3389/fimmu.2021.669456	0	NA	NA	NA	NA	NA_NA_NA_NA
wirth, r; dziewas, r; jager, m; warnecke, t; smoliner, c; stingel, k; leischker, ah	guideline of the german society for nutritional medicine (dgem) in cooperation with the geskes, the ake, the dgn and the dgge81	aktuelle ernahrungsmedizin	2013	10.1055/s-0033-1343317	1	1	a	b	NA	1_a_b_NA
wirth, r; dziewas, r; jager, m; warnecke, t; smoliner, c; stingel, k; leischker, ah	guideline of the german society for nutritional medicine (dgem) in cooperation with the geskes, the ake, the dgn and the dgge81	aktuelle ernahrungsmedizin	2013	10.1055/s-0033-1343317	1	1	a	NA	NA	1_a_NA_NA
wirth, r; dziewas, r; jager, m; warnecke, t; smoliner, c; stingel, k; leischker, ah	guideline of the german society for nutritional medicine (dgem) in cooperation with the geskes, the ake, the dgn and the dgge81	aktuelle ernahrungsmedizin	2013	10.1055/s-0033-1343317	1	1	NA	NA	NA	1_NA_NA_NA
tellez-zenteno, jf; jacinto-tinajero, jc; avila-funes, a; garcia-ramos, g; negrete-pulido, o; senties-madrid, h	guillain-barre syndrome. experience in a third level hospital	revista de investigacion clinica-clinical and translational investigation	2001	NA	0	NA	NA	NA	NA	NA_NA_NA_NA
ochoa-reparaz, j; kasper, lh	gut microbiome and the risk factors in central nervous system autoimmunity	febs letters	2014	10.1016/j.febslet.2014.09.024	2	1	b	a	NA	1_b_a_NA
ochoa-reparaz, j; kasper, lh	gut microbiome and the risk factors in central nervous system autoimmunity	febs letters	2014	10.1016/j.febslet.2014.09.024	2	1	b	NA	NA	1_b_NA_NA
ochoa-reparaz, j; kasper, lh	gut microbiome and the risk factors in central nervous system autoimmunity	febs letters	2014	10.1016/j.febslet.2014.09.024	2	1	NA	NA	NA	1_NA_NA_NA
zhu, w; dykstra, k; zhang, ll; xia, zq	gut microbiome as potential therapeutics in multiple sclerosis	current treatment options in neurology	2021	10.1007/s11940-021-00693-1	0	1	b	b	NA	1_b_b_NA
zhu, w; dykstra, k; zhang, ll; xia, zq	gut microbiome as potential therapeutics in multiple sclerosis	current treatment options in neurology	2021	10.1007/s11940-021-00693-1	0	1	b	NA	NA	1_b_NA_NA
zhu, w; dykstra, k; zhang, ll; xia, zq	gut microbiome as potential therapeutics in multiple sclerosis	current treatment options in neurology	2021	10.1007/s11940-021-00693-1	0	1	NA	NA	NA	1_NA_NA_NA
vuotto, c; battistini, l; caltagirone, c; borsellino, g	gut microbiota and disorders of the central nervous system	neuroscientist	2020	10.1177/1073858420918826	0	1	b	a	NA	1_b_a_NA
vuotto, c; battistini, l; caltagirone, c; borsellino, g	gut microbiota and disorders of the central nervous system	neuroscientist	2020	10.1177/1073858420918826	0	1	b	NA	NA	1_b_NA_NA
vuotto, c; battistini, l; caltagirone, c; borsellino, g	gut microbiota and disorders of the central nervous system	neuroscientist	2020	10.1177/1073858420918826	0	1	NA	NA	NA	1_NA_NA_NA
rinaldi, e; consonni, a; guidesi, e; elli, m; mantegazza, r; baggi, f	gut microbiota and probiotics: novel immune system modulators in myasthenia gravis?	annals of the new york academy of sciences	2018	10.1111/nyas.13567	0	1	b	c	NA	1_b_c_NA
rinaldi, e; consonni, a; guidesi, e; elli, m; mantegazza, r; baggi, f	gut microbiota and probiotics: novel immune system modulators in myasthenia gravis?	annals of the new york academy of sciences	2018	10.1111/nyas.13567	0	1	b	NA	NA	1_b_NA_NA
rinaldi, e; consonni, a; guidesi, e; elli, m; mantegazza, r; baggi, f	gut microbiota and probiotics: novel immune system modulators in myasthenia gravis?	annals of the new york academy of sciences	2018	10.1111/nyas.13567	0	1	NA	NA	NA	1_NA_NA_NA
moles, l; egimendia, a; osorio-querejeta, i; iparraguirre, l; alberro, a; suarez, j; sepulveda, l; castillo-trivino, t; munoz-culla, m; ramos-cabrer, p; otaegui, d	gut microbiota changes in experimental autoimmune encephalomyelitis and cuprizone mice models	acs chemical neuroscience	2021	10.1021/acschemneuro.0c00695	0	1	b	a	NA	1_b_a_NA
moles, l; egimendia, a; osorio-querejeta, i; iparraguirre, l; alberro, a; suarez, j; sepulveda, l; castillo-trivino, t; munoz-culla, m; ramos-cabrer, p; otaegui, d	gut microbiota changes in experimental autoimmune encephalomyelitis and cuprizone mice models	acs chemical neuroscience	2021	10.1021/acschemneuro.0c00695	0	1	b	NA	NA	1_b_NA_NA
moles, l; egimendia, a; osorio-querejeta, i; iparraguirre, l; alberro, a; suarez, j; sepulveda, l; castillo-trivino, t; munoz-culla, m; ramos-cabrer, p; otaegui, d	gut microbiota changes in experimental autoimmune encephalomyelitis and cuprizone mice models	acs chemical neuroscience	2021	10.1021/acschemneuro.0c00695	0	1	NA	NA	NA	1_NA_NA_NA
sauma, s; casaccia, p	gut-brain communication in demyelinating disorders	current opinion in neurobiology	2020	10.1016/j.conb.2020.01.005	0	1	b	b	NA	1_b_b_NA
sauma, s; casaccia, p	gut-brain communication in demyelinating disorders	current opinion in neurobiology	2020	10.1016/j.conb.2020.01.005	0	1	b	NA	NA	1_b_NA_NA
sauma, s; casaccia, p	gut-brain communication in demyelinating disorders	current opinion in neurobiology	2020	10.1016/j.conb.2020.01.005	0	1	NA	NA	NA	1_NA_NA_NA
fleck, ak; schuppan, d; wiendl, h; klotz, l	gut-cns-axis as possibility to modulate inflammatory disease activity-implications for multiple sclerosis	international journal of molecular sciences	2017	10.3390/ijms18071526	6	1	b	a	NA	1_b_a_NA
fleck, ak; schuppan, d; wiendl, h; klotz, l	gut-cns-axis as possibility to modulate inflammatory disease activity-implications for multiple sclerosis	international journal of molecular sciences	2017	10.3390/ijms18071526	6	1	b	NA	NA	1_b_NA_NA
fleck, ak; schuppan, d; wiendl, h; klotz, l	gut-cns-axis as possibility to modulate inflammatory disease activity-implications for multiple sclerosis	international journal of molecular sciences	2017	10.3390/ijms18071526	6	1	NA	NA	NA	1_NA_NA_NA
petra, ai; panagiotidou, s; hatziagelaki, e; stewart, jm; conti, p; theoharides, tc	gut-microbiota-brain axis and its effect on neuropsychiatric disorders with suspected immune dysregulation	clinical therapeutics	2015	10.1016/j.clinthera.2015.04.002	6	1	b	c	NA	1_b_c_NA
petra, ai; panagiotidou, s; hatziagelaki, e; stewart, jm; conti, p; theoharides, tc	gut-microbiota-brain axis and its effect on neuropsychiatric disorders with suspected immune dysregulation	clinical therapeutics	2015	10.1016/j.clinthera.2015.04.002	6	1	b	NA	NA	1_b_NA_NA
petra, ai; panagiotidou, s; hatziagelaki, e; stewart, jm; conti, p; theoharides, tc	gut-microbiota-brain axis and its effect on neuropsychiatric disorders with suspected immune dysregulation	clinical therapeutics	2015	10.1016/j.clinthera.2015.04.002	6	1	NA	NA	NA	1_NA_NA_NA
borja, ms; zhao, l; hammerson, b; tang, cr; yang, r; carson, n; fernando, g; liu, xq; budamagunta, ms; genest, j; shearer, gc; duclos, f; oda, mn	hdl-apoa-i exchange: rapid detection and association with atherosclerosis	plos one	2013	10.1371/journal.pone.0071541	0	NA	NA	NA	NA	NA_NA_NA_NA
slawta, jn; wilcox, ar; mccubbin, ja; nalle, dj; fox, sd; anderson, g	health behaviors, body composition, and coronary heart disease risk in women with multiple sclerosis	archives of physical medicine and rehabilitation	2003	10.1016/s0003-9993(03)00466-0	12	1	a	b	NA	1_a_b_NA
slawta, jn; wilcox, ar; mccubbin, ja; nalle, dj; fox, sd; anderson, g	health behaviors, body composition, and coronary heart disease risk in women with multiple sclerosis	archives of physical medicine and rehabilitation	2003	10.1016/s0003-9993(03)00466-0	12	1	a	NA	NA	1_a_NA_NA
slawta, jn; wilcox, ar; mccubbin, ja; nalle, dj; fox, sd; anderson, g	health behaviors, body composition, and coronary heart disease risk in women with multiple sclerosis	archives of physical medicine and rehabilitation	2003	10.1016/s0003-9993(03)00466-0	12	1	NA	NA	NA	1_NA_NA_NA
borlak, jt; welch, va	health implications of fatty-acids	arzneimittel-forschung/drug research	1994	NA	0	NA	NA	NA	NA	NA_NA_NA_NA
kamali, s; ahmadian, l; khajouei, r; bahaadinbeigy, k	health information needs of pregnant women: information sources, motives and barriers	health information and libraries journal	2018	10.1111/hir.12200	0	NA	NA	NA	NA	NA_NA_NA_NA
marck, ch; de livera, am; brown, cr; neate, sl; taylor, kl; weiland, tj; hadgkiss, ej; jelinek, ga	health outcomes and adherence to a healthy lifestyle after a multimodal intervention in people with multiple sclerosis: three year follow-up	plos one	2018	10.1371/journal.pone.0197759	5	1	a	a	a	1_a_a_a
marck, ch; de livera, am; brown, cr; neate, sl; taylor, kl; weiland, tj; hadgkiss, ej; jelinek, ga	health outcomes and adherence to a healthy lifestyle after a multimodal intervention in people with multiple sclerosis: three year follow-up	plos one	2018	10.1371/journal.pone.0197759	5	1	a	a	NA	1_a_a_NA
marck, ch; de livera, am; brown, cr; neate, sl; taylor, kl; weiland, tj; hadgkiss, ej; jelinek, ga	health outcomes and adherence to a healthy lifestyle after a multimodal intervention in people with multiple sclerosis: three year follow-up	plos one	2018	10.1371/journal.pone.0197759	5	1	a	NA	NA	1_a_NA_NA
marck, ch; de livera, am; brown, cr; neate, sl; taylor, kl; weiland, tj; hadgkiss, ej; jelinek, ga	health outcomes and adherence to a healthy lifestyle after a multimodal intervention in people with multiple sclerosis: three year follow-up	plos one	2018	10.1371/journal.pone.0197759	5	1	NA	NA	NA	1_NA_NA_NA
bae, j; lin, jms	healthcare utilization in myalgic encephalomyelitis/chronic fatigue syndrome (me/cfs): analysis of us ambulatory healthcare data, 2000-2009	frontiers in pediatrics	2019	10.3389/fped.2019.00185	0	NA	NA	NA	NA	NA_NA_NA_NA
kaufmann, she	heat-shock proteins and autoimmunity - a critical-appraisal	international archives of allergy and immunology	1994	10.1159/000236648	0	NA	NA	NA	NA	NA_NA_NA_NA
giacoppo, s; galuppo, m; calabro, rs; d'aleo, g; marra, a; sessa, e; bua, dg; potorti, ag; dugo, g; bramanti, p; mazzon, e	heavy metals and neurodegenerative diseases: an observational study	biological trace element research	2014	10.1007/s12011-014-0094-5	2	1	NA	NA	NA	1_NA_NA_NA
deon, m; garcia, mp; sitta, a; barschak, ag; coelho, dm; schimit, go; pigatto, m; jardim, lb; wajner, m; giugliani, r; vargas, cr	hexacosanoic and docosanoic acids plasma levels in patients with cerebral childhood and asymptomatic x-linked adrenoleukodystrophy: lorenzo's oil effect	metabolic brain disease	2008	10.1007/s11011-007-9079-9	0	NA	NA	NA	NA	NA_NA_NA_NA
cheli, vt; gonzalez, das; wan, qc; denaroso, g; wan, rs; rosenblum, sl; paez, pm	h-ferritin expression in astrocytes is necessary for proper oligodendrocyte development and myelination	glia	2021	10.1002/glia.24083	0	NA	NA	NA	NA	NA_NA_NA_NA
langley, mr; yoon, h; kim, hn; choi, ci; simon, w; kleppe, l; lanza, ir; lebrasseur, nk; matveyenko, a; scarisbrick, ia	high fat diet consumption results in mitochondrial dysfunction, oxidative stress, and oligodendrocyte loss in the central nervous system	biochimica et biophysica acta-molecular basis of disease	2020	10.1016/j.bbadis.2019.165630	2	1	b	d	NA	1_b_d_NA
langley, mr; yoon, h; kim, hn; choi, ci; simon, w; kleppe, l; lanza, ir; lebrasseur, nk; matveyenko, a; scarisbrick, ia	high fat diet consumption results in mitochondrial dysfunction, oxidative stress, and oligodendrocyte loss in the central nervous system	biochimica et biophysica acta-molecular basis of disease	2020	10.1016/j.bbadis.2019.165630	2	1	b	NA	NA	1_b_NA_NA
langley, mr; yoon, h; kim, hn; choi, ci; simon, w; kleppe, l; lanza, ir; lebrasseur, nk; matveyenko, a; scarisbrick, ia	high fat diet consumption results in mitochondrial dysfunction, oxidative stress, and oligodendrocyte loss in the central nervous system	biochimica et biophysica acta-molecular basis of disease	2020	10.1016/j.bbadis.2019.165630	2	1	NA	NA	NA	1_NA_NA_NA
timmermans, s; bogie, jfj; vanmierlo, t; lutjohann, d; stinissen, p; hellings, n; hendriks, jja	high fat diet exacerbates neuroinflammation in an animal model of multiple sclerosis by activation of the renin angiotensin system	journal of neuroimmune pharmacology	2014	10.1007/s11481-013-9502-4	24	1	b	d	NA	1_b_d_NA
timmermans, s; bogie, jfj; vanmierlo, t; lutjohann, d; stinissen, p; hellings, n; hendriks, jja	high fat diet exacerbates neuroinflammation in an animal model of multiple sclerosis by activation of the renin angiotensin system	journal of neuroimmune pharmacology	2014	10.1007/s11481-013-9502-4	24	1	b	NA	NA	1_b_NA_NA
timmermans, s; bogie, jfj; vanmierlo, t; lutjohann, d; stinissen, p; hellings, n; hendriks, jja	high fat diet exacerbates neuroinflammation in an animal model of multiple sclerosis by activation of the renin angiotensin system	journal of neuroimmune pharmacology	2014	10.1007/s11481-013-9502-4	24	1	NA	NA	NA	1_NA_NA_NA
neyestani, tr; hajifaraji, m; omidvar, n; eshraghian, mr; shariatzadeh, n; kalayi, a; gharavi, a; khalaji, n; haidari, h; zowghi, t; nikooyeh, b	high prevalence of vitamin d deficiency in school-age children in tehran, 2008: a red alert	public health nutrition	2012	10.1017/s1368980011000188	1	1	c	NA	NA	1_c_NA_NA
neyestani, tr; hajifaraji, m; omidvar, n; eshraghian, mr; shariatzadeh, n; kalayi, a; gharavi, a; khalaji, n; haidari, h; zowghi, t; nikooyeh, b	high prevalence of vitamin d deficiency in school-age children in tehran, 2008: a red alert	public health nutrition	2012	10.1017/s1368980011000188	1	1	NA	NA	NA	1_NA_NA_NA
simpson-yap, s; oddy, wh; taylor, b; lucas, rm; black, lj; ponsonby, al; blizzard, l; van der mei, i	high prudent diet factor score predicts lower relapse hazard in early multiple sclerosis	multiple sclerosis journal	2021	10.1177/1352458520943087	1	1	a	a	a	1_a_a_a
simpson-yap, s; oddy, wh; taylor, b; lucas, rm; black, lj; ponsonby, al; blizzard, l; van der mei, i	high prudent diet factor score predicts lower relapse hazard in early multiple sclerosis	multiple sclerosis journal	2021	10.1177/1352458520943087	1	1	a	a	NA	1_a_a_NA
simpson-yap, s; oddy, wh; taylor, b; lucas, rm; black, lj; ponsonby, al; blizzard, l; van der mei, i	high prudent diet factor score predicts lower relapse hazard in early multiple sclerosis	multiple sclerosis journal	2021	10.1177/1352458520943087	1	1	a	NA	NA	1_a_NA_NA
simpson-yap, s; oddy, wh; taylor, b; lucas, rm; black, lj; ponsonby, al; blizzard, l; van der mei, i	high prudent diet factor score predicts lower relapse hazard in early multiple sclerosis	multiple sclerosis journal	2021	10.1177/1352458520943087	1	1	NA	NA	NA	1_NA_NA_NA
huehnchen, p; boehmerle, w; endres, m	high salt diet ameliorates functional, electrophysiological and histological characteristics of murine spontaneous autoimmune polyneuropathy	neurobiology of disease	2019	10.1016/j.nbd.2018.11.017	2	1	b	a	NA	1_b_a_NA
huehnchen, p; boehmerle, w; endres, m	high salt diet ameliorates functional, electrophysiological and histological characteristics of murine spontaneous autoimmune polyneuropathy	neurobiology of disease	2019	10.1016/j.nbd.2018.11.017	2	1	b	NA	NA	1_b_NA_NA
huehnchen, p; boehmerle, w; endres, m	high salt diet ameliorates functional, electrophysiological and histological characteristics of murine spontaneous autoimmune polyneuropathy	neurobiology of disease	2019	10.1016/j.nbd.2018.11.017	2	1	NA	NA	NA	1_NA_NA_NA
jorg, s; kissel, j; manzel, a; kleinewietfeld, m; haghikia, a; gold, r; muller, dn; linker, ra	high salt drives th17 responses in experimental autoimmune encephalomyelitis without impacting myeloid dendritic cells	experimental neurology	2016	10.1016/j.expneurol.2016.03.010	13	1	b	a	NA	1_b_a_NA
jorg, s; kissel, j; manzel, a; kleinewietfeld, m; haghikia, a; gold, r; muller, dn; linker, ra	high salt drives th17 responses in experimental autoimmune encephalomyelitis without impacting myeloid dendritic cells	experimental neurology	2016	10.1016/j.expneurol.2016.03.010	13	1	b	NA	NA	1_b_NA_NA
jorg, s; kissel, j; manzel, a; kleinewietfeld, m; haghikia, a; gold, r; muller, dn; linker, ra	high salt drives th17 responses in experimental autoimmune encephalomyelitis without impacting myeloid dendritic cells	experimental neurology	2016	10.1016/j.expneurol.2016.03.010	13	1	NA	NA	NA	1_NA_NA_NA
cappa, m; bertini, e; delbalzo, p; cambiaso, p; dibiase, a; salvati, s	high-dose immunoglobulin iv treatment in adrenoleukodystrophy	journal of neurology neurosurgery and psychiatry	1994	10.1136/jnnp.57.suppl.69	0	NA	NA	NA	NA	NA_NA_NA_NA
black, lj; zhao, y; peng, yc; sherriff, jl; lucas, rm; van der mei, i; pereira, g	higher fish consumption and lower risk of central nervous system demyelination	european journal of clinical nutrition	2020	10.1038/s41430-019-0476-z	2	1	a	a	a	1_a_a_a
black, lj; zhao, y; peng, yc; sherriff, jl; lucas, rm; van der mei, i; pereira, g	higher fish consumption and lower risk of central nervous system demyelination	european journal of clinical nutrition	2020	10.1038/s41430-019-0476-z	2	1	a	a	NA	1_a_a_NA
black, lj; zhao, y; peng, yc; sherriff, jl; lucas, rm; van der mei, i; pereira, g	higher fish consumption and lower risk of central nervous system demyelination	european journal of clinical nutrition	2020	10.1038/s41430-019-0476-z	2	1	a	NA	NA	1_a_NA_NA
black, lj; zhao, y; peng, yc; sherriff, jl; lucas, rm; van der mei, i; pereira, g	higher fish consumption and lower risk of central nervous system demyelination	european journal of clinical nutrition	2020	10.1038/s41430-019-0476-z	2	1	NA	NA	NA	1_NA_NA_NA
hoare, s; lithander, f; van der mei, i; ponsonby, al; lucas, r	higher intake of omega-3 polyunsaturated fatty acids is associated with a decreased risk of a first clinical diagnosis of central nervous system demyelination: results from the ausimmune study	multiple sclerosis journal	2016	10.1177/1352458515604380	31	1	a	a	a	1_a_a_a
hoare, s; lithander, f; van der mei, i; ponsonby, al; lucas, r	higher intake of omega-3 polyunsaturated fatty acids is associated with a decreased risk of a first clinical diagnosis of central nervous system demyelination: results from the ausimmune study	multiple sclerosis journal	2016	10.1177/1352458515604380	31	1	a	a	NA	1_a_a_NA
hoare, s; lithander, f; van der mei, i; ponsonby, al; lucas, r	higher intake of omega-3 polyunsaturated fatty acids is associated with a decreased risk of a first clinical diagnosis of central nervous system demyelination: results from the ausimmune study	multiple sclerosis journal	2016	10.1177/1352458515604380	31	1	a	NA	NA	1_a_NA_NA
hoare, s; lithander, f; van der mei, i; ponsonby, al; lucas, r	higher intake of omega-3 polyunsaturated fatty acids is associated with a decreased risk of a first clinical diagnosis of central nervous system demyelination: results from the ausimmune study	multiple sclerosis journal	2016	10.1177/1352458515604380	31	1	NA	NA	NA	1_NA_NA_NA
black, lj; bowe, gs; pereira, g; lucas, rm; dear, k; van der mei, i; sherriff, jl; chapman, c; coulthard, a; dwyer, t; kilpatrick, t; lucas, r; mcmichael, t; pender, mp; ponsonby, al; taylor, b; valery, p; williams, d	higher non-processed red meat consumption is associated with a reduced risk of central nervous system demyelination	frontiers in neurology	2019	10.3389/fneur.2019.00125	4	1	a	a	a	1_a_a_a
black, lj; bowe, gs; pereira, g; lucas, rm; dear, k; van der mei, i; sherriff, jl; chapman, c; coulthard, a; dwyer, t; kilpatrick, t; lucas, r; mcmichael, t; pender, mp; ponsonby, al; taylor, b; valery, p; williams, d	higher non-processed red meat consumption is associated with a reduced risk of central nervous system demyelination	frontiers in neurology	2019	10.3389/fneur.2019.00125	4	1	a	a	NA	1_a_a_NA
black, lj; bowe, gs; pereira, g; lucas, rm; dear, k; van der mei, i; sherriff, jl; chapman, c; coulthard, a; dwyer, t; kilpatrick, t; lucas, r; mcmichael, t; pender, mp; ponsonby, al; taylor, b; valery, p; williams, d	higher non-processed red meat consumption is associated with a reduced risk of central nervous system demyelination	frontiers in neurology	2019	10.3389/fneur.2019.00125	4	1	a	NA	NA	1_a_NA_NA
black, lj; bowe, gs; pereira, g; lucas, rm; dear, k; van der mei, i; sherriff, jl; chapman, c; coulthard, a; dwyer, t; kilpatrick, t; lucas, r; mcmichael, t; pender, mp; ponsonby, al; taylor, b; valery, p; williams, d	higher non-processed red meat consumption is associated with a reduced risk of central nervous system demyelination	frontiers in neurology	2019	10.3389/fneur.2019.00125	4	1	NA	NA	NA	1_NA_NA_NA
filiberti, r; giacosa, a; brignoli, o	high-risk subjects for vitamin deficiency	european journal of cancer prevention	1997	10.1097/00008469-199703001-00008	0	NA	NA	NA	NA	NA_NA_NA_NA
heras-garvin, a; refolo, v; reindl, m; wenning, gk; stefanova, n	high-salt diet does not boost neuroinflammation and neurodegeneration in a model of alpha-synucleinopathy	journal of neuroinflammation	2020	10.1186/s12974-020-1714-y	0	1	b	a	NA	1_b_a_NA
heras-garvin, a; refolo, v; reindl, m; wenning, gk; stefanova, n	high-salt diet does not boost neuroinflammation and neurodegeneration in a model of alpha-synucleinopathy	journal of neuroinflammation	2020	10.1186/s12974-020-1714-y	0	1	b	NA	NA	1_b_NA_NA
heras-garvin, a; refolo, v; reindl, m; wenning, gk; stefanova, n	high-salt diet does not boost neuroinflammation and neurodegeneration in a model of alpha-synucleinopathy	journal of neuroinflammation	2020	10.1186/s12974-020-1714-y	0	1	NA	NA	NA	1_NA_NA_NA
na, sy; janakiraman, m; leliavski, a; krishnamoorthy, g	high-salt diet suppresses autoimmune demyelination by regulating the blood-brain barrier permeability	proceedings of the national academy of sciences of the united states of america	2021	10.1073/pnas.2025944118	0	1	b	a	NA	1_b_a_NA
na, sy; janakiraman, m; leliavski, a; krishnamoorthy, g	high-salt diet suppresses autoimmune demyelination by regulating the blood-brain barrier permeability	proceedings of the national academy of sciences of the united states of america	2021	10.1073/pnas.2025944118	0	1	b	NA	NA	1_b_NA_NA
na, sy; janakiraman, m; leliavski, a; krishnamoorthy, g	high-salt diet suppresses autoimmune demyelination by regulating the blood-brain barrier permeability	proceedings of the national academy of sciences of the united states of america	2021	10.1073/pnas.2025944118	0	1	NA	NA	NA	1_NA_NA_NA
pun, twc; odrobina, e; xu, qg; lam, tyj; munro, ca; midha, r; stanisz, gj	histological and magnetic resonance analysis of sciatic nerves in the tellurium model of neuropathy	journal of the peripheral nervous system	2005	10.1111/j.1085-9489.2005.10107.x	1	NA	NA	NA	NA	NA_NA_NA_NA
mokhtarzade, m; shamsi, mm; abolhasani, m; bakhshi, b; sahraian, ma; quinn, ls; negaresh, r	home-based exercise training influences gut bacterial levels in multiple sclerosis	complementary therapies in clinical practice	2021	10.1016/j.ctcp.2021.101463	0	NA	NA	NA	NA	NA_NA_NA_NA
zhou, xy; singh, s; baumann, r; barba, p; landefeld, j; casaccia, p; sand, ik; xia, zq; weiner, h; chitnis, t; chandran, s; connick, p; otaegui, d; castillo-trivino, t; caillier, sj; santaniello, a; ackermann, g; humphrey, g; negrotto, l; farez, m; hohlfeld, r; probstel, ak; jia, xm; graves, j; bar-or, a; oksenberg, jr; gelfand, j; wilson, mr; crabtree, e; zamvil, ss; correale, j; cree, bac; haus…	household paired design reduces variance and increases power in multi-city gut microbiome study in multiple sclerosis	multiple sclerosis journal	2021	10.1177/1352458520924594	1	1	a	b	NA	1_a_b_NA
zhou, xy; singh, s; baumann, r; barba, p; landefeld, j; casaccia, p; sand, ik; xia, zq; weiner, h; chitnis, t; chandran, s; connick, p; otaegui, d; castillo-trivino, t; caillier, sj; santaniello, a; ackermann, g; humphrey, g; negrotto, l; farez, m; hohlfeld, r; probstel, ak; jia, xm; graves, j; bar-or, a; oksenberg, jr; gelfand, j; wilson, mr; crabtree, e; zamvil, ss; correale, j; cree, bac; haus…	household paired design reduces variance and increases power in multi-city gut microbiome study in multiple sclerosis	multiple sclerosis journal	2021	10.1177/1352458520924594	1	1	a	NA	NA	1_a_NA_NA
zhou, xy; singh, s; baumann, r; barba, p; landefeld, j; casaccia, p; sand, ik; xia, zq; weiner, h; chitnis, t; chandran, s; connick, p; otaegui, d; castillo-trivino, t; caillier, sj; santaniello, a; ackermann, g; humphrey, g; negrotto, l; farez, m; hohlfeld, r; probstel, ak; jia, xm; graves, j; bar-or, a; oksenberg, jr; gelfand, j; wilson, mr; crabtree, e; zamvil, ss; correale, j; cree, bac; haus…	household paired design reduces variance and increases power in multi-city gut microbiome study in multiple sclerosis	multiple sclerosis journal	2021	10.1177/1352458520924594	1	1	NA	NA	NA	1_NA_NA_NA
pateman, k; cockburn, n; campbell, j; ford, pj	how do australians living with ms experience oral health and accessing dental care? a focus group study	community dentistry and oral epidemiology	2017	10.1111/cdoe.12263	0	NA	NA	NA	NA	NA_NA_NA_NA
tanyildiz, hg; yesil, s; okur, i; yuksel, d; sahin, g	how does b-12 deficiency of mothers affect their infants?	iranian journal of pediatrics	2017	10.5812/ijp.12898	0	NA	NA	NA	NA	NA_NA_NA_NA
larner, aj	how does garlic exert its hypocholesterolemic action - the tellurium hypothesis	medical hypotheses	1995	10.1016/0306-9877(95)90183-3	0	NA	NA	NA	NA	NA_NA_NA_NA
anderson, g; maes, m	how immune-inflammatory processes link cns and psychiatric disorders: classification and treatment implications	cns & neurological disorders-drug targets	2017	10.2174/1871527315666161122144659	1	1	b	c	NA	1_b_c_NA
anderson, g; maes, m	how immune-inflammatory processes link cns and psychiatric disorders: classification and treatment implications	cns & neurological disorders-drug targets	2017	10.2174/1871527315666161122144659	1	1	b	NA	NA	1_b_NA_NA
anderson, g; maes, m	how immune-inflammatory processes link cns and psychiatric disorders: classification and treatment implications	cns & neurological disorders-drug targets	2017	10.2174/1871527315666161122144659	1	1	NA	NA	NA	1_NA_NA_NA
karnoe, a; pedersen, lm; karlsen, s; boesen, f; skovgaard, l; kayser, l	how people with multiple sclerosis experience the influence of nutrition and lifestyle factors on the disease	disability and rehabilitation	2020	10.1080/09638288.2019.1602675	2	1	a	b	NA	1_a_b_NA
karnoe, a; pedersen, lm; karlsen, s; boesen, f; skovgaard, l; kayser, l	how people with multiple sclerosis experience the influence of nutrition and lifestyle factors on the disease	disability and rehabilitation	2020	10.1080/09638288.2019.1602675	2	1	a	NA	NA	1_a_NA_NA
karnoe, a; pedersen, lm; karlsen, s; boesen, f; skovgaard, l; kayser, l	how people with multiple sclerosis experience the influence of nutrition and lifestyle factors on the disease	disability and rehabilitation	2020	10.1080/09638288.2019.1602675	2	1	NA	NA	NA	1_NA_NA_NA
muszer, m; noszczynska, m; kasperkiewicz, k; skurnik, m	human microbiome: when a friend becomes an enemy	archivum immunologiae et therapiae experimentalis	2015	10.1007/s00005-015-0332-3	1	1	b	c	NA	1_b_c_NA
muszer, m; noszczynska, m; kasperkiewicz, k; skurnik, m	human microbiome: when a friend becomes an enemy	archivum immunologiae et therapiae experimentalis	2015	10.1007/s00005-015-0332-3	1	1	b	NA	NA	1_b_NA_NA
muszer, m; noszczynska, m; kasperkiewicz, k; skurnik, m	human microbiome: when a friend becomes an enemy	archivum immunologiae et therapiae experimentalis	2015	10.1007/s00005-015-0332-3	1	1	NA	NA	NA	1_NA_NA_NA
marcuello, a; martinez-redondo, d; dahmani, y; casajus, ja; ruiz-pesini, e; montoya, j; lopez-perez, mj; diez-sanchez, c	human mitochondrial variants influence on oxygen consumption	mitochondrion	2009	10.1016/j.mito.2008.10.002	0	NA	NA	NA	NA	NA_NA_NA_NA
foster, rg; roenneberg, t	human responses to the geophysical daily, annual and lunar cycles	current biology	2008	10.1016/j.cub.2008.07.003	0	NA	NA	NA	NA	NA_NA_NA_NA
jablonski, ng; chaplin, g	human skin pigmentation, migration and disease susceptibility	philosophical transactions of the royal society b-biological sciences	2012	10.1098/rstb.2011.0308	1	1	c	NA	NA	1_c_NA_NA
jablonski, ng; chaplin, g	human skin pigmentation, migration and disease susceptibility	philosophical transactions of the royal society b-biological sciences	2012	10.1098/rstb.2011.0308	1	1	NA	NA	NA	1_NA_NA_NA
zhang, aq; lee, syr; truneh, m; everett, ml; parker, w	human whey promotes sessile bacterial growth, whereas alternative sources of infant nutrition promote planktonic growth	current nutrition & food science	2012	10.2174/157340112802651185	0	NA	NA	NA	NA	NA_NA_NA_NA
tsunoda, i; mccright, ij; kuang, lq; zurbriggen, a; fujinami, rs	hydrocephalus in mice infected with a theiler's murine encephalomyelitis virus variant	journal of neuropathology and experimental neurology	1997	10.1097/00005072-199712000-00005	1	1	b	d	NA	1_b_d_NA
tsunoda, i; mccright, ij; kuang, lq; zurbriggen, a; fujinami, rs	hydrocephalus in mice infected with a theiler's murine encephalomyelitis virus variant	journal of neuropathology and experimental neurology	1997	10.1097/00005072-199712000-00005	1	1	b	NA	NA	1_b_NA_NA
tsunoda, i; mccright, ij; kuang, lq; zurbriggen, a; fujinami, rs	hydrocephalus in mice infected with a theiler's murine encephalomyelitis virus variant	journal of neuropathology and experimental neurology	1997	10.1097/00005072-199712000-00005	1	1	NA	NA	NA	1_NA_NA_NA
rook, gaw	hygiene hypothesis and autoimmune diseases	clinical reviews in allergy & immunology	2012	10.1007/s12016-011-8285-8	3	NA	NA	NA	NA	NA_NA_NA_NA
murdaca, g; greco, m; borro, m; gangemi, s	hygiene hypothesis and autoimmune diseases: a narrative review of clinical evidences and mechanisms	autoimmunity reviews	2021	10.1016/j.autrev.2021.102845	0	1	b	c	NA	1_b_c_NA
murdaca, g; greco, m; borro, m; gangemi, s	hygiene hypothesis and autoimmune diseases: a narrative review of clinical evidences and mechanisms	autoimmunity reviews	2021	10.1016/j.autrev.2021.102845	0	1	b	NA	NA	1_b_NA_NA
murdaca, g; greco, m; borro, m; gangemi, s	hygiene hypothesis and autoimmune diseases: a narrative review of clinical evidences and mechanisms	autoimmunity reviews	2021	10.1016/j.autrev.2021.102845	0	1	NA	NA	NA	1_NA_NA_NA
james, pb	hyperbaric oxygenation in fluid microembolism	neurological research	2007	10.1179/016164107x181789	0	NA	NA	NA	NA	NA_NA_NA_NA
meehan, tf; vanhooke, j; prahl, j; deluca, hf	hypercalcemia produced by parathyroid hormone suppresses experimental autoimmune encephalomyelitis in female but not male mice	archives of biochemistry and biophysics	2005	10.1016/j.abb.2005.08.011	2	1	c	b	NA	1_c_b_NA
meehan, tf; vanhooke, j; prahl, j; deluca, hf	hypercalcemia produced by parathyroid hormone suppresses experimental autoimmune encephalomyelitis in female but not male mice	archives of biochemistry and biophysics	2005	10.1016/j.abb.2005.08.011	2	1	c	NA	NA	1_c_NA_NA
meehan, tf; vanhooke, j; prahl, j; deluca, hf	hypercalcemia produced by parathyroid hormone suppresses experimental autoimmune encephalomyelitis in female but not male mice	archives of biochemistry and biophysics	2005	10.1016/j.abb.2005.08.011	2	1	NA	NA	NA	1_NA_NA_NA
deisenhammer, f; balogh, d; grubwieser, g; pohl, p	hypermetabolism in multiple sclerosis patients	european journal of neurology	1997	10.1111/j.1468-1331.1997.tb00359.x	1	NA	NA	NA	NA	NA_NA_NA_NA
ruhrmann, s; ewing, e; piket, e; kular, l; lorenzi, jcc; fernandes, sj; morikawa, h; aeinehband, s; sayols-baixeras, s; aslibekyan, s; absher, dm; arnett, dk; tegner, j; gomez-cabrero, d; piehl, f; jagodic, m	hypermethylation of mir21 in cd4+t cells from patients with relapsing-remitting multiple sclerosis associates with lower mirna-21 levels and concomitant up-regulation of its target genes	multiple sclerosis journal	2018	10.1177/1352458517721356	0	NA	NA	NA	NA	NA_NA_NA_NA
procopio, d; mascaro, i; ferraro, s; ceravolo, f; moricca, mt; salpietro, v; polizzi, a; ruggieri, m; bonapace, g; concolino, d	hyperphenylalaninemia: from diagnosis to therapy	journal of pediatric biochemistry	2016	10.1055/s-0036-1582237	0	NA	NA	NA	NA	NA_NA_NA_NA
schneider, a; araujo, gw; trajkovic, k; herrmann, mm; merkler, d; mandelkow, em; weissert, r; simons, m	hyperphosphorylation and aggregation of tau in experimental autoimmune encephalomyelitis	journal of biological chemistry	2004	10.1074/jbc.m409954200	0	2	a	NA	NA	2_a_NA_NA
schneider, a; araujo, gw; trajkovic, k; herrmann, mm; merkler, d; mandelkow, em; weissert, r; simons, m	hyperphosphorylation and aggregation of tau in experimental autoimmune encephalomyelitis	journal of biological chemistry	2004	10.1074/jbc.m409954200	0	2	NA	NA	NA	2_NA_NA_NA
wang, lx; cai, rw; lv, gr; huang, zy; wang, zh	hypoxia during pregnancy in rats leads to the changes of the cerebral white matter in adult offspring	biochemical and biophysical research communications	2010	10.1016/j.bbrc.2010.04.114	0	NA	NA	NA	NA	NA_NA_NA_NA
walsh, j; jenkins, re; wong, m; olayanju, a; powell, h; copple, i; o'neill, pm; goldring, cep; kitteringham, nr; park, bk	identification and quantification of the basal and inducible nrf2-dependent proteomes in mouse liver: biochemical, pharmacological and toxicological implications	journal of proteomics	2014	10.1016/j.jprot.2014.05.007	0	NA	NA	NA	NA	NA_NA_NA_NA
van rensburg, sj; peeters, av; van toorn, r; schoeman, j; moremi, ke; van heerden, cj; kotze, mj	identification of an iron-responsive subtype in two children diagnosed with relapsing-remitting multiple sclerosis using whole exome sequencing	molecular genetics and metabolism reports	2019	10.1016/j.ymgmr.2019.100465	2	1	a	b	NA	1_a_b_NA
van rensburg, sj; peeters, av; van toorn, r; schoeman, j; moremi, ke; van heerden, cj; kotze, mj	identification of an iron-responsive subtype in two children diagnosed with relapsing-remitting multiple sclerosis using whole exome sequencing	molecular genetics and metabolism reports	2019	10.1016/j.ymgmr.2019.100465	2	1	a	NA	NA	1_a_NA_NA
van rensburg, sj; peeters, av; van toorn, r; schoeman, j; moremi, ke; van heerden, cj; kotze, mj	identification of an iron-responsive subtype in two children diagnosed with relapsing-remitting multiple sclerosis using whole exome sequencing	molecular genetics and metabolism reports	2019	10.1016/j.ymgmr.2019.100465	2	1	NA	NA	NA	1_NA_NA_NA
senger, s; maurano, f; mazzeo, mf; gaita, m; fierro, o; david, cs; troncone, r; auricchio, s; siciliano, ra; rossi, m	identification of immunodominant epitopes of alpha-gliadin in hla-dq8 transgenic mice following oral immunization	journal of immunology	2005	10.4049/jimmunol.175.12.8087	0	NA	NA	NA	NA	NA_NA_NA_NA
walzer, c; url, a; robert, n; kubber-heiss, a; nowotny, n; schmidt, p	idiopathic acute onset myelopathy in cheetah (acinonyx jubatus) cubs	journal of zoo and wildlife medicine	2003	10.1638/1042-7260(2003)34[0036:IAOMIC]2.0.CO;2	1	2	b	NA	NA	2_b_NA_NA
walzer, c; url, a; robert, n; kubber-heiss, a; nowotny, n; schmidt, p	idiopathic acute onset myelopathy in cheetah (acinonyx jubatus) cubs	journal of zoo and wildlife medicine	2003	10.1638/1042-7260(2003)34[0036:IAOMIC]2.0.CO;2	1	2	NA	NA	NA	2_NA_NA_NA
pakarinen, m; kuusanmaki, p; halttunen, j	ileal nutritional function after one-stage orthotopic ileum transplantation in the growing pig: reversal of lethal short bowel syndrome	journal of pediatric surgery	1996	10.1016/s0022-3468(96)90675-2	0	NA	NA	NA	NA	NA_NA_NA_NA
procaccini, e; chianelli, m; pantano, p; signore, a	imaging of autoimmune diseases	quarterly journal of nuclear medicine	1999	NA	0	NA	NA	NA	NA	NA_NA_NA_NA
becker, m; masterson, k; delavelle, j; viallon, m; vargas, mi; becker, cd	imaging of the optic nerve	european journal of radiology	2010	10.1016/j.ejrad.2009.09.029	0	NA	NA	NA	NA	NA_NA_NA_NA
chen, mk; guilarte, tr	imaging the peripheral benzodiazepine receptor response in central nervous system demyelination and remyelination	toxicological sciences	2006	10.1093/toxsci/kfj172	1	2	NA	NA	NA	2_NA_NA_NA
platten, m; wick, w; opitz, c	immune modulation by tryptophan metabolism: relevance for autoimmune and tumor diseases	deutsche medizinische wochenschrift	2013	10.1055/s-0033-1343222	0	NA	NA	NA	NA	NA_NA_NA_NA
esquifino, ai; cano, p; jimenez-ortega, v; fernandez-mateos, mp; cardinali, dp	immune response after experimental allergic encephalomyelitis in rats subjected to calorie restriction	journal of neuroinflammation	2007	10.1186/1742-2094-4-6	17	1	b	b	NA	1_b_b_NA
esquifino, ai; cano, p; jimenez-ortega, v; fernandez-mateos, mp; cardinali, dp	immune response after experimental allergic encephalomyelitis in rats subjected to calorie restriction	journal of neuroinflammation	2007	10.1186/1742-2094-4-6	17	1	b	NA	NA	1_b_NA_NA
esquifino, ai; cano, p; jimenez-ortega, v; fernandez-mateos, mp; cardinali, dp	immune response after experimental allergic encephalomyelitis in rats subjected to calorie restriction	journal of neuroinflammation	2007	10.1186/1742-2094-4-6	17	1	NA	NA	NA	1_NA_NA_NA
afek, a; george, j; gilburd, b; rauova, l; goldberg, i; kopolovic, j; harats, d; shoenfeld, y	immunization of low-density lipoprotein receptor deficient (ldl-rd) mice with heat shock protein 65 (hsp-65) promotes early atherosclerosis	journal of autoimmunity	2000	10.1006/jaut.1999.0351	0	NA	NA	NA	NA	NA_NA_NA_NA
gershteyn, im; burov, aa; miao, by; morais, vh; ferreira, lmr	immunodietica: interrogating the role of diet in autoimmune disease	international immunology	2020	10.1093/intimm/dxaa054	0	1	b	a	NA	1_b_a_NA
gershteyn, im; burov, aa; miao, by; morais, vh; ferreira, lmr	immunodietica: interrogating the role of diet in autoimmune disease	international immunology	2020	10.1093/intimm/dxaa054	0	1	b	NA	NA	1_b_NA_NA
gershteyn, im; burov, aa; miao, by; morais, vh; ferreira, lmr	immunodietica: interrogating the role of diet in autoimmune disease	international immunology	2020	10.1093/intimm/dxaa054	0	1	NA	NA	NA	1_NA_NA_NA
saresella, m; mendozzi, l; rossi, v; mazzali, f; piancone, f; larosa, f; marventano, i; caputo, d; felis, ge; clerici, m	immunological and clinical effect of diet modulation of the gut microbiome in multiple sclerosis patients: a pilot study	frontiers in immunology	2017	10.3389/fimmu.2017.01391	19	1	b	b	NA	1_b_b_NA
saresella, m; mendozzi, l; rossi, v; mazzali, f; piancone, f; larosa, f; marventano, i; caputo, d; felis, ge; clerici, m	immunological and clinical effect of diet modulation of the gut microbiome in multiple sclerosis patients: a pilot study	frontiers in immunology	2017	10.3389/fimmu.2017.01391	19	1	b	NA	NA	1_b_NA_NA
saresella, m; mendozzi, l; rossi, v; mazzali, f; piancone, f; larosa, f; marventano, i; caputo, d; felis, ge; clerici, m	immunological and clinical effect of diet modulation of the gut microbiome in multiple sclerosis patients: a pilot study	frontiers in immunology	2017	10.3389/fimmu.2017.01391	19	1	NA	NA	NA	1_NA_NA_NA
sheikh, mh; henson, sm; loiola, ra; mercurio, s; colamatteo, a; maniscalco, gt; de rosa, v; mcarthur, s; solito, e	immuno-metabolic impact of the multiple sclerosis patients' sera on endothelial cells of the blood-brain barrier	journal of neuroinflammation	2020	10.1186/s12974-020-01810-8	0	1	b	b	NA	1_b_b_NA
sheikh, mh; henson, sm; loiola, ra; mercurio, s; colamatteo, a; maniscalco, gt; de rosa, v; mcarthur, s; solito, e	immuno-metabolic impact of the multiple sclerosis patients' sera on endothelial cells of the blood-brain barrier	journal of neuroinflammation	2020	10.1186/s12974-020-01810-8	0	1	b	NA	NA	1_b_NA_NA
sheikh, mh; henson, sm; loiola, ra; mercurio, s; colamatteo, a; maniscalco, gt; de rosa, v; mcarthur, s; solito, e	immuno-metabolic impact of the multiple sclerosis patients' sera on endothelial cells of the blood-brain barrier	journal of neuroinflammation	2020	10.1186/s12974-020-01810-8	0	1	NA	NA	NA	1_NA_NA_NA
de candia, p; de rosa, v; gigantino, v; botti, g; ceriello, a; matarese, g	immunometabolism of human autoimmune diseases: from metabolites to extracellular vesicles	febs letters	2017	10.1002/1873-3468.12733	0	1	b	b	NA	1_b_b_NA
de candia, p; de rosa, v; gigantino, v; botti, g; ceriello, a; matarese, g	immunometabolism of human autoimmune diseases: from metabolites to extracellular vesicles	febs letters	2017	10.1002/1873-3468.12733	0	1	b	NA	NA	1_b_NA_NA
de candia, p; de rosa, v; gigantino, v; botti, g; ceriello, a; matarese, g	immunometabolism of human autoimmune diseases: from metabolites to extracellular vesicles	febs letters	2017	10.1002/1873-3468.12733	0	1	NA	NA	NA	1_NA_NA_NA
morshedi, m; hashemi, r; moazzen, s; sahebkar, a; hosseinifard, es	immunomodulatory and anti-inflammatory effects of probiotics in multiple sclerosis: a systematic review	journal of neuroinflammation	2019	10.1186/s12974-019-1611-4	0	1	b	c	NA	1_b_c_NA
morshedi, m; hashemi, r; moazzen, s; sahebkar, a; hosseinifard, es	immunomodulatory and anti-inflammatory effects of probiotics in multiple sclerosis: a systematic review	journal of neuroinflammation	2019	10.1186/s12974-019-1611-4	0	1	b	NA	NA	1_b_NA_NA
morshedi, m; hashemi, r; moazzen, s; sahebkar, a; hosseinifard, es	immunomodulatory and anti-inflammatory effects of probiotics in multiple sclerosis: a systematic review	journal of neuroinflammation	2019	10.1186/s12974-019-1611-4	0	1	NA	NA	NA	1_NA_NA_NA
gruter, t; blusch, a; motte, j; sgodzai, m; bachir, h; klimas, r; ambrosius, b; gold, r; ellrichmann, g; pitarokoili, k	immunomodulatory and anti-oxidative effect of the direct trpv1 receptor agonist capsaicin on schwann cells	journal of neuroinflammation	2020	10.1186/s12974-020-01821-5	0	1	b	a	NA	1_b_a_NA
gruter, t; blusch, a; motte, j; sgodzai, m; bachir, h; klimas, r; ambrosius, b; gold, r; ellrichmann, g; pitarokoili, k	immunomodulatory and anti-oxidative effect of the direct trpv1 receptor agonist capsaicin on schwann cells	journal of neuroinflammation	2020	10.1186/s12974-020-01821-5	0	1	b	NA	NA	1_b_NA_NA
gruter, t; blusch, a; motte, j; sgodzai, m; bachir, h; klimas, r; ambrosius, b; gold, r; ellrichmann, g; pitarokoili, k	immunomodulatory and anti-oxidative effect of the direct trpv1 receptor agonist capsaicin on schwann cells	journal of neuroinflammation	2020	10.1186/s12974-020-01821-5	0	1	NA	NA	NA	1_NA_NA_NA
rezapour-firouzi, s; arefhosseini, sr; mehdi, f; mehrangiz, em; baradaran, b; sadeghihokmabad, e; mostafaei, s; fazljou, smb; torbati, ma; sanaie, s; zamani, f	immunomodulatory and therapeutic effects of hot-nature diet and co-supplemented hemp seed, evening primrose oils intervention in multiple sclerosis patients	complementary therapies in medicine	2013	10.1016/j.ctim.2013.06.006	11	1	a	a	b	1_a_a_b
rezapour-firouzi, s; arefhosseini, sr; mehdi, f; mehrangiz, em; baradaran, b; sadeghihokmabad, e; mostafaei, s; fazljou, smb; torbati, ma; sanaie, s; zamani, f	immunomodulatory and therapeutic effects of hot-nature diet and co-supplemented hemp seed, evening primrose oils intervention in multiple sclerosis patients	complementary therapies in medicine	2013	10.1016/j.ctim.2013.06.006	11	1	a	a	NA	1_a_a_NA
rezapour-firouzi, s; arefhosseini, sr; mehdi, f; mehrangiz, em; baradaran, b; sadeghihokmabad, e; mostafaei, s; fazljou, smb; torbati, ma; sanaie, s; zamani, f	immunomodulatory and therapeutic effects of hot-nature diet and co-supplemented hemp seed, evening primrose oils intervention in multiple sclerosis patients	complementary therapies in medicine	2013	10.1016/j.ctim.2013.06.006	11	1	a	NA	NA	1_a_NA_NA
rezapour-firouzi, s; arefhosseini, sr; mehdi, f; mehrangiz, em; baradaran, b; sadeghihokmabad, e; mostafaei, s; fazljou, smb; torbati, ma; sanaie, s; zamani, f	immunomodulatory and therapeutic effects of hot-nature diet and co-supplemented hemp seed, evening primrose oils intervention in multiple sclerosis patients	complementary therapies in medicine	2013	10.1016/j.ctim.2013.06.006	11	1	NA	NA	NA	1_NA_NA_NA
nosadini, m; sartori, s; sharma, s; dale, rc	immunotherapeutics in pediatric autoimmune central nervous system disease: agents and mechanisms	seminars in pediatric neurology	2017	10.1016/j.spen.2017.08.002	0	NA	NA	NA	NA	NA_NA_NA_NA
mouzaki, a; tselios, t; papathanassopoulos, p; matsoukas, i; chatzantoni, k	immunotherapy for multiple sclerosis: basic insights for new clinical strategies	current neurovascular research	2004	10.2174/1567202043362180	0	NA	NA	NA	NA	NA_NA_NA_NA
abiri, b; vafa, m	impact of coenzyme q10 on inflammatory biomarkers and its role in future therapeutic strategies	clinical nutrition espen	2021	10.1016/j.clnesp.2021.04.005	0	NA	NA	NA	NA	NA_NA_NA_NA
hammer, a; schliep, a; jorg, s; haghikia, a; gold, r; kleinewietfeld, m; muller, dn; linker, ra	impact of combined sodium chloride and saturated long-chain fatty acid challenge on the differentiation of t helper cells in neuroinflammation	journal of neuroinflammation	2017	10.1186/s12974-017-0954-y	9	1	b	a	NA	1_b_a_NA
hammer, a; schliep, a; jorg, s; haghikia, a; gold, r; kleinewietfeld, m; muller, dn; linker, ra	impact of combined sodium chloride and saturated long-chain fatty acid challenge on the differentiation of t helper cells in neuroinflammation	journal of neuroinflammation	2017	10.1186/s12974-017-0954-y	9	1	b	NA	NA	1_b_NA_NA
hammer, a; schliep, a; jorg, s; haghikia, a; gold, r; kleinewietfeld, m; muller, dn; linker, ra	impact of combined sodium chloride and saturated long-chain fatty acid challenge on the differentiation of t helper cells in neuroinflammation	journal of neuroinflammation	2017	10.1186/s12974-017-0954-y	9	1	NA	NA	NA	1_NA_NA_NA
andersen, cj	impact of dietary cholesterol on the pathophysiology of infectious and autoimmune disease	nutrients	2018	10.3390/nu10060764	0	2	NA	NA	NA	2_NA_NA_NA
johnson, bm; gaudreau, mc; al-gadban, mm; gudi, r; vasu, c	impact of dietary deviation on disease progression and gut microbiome composition in lupus-prone snf1 mice	clinical and experimental immunology	2015	10.1111/cei.12609	4	1	b	c	NA	1_b_c_NA
johnson, bm; gaudreau, mc; al-gadban, mm; gudi, r; vasu, c	impact of dietary deviation on disease progression and gut microbiome composition in lupus-prone snf1 mice	clinical and experimental immunology	2015	10.1111/cei.12609	4	1	b	NA	NA	1_b_NA_NA
johnson, bm; gaudreau, mc; al-gadban, mm; gudi, r; vasu, c	impact of dietary deviation on disease progression and gut microbiome composition in lupus-prone snf1 mice	clinical and experimental immunology	2015	10.1111/cei.12609	4	1	NA	NA	NA	1_NA_NA_NA
van dyken, p; lacoste, b	impact of metabolic syndrome on neuroinflammation and the blood-brain barrier	frontiers in neuroscience	2018	10.3389/fnins.2018.00930	1	NA	NA	NA	NA	NA_NA_NA_NA
rasmussen, nf; rubin, kh; stougaard, m; tjonneland, a; stenager, e; hetland, ml; glintborg, b; bygum, a; andersen, v	impact of red meat, processed meat and fibre intake on risk of late-onset chronic inflammatory diseases: prospective cohort study on lifestyle factors using the danish 'diet, cancer and health' cohort (procid-dch): protocol	bmj open	2019	10.1136/bmjopen-2018-024555	2	1	a	a	b	1_a_a_b
rasmussen, nf; rubin, kh; stougaard, m; tjonneland, a; stenager, e; hetland, ml; glintborg, b; bygum, a; andersen, v	impact of red meat, processed meat and fibre intake on risk of late-onset chronic inflammatory diseases: prospective cohort study on lifestyle factors using the danish 'diet, cancer and health' cohort (procid-dch): protocol	bmj open	2019	10.1136/bmjopen-2018-024555	2	1	a	a	NA	1_a_a_NA
rasmussen, nf; rubin, kh; stougaard, m; tjonneland, a; stenager, e; hetland, ml; glintborg, b; bygum, a; andersen, v	impact of red meat, processed meat and fibre intake on risk of late-onset chronic inflammatory diseases: prospective cohort study on lifestyle factors using the danish 'diet, cancer and health' cohort (procid-dch): protocol	bmj open	2019	10.1136/bmjopen-2018-024555	2	1	a	NA	NA	1_a_NA_NA
rasmussen, nf; rubin, kh; stougaard, m; tjonneland, a; stenager, e; hetland, ml; glintborg, b; bygum, a; andersen, v	impact of red meat, processed meat and fibre intake on risk of late-onset chronic inflammatory diseases: prospective cohort study on lifestyle factors using the danish 'diet, cancer and health' cohort (procid-dch): protocol	bmj open	2019	10.1136/bmjopen-2018-024555	2	1	NA	NA	NA	1_NA_NA_NA
wahls, tl; titcomb, tj; bisht, b; ten eyck, p; rubenstein, lm; carr, lj; darling, wg; hoth, kf; kamholz, j; snetselaar, lg	impact of the swank and wahls elimination dietary interventions on fatigue and quality of life in relapsing-remitting multiple sclerosis: the waves randomized parallel-arm clinical trial	multiple sclerosis journal-experimental translational and clinical	2021	10.1177/20552173211035399	2	1	a	a	a	1_a_a_a
wahls, tl; titcomb, tj; bisht, b; ten eyck, p; rubenstein, lm; carr, lj; darling, wg; hoth, kf; kamholz, j; snetselaar, lg	impact of the swank and wahls elimination dietary interventions on fatigue and quality of life in relapsing-remitting multiple sclerosis: the waves randomized parallel-arm clinical trial	multiple sclerosis journal-experimental translational and clinical	2021	10.1177/20552173211035399	2	1	a	a	NA	1_a_a_NA
wahls, tl; titcomb, tj; bisht, b; ten eyck, p; rubenstein, lm; carr, lj; darling, wg; hoth, kf; kamholz, j; snetselaar, lg	impact of the swank and wahls elimination dietary interventions on fatigue and quality of life in relapsing-remitting multiple sclerosis: the waves randomized parallel-arm clinical trial	multiple sclerosis journal-experimental translational and clinical	2021	10.1177/20552173211035399	2	1	a	NA	NA	1_a_NA_NA
wahls, tl; titcomb, tj; bisht, b; ten eyck, p; rubenstein, lm; carr, lj; darling, wg; hoth, kf; kamholz, j; snetselaar, lg	impact of the swank and wahls elimination dietary interventions on fatigue and quality of life in relapsing-remitting multiple sclerosis: the waves randomized parallel-arm clinical trial	multiple sclerosis journal-experimental translational and clinical	2021	10.1177/20552173211035399	2	1	NA	NA	NA	1_NA_NA_NA
gandhi, f; jhaveri, s; avanthika, c; singh, a; jain, n; gulraiz, a; shah, p; nasir, f	impact of vitamin d supplementation on multiple sclerosis	cureus	2021	10.7759/cureus.18487	0	1	c	b	NA	1_c_b_NA
gandhi, f; jhaveri, s; avanthika, c; singh, a; jain, n; gulraiz, a; shah, p; nasir, f	impact of vitamin d supplementation on multiple sclerosis	cureus	2021	10.7759/cureus.18487	0	1	c	NA	NA	1_c_NA_NA
gandhi, f; jhaveri, s; avanthika, c; singh, a; jain, n; gulraiz, a; shah, p; nasir, f	impact of vitamin d supplementation on multiple sclerosis	cureus	2021	10.7759/cureus.18487	0	1	NA	NA	NA	1_NA_NA_NA
haase, s; haghikia, a; wilck, n; muller, dn; linker, ra	impacts of microbiome metabolites on immune regulation and autoimmunity	immunology	2018	10.1111/imm.12933	0	1	b	a	NA	1_b_a_NA
haase, s; haghikia, a; wilck, n; muller, dn; linker, ra	impacts of microbiome metabolites on immune regulation and autoimmunity	immunology	2018	10.1111/imm.12933	0	1	b	NA	NA	1_b_NA_NA
haase, s; haghikia, a; wilck, n; muller, dn; linker, ra	impacts of microbiome metabolites on immune regulation and autoimmunity	immunology	2018	10.1111/imm.12933	0	1	NA	NA	NA	1_NA_NA_NA
gluck, me; ziker, c; schwegler, m; thearle, m; votruba, sb; krakoff, j	impaired glucose regulation is associated with poorer performance on the stroop task	physiology & behavior	2013	10.1016/j.physbeh.2013.09.001	0	NA	NA	NA	NA	NA_NA_NA_NA
hirschberg, s; gisevius, b; duscha, a; haghikia, a	implications of diet and the gut microbiome in neuroinflammatory and neurodegenerative diseases	international journal of molecular sciences	2019	10.3390/ijms20123109	2	1	b	c	NA	1_b_c_NA
hirschberg, s; gisevius, b; duscha, a; haghikia, a	implications of diet and the gut microbiome in neuroinflammatory and neurodegenerative diseases	international journal of molecular sciences	2019	10.3390/ijms20123109	2	1	b	NA	NA	1_b_NA_NA
hirschberg, s; gisevius, b; duscha, a; haghikia, a	implications of diet and the gut microbiome in neuroinflammatory and neurodegenerative diseases	international journal of molecular sciences	2019	10.3390/ijms20123109	2	1	NA	NA	NA	1_NA_NA_NA
hucke, s; wiendl, h; klotz, l	implications of dietary salt intake for multiple sclerosis pathogenesis	multiple sclerosis journal	2016	10.1177/1352458515609431	7	1	b	a	NA	1_b_a_NA
hucke, s; wiendl, h; klotz, l	implications of dietary salt intake for multiple sclerosis pathogenesis	multiple sclerosis journal	2016	10.1177/1352458515609431	7	1	b	NA	NA	1_b_NA_NA
hucke, s; wiendl, h; klotz, l	implications of dietary salt intake for multiple sclerosis pathogenesis	multiple sclerosis journal	2016	10.1177/1352458515609431	7	1	NA	NA	NA	1_NA_NA_NA
durlach, j; pages, n; bac, p; bara, m; guiet-bara, a	importance of magnesium depletion with hypofunction of the biological clock in the pathophysiology of headhaches with photophobia, sudden infant death and some clinical forms of multiple sclerosis	magnesium research	2004	NA	1	1	a	b	NA	1_a_b_NA
durlach, j; pages, n; bac, p; bara, m; guiet-bara, a	importance of magnesium depletion with hypofunction of the biological clock in the pathophysiology of headhaches with photophobia, sudden infant death and some clinical forms of multiple sclerosis	magnesium research	2004	NA	1	1	a	NA	NA	1_a_NA_NA
durlach, j; pages, n; bac, p; bara, m; guiet-bara, a	importance of magnesium depletion with hypofunction of the biological clock in the pathophysiology of headhaches with photophobia, sudden infant death and some clinical forms of multiple sclerosis	magnesium research	2004	NA	1	1	NA	NA	NA	1_NA_NA_NA
rashvand, f; abtahi, m; eshgh, zm; farvid, m; pouraram, h	improvement in activity of daily living and fatigue in multiple sclerosis patients: the impact of nutrition education	nursing and midwifery studies	2016	10.17795/nmsjournal32862	0	1	a	b	NA	1_a_b_NA
rashvand, f; abtahi, m; eshgh, zm; farvid, m; pouraram, h	improvement in activity of daily living and fatigue in multiple sclerosis patients: the impact of nutrition education	nursing and midwifery studies	2016	10.17795/nmsjournal32862	0	1	a	NA	NA	1_a_NA_NA
rashvand, f; abtahi, m; eshgh, zm; farvid, m; pouraram, h	improvement in activity of daily living and fatigue in multiple sclerosis patients: the impact of nutrition education	nursing and midwifery studies	2016	10.17795/nmsjournal32862	0	1	NA	NA	NA	1_NA_NA_NA
ganji, r; razavi, s; ghasemi, n; mardani, m	improvement of remyelination in demyelinated corpus callosum using human adipose-derived stem cells (hadscs) and pregnenolone in the cuprizone rat model of multiple sclerosis	journal of molecular neuroscience	2020	10.1007/s12031-020-01515-w	0	2	NA	NA	NA	2_NA_NA_NA
hesse, a; wagner, m; held, j; brikk, w; salinas-riester, g; hao, zy; waisman, a; kuhlmann, t	in toxic demyelination oligodendroglial cell death occurs early and is fas independent	neurobiology of disease	2010	10.1016/j.nbd.2009.10.016	10	2	a	NA	NA	2_a_NA_NA
hesse, a; wagner, m; held, j; brikk, w; salinas-riester, g; hao, zy; waisman, a; kuhlmann, t	in toxic demyelination oligodendroglial cell death occurs early and is fas independent	neurobiology of disease	2010	10.1016/j.nbd.2009.10.016	10	2	NA	NA	NA	2_NA_NA_NA
kang, js; cheng, h; ji, jz; incardona, j; rampe, d	in vitro electrocardiographic and cardiac ion channel effects of (-)-epigallocatechin-3-gallate, the main catechin of green tea	journal of pharmacology and experimental therapeutics	2010	10.1124/jpet.110.169391	0	NA	NA	NA	NA	NA_NA_NA_NA
farhangi, s; dehghan, s; totonchi, m; javan, m	in vivo conversion of astrocytes to oligodendrocyte lineage cells in adult mice demyelinated brains by sox2	multiple sclerosis and related disorders	2019	10.1016/j.msard.2018.12.041	0	NA	NA	NA	NA	NA_NA_NA_NA
lee, dw; kwon, ji; woo, cw; heo, h; kim, kw; woo, dc; kim, jk; lee, dh	in vivo measurement of neurochemical abnormalities in the hippocampus in a rat model of cuprizone-induced demyelination	diagnostics	2021	10.3390/diagnostics11010045	0	2	a	NA	NA	2_a_NA_NA
lee, dw; kwon, ji; woo, cw; heo, h; kim, kw; woo, dc; kim, jk; lee, dh	in vivo measurement of neurochemical abnormalities in the hippocampus in a rat model of cuprizone-induced demyelination	diagnostics	2021	10.3390/diagnostics11010045	0	2	NA	NA	NA	2_NA_NA_NA
midgard, r	incidence and prevalence of multiple sclerosis in norway	acta neurologica scandinavica	2012	10.1111/ane.12025	0	NA	NA	NA	NA	NA_NA_NA_NA
narisetty, v; pokalkar, d	incidence of subclinical neuropathy in newly diagnosed hiv positive patients	journal of evolution of medical and dental sciences-jemds	2016	10.14260/jemds/2016/991	0	NA	NA	NA	NA	NA_NA_NA_NA
jimenez, jv; richards, tl; heide, ac; grierson, jr; shankland, eg	incorporation of a phosphonium analog of choline into the rat-brain as measured by magnetic-resonance spectroscopy	magnetic resonance in medicine	1995	10.1002/mrm.1910330302	0	NA	NA	NA	NA	NA_NA_NA_NA
[truncated: 1,757 more rows]
